# Supplementary material for: Kokumi taste perception is functional in a model carnivore, the domestic cat (Felis catus)
Source: PubMed Central journal article supplement (PMC8131363; doi:10.1038/s41598-021-89558-w), 2021-05-18
Supplement: 41598_2021_89558_MOESM1_ESM.pdf [file 41598_2021_89558_MOESM1_ESM.pdf]

**Kokumi taste perception is functional in a model carnivore, the domestic cat (*Felis catus*) – Supplementary Data**

Laffitte A.<sup>1†</sup>, Gibbs M.<sup>1†</sup>, Hernangomez de Alvaro C.<sup>1</sup>, Addison J.<sup>1</sup>, Lonsdale ZN<sup>1</sup>., Giribaldi MG.<sup>2,3</sup>, Rossignoli A.<sup>2,3</sup>, Vennegeerts T.<sup>2,3</sup>, Winnig M.<sup>2,3</sup>, Klebansky B.<sup>4</sup>, Skiles J.<sup>4,5</sup>, Logan DW.<sup>1</sup>, McGrane SJ.<sup>1</sup>

<sup>1</sup>WALTHAM Petcare Science Institute, Freeby Lane, Waltham on the Wolds, Melton Mowbray, Leicestershire, LE14 4RT, United Kingdom.

<sup>2</sup>IMAX Discovery GmbH, Otto-Hahn-Straße 15, 44227 Dortmund, Germany.

<sup>3</sup>AXXAM S.p.A., OpenZone, Via Meucci 3, Bresso, MI 20091, Italy.

<sup>4</sup>BioPredict, Inc., 4 Adele Avenue, Demarest, NJ 07627, USA.

<sup>5</sup>Current Address: Valis Pharma, Ins., 545 Bonair Way, La Jolla, CA 92037, USA

<sup>†</sup>These authors contributed equally to this work.

Corresponding author: [scott.mcgrane@effem.com](mailto:scott.mcgrane@effem.com)

*CaSR expression in cat circumvallate papillae RT-PCR gels*

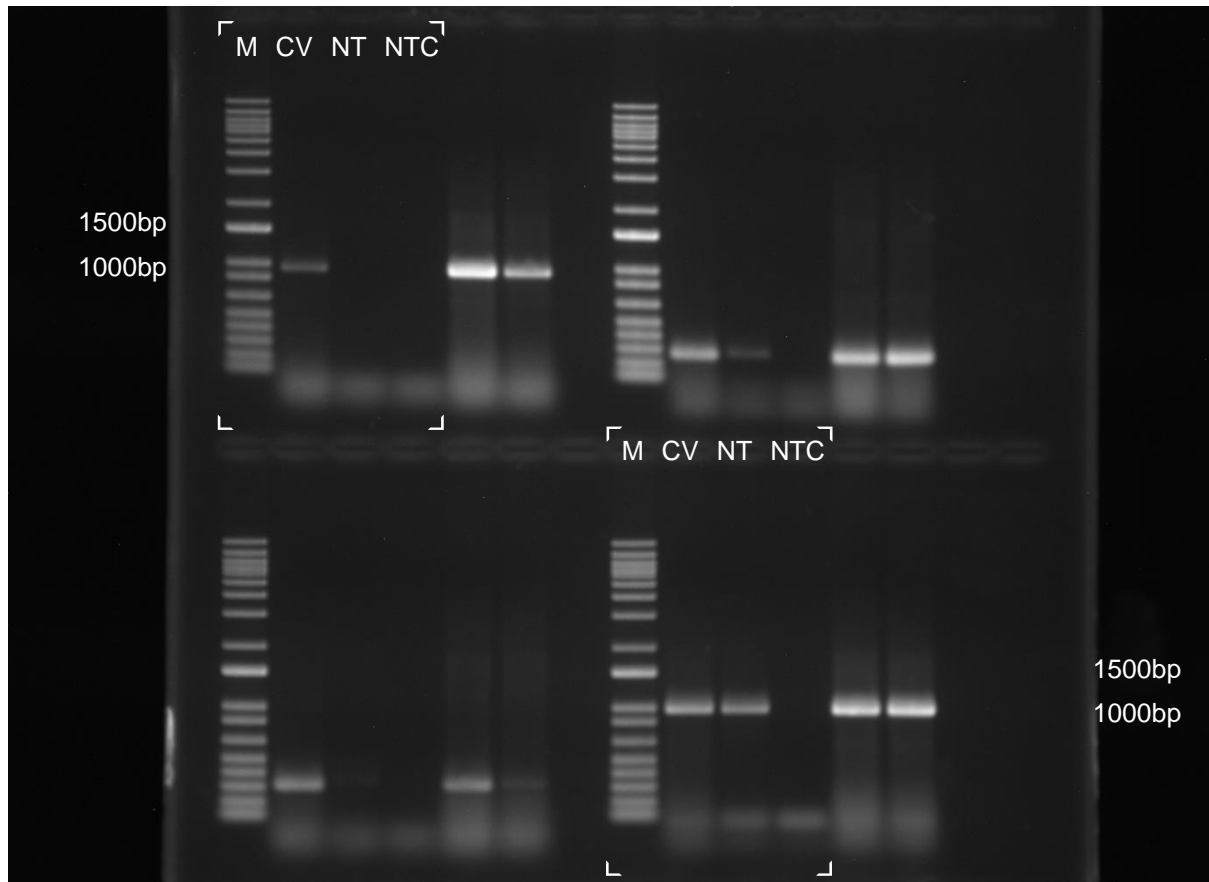

**Supplementary Figure 1:** Full gel corresponding to Figure 1 in the manuscript, with *CaSR* expression (white brackets upper left-hand corner) and *GAPDH* expression (white brackets lower right-hand corner). Other samples shown are not relevant to the work presented in the paper. CV- circumvallate papilla, NT-non-taste epithelial tissue, NTC- no-template controls, M - molecular size marker.



# Mammalian CaSR Sequence alignment

CLUSTAL O (1.2.4) multiple sequence alignment

```
ENSMEUP00000013310_Neug/1-956 ----- 0
ENSTBEP00000002487_Tbel/1-914 ----- 0
ENSPCAP00000000755_Pcap/1-1085 -----MAFYSCCLMLLAF-AWRTSAYGPDQRAQKKGD 31
ENSCHOP000000011907_Chof/1-954 -----MAFYSCCVILLAS-VWCTSAYGPDQRAQKKGD 31
ENSVFAP000000001982_Vpac/1-1087 -----MASYSCCVILLAF-AWCASAYGPDQRAQKKGD 31
ENSEEUP000000009670_Eeur/1-946 -----MAFYCYCLILLAF-TWDISAYGPDQRAQKKGD 31
ENSOANP000000015961_Oana/1-1083 -----MTRFGCWLVLAAF-PWALSAYGPDQRAQKKGD 31
ENSOPRP00000000261_Opri/1-1082 -----MALHSHCLILLAL-AWHSSAYGPDQRAQKKGD 31
ENSJJAP000000004721_Jjac/1-1084 -----MVGYSCLVLLALACLSHASAYGPDQRAQKKGD 32
ENSPCIP000000034747_Pcin/1-1018 -----MTYYRCLILLAF-TWNASAYGPDQRAQKKGD 31
ENSMODP000000022810_Mdom/1-1069 -----MTYYRCLILLAL-TWNTSAYGPDQRAQKKGD 31
ENSVURP00010007344_Vurs/1-1070 -----MTYYRCLILLAF-TWNISAYGPDQRAQKKGD 31
ENSSHAP000000014890_Shar/1-1072 -----MTFYRCLVLLAF-TWNTSAYGPDQRAQKKGD 31
ENSMaup000000005394_Maur/1-954 -----MASYSCCLALLAL-AWHSSAYGPDQRAQKKGD 31
ENSOCUP000000025672_Ocun/1-1063 -----MAFPSSHCLIFLAL-AWYSSAYGPDQRAQKKGD 31
ENSPVAP000000011981_Pvam/1-1085 -----MALHSCCLILLAF-TWLTSAAYGPDQRAQKKGD 31
ENSETEP000000011160_Etel/1-1024 ----- 0
ENSFDAp000000010532_Fdam/1-1108 MSGSKGESFRGSQTPLTTVSLPWREGRIMASYSCLVLLAL-AWHASAYGPDQRAQKKGD 59
ENSODEP000000013257_Odeg/1-1070 -----MVSYGCLVLLAL-AWYSSAYGPDQRAQKKGD 31
ENSHGLP000000002019_Hgfe/1-1108 MSCSKRESSGQPQITTTIESLSWREGRIMASYSCLVLLAL-AWHSSAYGPDQRAQKKGD 59
ENSCLAP000000021334_Clan/1-1114 MSCSTGESSRGPQTTTIIIMSLAWREGRIMASCGCLVLLAL-TWQVSAYGPDQRAQKKGD 59
ENSCAPP000000014352_Cape/1-1068 -----MAFYSCCLVLLVL-AWHSSAYGPDQRAQKKGD 31
ENSCPOP000000011705_Cpor/1-1071 -----MAFYSCCLVLLVL-AWHSSAYGPDQRAQKKGD 31
ENSSARP000000006151_Sara/1-1085 -----MAFYSCCLLLAF-TWNTSAYGPDQRAQKKGD 31
ENSLAFP000000018459_Lafr/1-1090 -----MAFYSRCLILLAF-AWRPAAAYGPDQRAQKKGD 31
ENSDNOP000000011819_Dnov/1-1075 -----MAFYSCSLILLAF-AWCTSAYGPDQRAQKKGD 31
ENSSSCP000000041077_Sscr/1-1089 -----MAFYSCCVILLAL-TWCTSAYGPDQRAQKKGD 31
ENSTTRP00000001326_Ttru/1-1091 -----MAFYSCCVIFLAF-TWCTSAYGPDQRAQKKGD 31
ENSBBP000000002858_Bbbi/1-1068 -----MALYSCCVILLAFSTWCTSAYGPDQRAQKKGD 32
ENSOARP000000021602_Oari/1-1032 -----MALYSCCVILLAFSTWCTSAYGPDQRAQKKGD 32
ENSCHIP000000033385_Chir/1-1085 -----MALNSCCVILLAFSTWCTSAYGPDQRAQKKGD 32
ENSBTAP0000000059078_Btau/1-1085 -----MALYSCCVILLAFSTWCTSAYGPDQRAQKKGD 32
ENSBIXP000000038534_Bthy/1-1085 -----MALYSCCVILLAFSTWCTSAYGPDQRAQKKGD 32
ENSBMUP000000019115_Bmut/1-1081 -----MALYSCCVILLAFSTWCTSAYGPDQRAQKKGD 32
ENSBIXP00000005030570_Bihy/1-1085 -----MALYSCCVILLAFSTWCTSAYGPDQRAQKKGD 32
ENSMUGP000000006365_Mung/1-1080 -----MASYSCFLALLAL-AWHSSAYGPDQRAQKKGD 31
ENSRNOP0000000069629_Rnor/1-1079 -----MASYSCCLALLAL-AWHSSAYGPDQRAQKKGD 31
MGP_PahariEiJ_P0028852_Mpah/1-1003 -----MAWYGCLALLAL-AWHSSAYGPDQRAQKKGD 31
MGP_SPRETEiJ_P0043347_Mspr/1-1079 -----MAWFGYCLALLAL-TWHSAYGPDQRAQKKGD 31
ENSMUSP0000000069080_Mmus/1-1079 -----MAWFGYCLALLAL-TWHSAYGPDQRAQKKGD 31
ENSMOCP000000010340_Moch/1-1076 -----MASYSCCLALLAL-ACHSSAYGPDQRAQKKGD 31
ENSPEMP000000029995_Pmba/1-1076 -----MAFYSCCLALLAL-AWHSSAYGPDQRAQKKGD 31
ENSCGRP00015024036_Cgpi/1-1081 -----MASYSCCLALLAL-AWHSSAYGPDQRAQKKGD 31
ENSCGRP000001016053_Cgch/1-1081 -----MASYSCCLALLAL-AWHSSAYGPDQRAQKKGD 31
ENSCGRP000000017369_Cgcr/1-1081 -----MASYSCCLALLAL-AWHSSAYGPDQRAQKKGD 31
ENSDORP000000002959_Dord/1-1078 -----MVLYSNCLILWAL-AWLSSAYGPDQRAQKKGD 31
ENSTSYp000000002643_Csyr/1-1015 -----MAFYSCCVMLVAL-AWHTSAYGPDQRAQKKGD 31
ENSMMLP000000008249_Mluc/1-1075 -----MALYSCCLILLAF-TWHTSAYGPDQRAQKKGD 31
ENSECAP000000022285_Ecab/1-1084 -----MAFYSCCLILVAF-TWCTSAYGPDQRAQKKGD 31
ENSEASP00000005022676_Eaas/1-1094 -----MAFYSCCLILVAF-TWCTSAYGPDQRAQKKGD 31
ENSCAFP000000017381_Cfam/1-1075 -----MAFHSCSLILLAI-TWCTSAYGPDQRAQKKGD 31
ENSCAFP000200007154_Cldi/1-1075 -----MAFHSCSLILLAI-TWCTSAYGPDQRAQKKGD 31
ENSVVUP000000030826_Vvul/1-1075 -----MAFHSCSLILLAI-TWCTSAYGPDQRAQKKGD 31
ENSFCAp000000008080_Fcat/1-1081 -----MAFYSCCLILLAI-TWCTSAYGPDQRAQKKGD 31
ENSPPRP0000000023800_Ppar/1-1081 -----MAFYSCCLILLAI-TWCTSAYGPDQRAQKKGD 31
ENSPTIP000000015042_Ptal/1-1081 -----MAFYSCCLILLAI-TWCISAYGPDQRAQKKGD 31
ENSMUPP000000004759_Mpfu/1-1082 -----MAFYSCCFILLAS-TWCTSAYGPDQRAQKKGD 31
ENSNVIP000000018564_Nvis/1-1092 -----MAFYSCCFILLAS-TWCTSAYGPDQRAQKKGD 31
ENSUMAP000000035085_Umar/1-1071 -----MAFYSCCLTLLAI-TWCTSAYGPDQRAQKKGD 31
ENSUAMP000000035930_Uame/1-1079 -----MAFYSCCLTLLAI-TWCTSAYGPDQRAQKKGD 31
ENSAMEP000000015060_Amel/1-1089 -----MAFYSCCLTLLAI-TWCTSAYGPDQRAQKKGD 31
ENSSDAP000000007437_Sdau/1-1079 -----MVPHSCCLVLLAF-AWYSSAYGPDQRAQKKGD 31
ENSSTOP000000003945_Itri/1-1070 -----MVPHSCCLVLLAL-AWYSSAYGPDQRAQKKGD 31
ENSMMP000000015298_Mmma/1-1083 -----MVPHSCCLVLLAF-AWYSSAYGPDQRAQKKGD 31
ENSUPAP00010025947_Upar/1-1086 -----MVPHSCCLVLLAF-AWYSSAYGPDQRAQKKGD 31
ENSSBOP000000036416_Sbbo/1-1078 -----MAFYSCCVLLAL-TWHSAYGPDQRAQKKGD 31
ENSANAP0000000028404_Anan/1-1078 -----MAFYSCCVLLAL-AWHTSAYGPDQRAQKKGD 31
ENSCCAP000000024327_Ccap/1-1077 -----MAFYSCCVLLAL-TWHTSAYGPDQRAQKKGD 31
ENSCJAP000000062854_Cjac/1-1089 -----MAFYSCCVLLAL-TWHTSAYGPDQRAQKKGD 31
ENSNLEP000000000336_Nleu/1-1088 -----MAFYSCCVLLAL-TWHTSAYGPDQRAQKKGD 31
ENSPYP000000015087_Pabe/1-1078 -----MAFYSCCVLLAL-TWHTSAYGPDQRAQKKGD 31
ENSP000000420194_Hsap/1-1088 -----MAFYSCCVLLAL-TWHTSAYGPDQRAQKKGD 31
ENSGGOP0000000020287_Ggor/1-1078 -----MAFYSCCVLLAL-TWHTSAYGPDQRAQKKGD 31
ENSPFAP000000026371_Ppan/1-1078 -----MAFYSCCVLLAL-TWHTSAYGPDQRAQKKGD 31
ENSPTRP000000043342_Ptro/1-1078 -----MAFYSCCVLLAL-TWHTSAYGPDQRAQKKGD 31
ENSCSAP000000003635_Csab/1-882 ----- 0
ENSMMUP000000061002_Mmul/1-1078 -----MAFYCCFWLLAL-TWHTSAYGPNQRAQKKGD 31
ENSPANP000000004316_Panu/1-1081 ----------WVLLAL-TWHTSAYGPDQRAQKKGD 24
ENSCATP0000000028615_Caty/1-1078 -----MAFYCCFWLLAL-TWHTSAYGPDQRAQKKGD 31
ENSMFAP000000042132_Mfas/1-1078 -----MAFYCCFWLLAL-TWHTSAYGPDQRAQKKGD 31
```

ENSMNEP00000024602\_Mnem/1-1078 -----MAFYCCFWVLLAL-TWHTSAYGPDQRAQKKGD 31  
ENSMLEP00000008744\_Mleu/1-1088 -----MAFYCCFWVLLAL-TWHTSAYGPDQRAQKKGD 31  
ENSTGEP00000008766\_Tgel/1-1088 -----MAFYCCFWVLLAL-TWHTSAYGPDQRAQKKGD 31  
ENSCANP000000040262\_Capa/1-1088 -----MAFYCCFWVLLAL-TWHTSAYGPDQRAQKKGD 31  
ENSPTEP00000016080\_Ptep/1-1088 -----MAFYCCFWVLLAL-TWHTSAYGPDQRAQKKGD 31  
ENSRBIP00000006831\_Rbie/1-1078 -----MAFYCCFWVLLAL-TWHTSAYGPDQRAQKKGD 31  
ENSRROP00000007818\_Rrox/1-1088 -----MAFYCCFWVLLAL-TWHTSAYGPDQRAQKKGD 31  
ENSOGAP00000002850\_Ogar/1-1077 -----MAFYSCGILLAL-AWHTSAYGPDQRAQKKGD 31  
ENSMICP000000050654\_Mmur/1-1075 -----MAFYSCGILLAL-AWHTSAYGPDQRAQKKGD 31  
ENSPCOP00000009624\_Pcoq/1-1076 -----MAFYSCGILLAL-AWHTSAYGPDQRAQKKGD 31  
ENSPSPM00000007909\_Psim/1-1084 -----MAFYSCGILLAL-AWHTSAYGPDQRAQKKGD 31

ENSMPEP00000013310\_Neug/1-956 -----YNFRGFRWLQAMIFAIEEINSSPALLPNN 29  
ENSTBEP00000002487\_Tbel/1-914 ----- 0  
ENSPCAP00000000755\_Pcap/1-1085 IILGGLFPIHFGVAAKDQDLKSRPESVECI RYNFRGFRWLQAMIFAIEEINSSPVLLPNN 91  
ENSHOCP00000001907\_Chof/1-954 IILGGLFPIHFGVAAKDQDLKSRPESVECI RYNFRGFRWLQAMIFAIEEINSSPALLPNN 91  
ENSVPA00000001982\_Vpac/1-1087 IILGGLFPIHFGVAAKDQDLKSRPESVECI RYNFRGFRWLQAMIFAIEEINSSPALLPNN 91  
ENSEEUP000000009670\_Eeur/1-946 IILGGLFPIHFGVAAKDQDLKSRPESVECI RYNFRGFRWLQAMIFAIEEINSSPALLPNN 91  
ENSOANP000000015961\_Oana/1-1083 IILGGLFPIHFGVAAKDQDLKSRPESVECI RYNFRGFRWLQAMIFAIEEINSSPALLPNN 91  
ENSOPRP00000000261\_Opri/1-1082 IILGGLFPIHFGVAAKDQDLKSRPESVECI RYNFRGFRWLQAMIFAIEEINSSPALLPNN 91  
ENSJAP000000004721\_Jjac/1-1084 IILGGLFPIHFGVAAKDQDLKSRPESVECI RYNFRGFRWLQAMIFAIEEINSSPALLPNN 92  
ENSPCIP000000034747\_Pcin/1-1018 IILGGLFPIHFGVAAKDQDLKSRPESVECI RYNFRGFRWLQAMIFAIEEINSSPALLPNN 91  
ENSMODP000000022810\_Mdom/1-1069 IILGGLFPIHFGVAAKDQDLKSRPESVECI RYNFRGFRWLQAMIFAIEEINSSPALLPNN 91  
ENSVURP000010007344\_Vurs/1-1070 IILGGLFPIHFGVAAKDQDLKSRPESVECI RYNFRGFRWLQAMIFAIEEINSSPALLPNN 91  
ENSSHAP000000014990\_Shar/1-1072 IILGGLFPIHFGVAAKDQDLKSRPESVECI RYNFRGFRWLQAMIFAIEEINSSPALLPNN 91  
ENSMaup00000005394\_Maur/1-954 IILGGLFPIHFGVAAKDQDLKSRPESVECI RYNFRGFRWLQAMIFAIEEINSSPALLPNN 91  
ENSOCUP000000025672\_Ocur/1-1063 IILGGLFPIHFGVAAKDQDLKSRPESVECI RYNFRGFRWLQAMIFAIEEINSSPALLPNN 91  
ENSPVAP000000011981\_Pvam/1-1085 IILGGLFPIHFGVAAKDQDLKSRPESVECI RYNFRGFRWLQAMIFAIEEINSSPALLPNN 91  
ENSETEP00000001160\_Etel/1-1024 -----YNFRGFRWLQAMIFAIEEINSSPALLPNN 29  
ENSFADP000000010532\_Fdam/1-1108 IILGGLFPIHFGVAAKDQDLKSRPESVECI RYNFRGFRWLQAMIFAIEEINSSPALLPNN 119  
ENSODEP000000013257\_Odeg/1-1070 IILGGLFPIHFGVAAKDQDLKSRPESVECI RYNFRGFRWLQAMIFAIEEINSSPALLPNN 91  
ENSHGLP00000002019\_Hgfe/1-1108 IILGGLFPIHFGVAAKDQDLKSRPESVECI RYNFRGFRWLQAMIFAIEEINSSPALLPNN 119  
ENSLAP000000021334\_Clan/1-1114 IILGGLFPIHFGVAAKDQDLKSRPESVECI RYNFRGFRWLQAMIFAIEEINSSPALLPNN 119  
ENSCAPP000000014352\_Shar/1-1068 IILGGLFPIHFGVAAKDQDLKSRPESVECI RYNFRGFRWLQAMIFAIEEINSSPALLPNN 91  
ENSCPOP000000011705\_Cpor/1-1071 IILGGLFPIHFGVAAKDQDLKSRPESVECI RYNFRGFRWLQAMIFAIEEINSSPALLPNN 91  
ENSSARP000000006151\_Sara/1-1085 IILGGLFPIHFGVAAKDQDLKSRPESVECI RYNFRGFRWLQAMIFAIEEINSSPALLPNN 91  
ENSLAFP000000018459\_Larf/1-1090 IILGGLFPIHFGVAAKDQDLKSRPESVECI RYNFRGFRWLQAMIFAIEEINSSPALLPNN 91  
ENSDNOP000000011819\_Dnov/1-1075 IILGGLFPIHFGVAAKDQDLKSRPESVECI RYNFRGFRWLQAMIFAIEEINSSPALLPNN 91  
ENSSSCP000000041077\_Sscr/1-1089 IILGGLFPIHFGVAAKDQDLKSRPESVECI RYNFRGFRWLQAMIFAIEEINSSPALLPNN 91  
ENSTTRP000000001266\_Ttrr/1-1091 IILGGLFPIHFGVAAKDQDLKSRPESVECI RYNFRGFRWLQAMIFAIEEINSSPALLPNN 91  
ENSBEBP000000002858\_Bbbi/1-1068 IILGGLFPIHFGVAAKDQDLKSRPESVECI RYNFRGFRWLQAMIFAIEEINSSPALLPNN 92  
ENSOARP000000021602\_Oari/1-1032 IILGGLFPIHFGVAAKDQDLKSRPESVECI RYNFRGFRWLQAMIFAIEEINSSPALLPNN 92  
ENSCHIP000000033385\_Chir/1-1085 IILGGLFPIHFGVAAKDQDLKSRPESVECI RYNFRGFRWLQAMIFAIEEINSSPALLPNN 92  
ENSBTAP000000059078\_Btau/1-1085 IILGGLFPIHFGVAAKDQDLKSRPESVECI RYNFRGFRWLQAMIFAIEEINSSPALLPNN 92  
ENSBIXP000000038534\_Bthy/1-1085 IILGGLFPIHFGVAAKDQDLKSRPESVECI RYNFRGFRWLQAMIFAIEEINSSPALLPNN 92  
ENSBMUP000000019115\_Bmut/1-1081 IILGGLFPIHFGVAAKDQDLKSRPESVECI RYNFRGFRWLQAMIFAIEEINSSPALLPNN 92  
ENSBIXP00000005030570\_Bihy/1-1085 IILGGLFPIHFGVAAKDQDLKSRPESVECI RYNFRGFRWLQAMIFAIEEINSSPALLPNN 92  
ENSMUGP000000006365\_Mung/1-1080 IILGGLFPIHFGVAAKDQDLKSRPESVECI RYNFRGFRWLQAMIFAIEEINSSPALLPNN 91  
ENSRNOP000000069629\_Rnor/1-1079 IILGGLFPIHFGVAAKDQDLKSRPESVECI RYNFRGFRWLQAMIFAIEEINSSPALLPNN 91  
MGP\_PahariEij\_P0028852\_Mpah/1-1003 IILGGLFPIHFGVAAKDQDLKSRPESVECI RYNFRGFRWLQAMIFAIEEINSSPALLPNN 91  
MGP\_SPRETEij\_P0043347\_Mspr/1-1079 IILGGLFPIHFGVAAKDQDLKSRPESVECI RYNFRGFRWLQAMIFAIEEINSSPALLPNN 91  
ENSMUSP000000069080\_Mmus/1-1079 IILGGLFPIHFGVAAKDQDLKSRPESVECI RYNFRGFRWLQAMIFAIEEINSSPALLPNN 91  
ENSMOCP000000010340\_Moch/1-1076 IILGGLFPIHFGVAAKDQDLKSRPESVECI RYNFRGFRWLQAMIFAIEEINSSPALLPNN 91  
ENSPMP000000029995\_Pmba/1-1076 IILGGLFPIHFGVAAKDQDLKSRPESVECI RYNFRGFRWLQAMIFAIEEINSSPALLPNN 91  
ENSCGRP000015024036\_Cgpi/1-1081 IILGGLFPIHFGVAAKDQDLKSRPESVECI RYNFRGFRWLQAMIFAIEEINSSPALLPNN 91  
ENSCGRP000001016053\_Cgch/1-1081 IILGGLFPIHFGVAAKDQDLKSRPESVECI RYNFRGFRWLQAMIFAIEEINSSPALLPNN 91  
ENSCGRP000000017369\_Cgcr/1-1081 IILGGLFPIHFGVAAKDQDLKSRPESVECI RYNFRGFRWLQAMIFAIEEINSSPALLPNN 91  
ENSDORP000000002959\_Dord/1-1078 IILGGLFPIHFGVAAKDQDLKSRPESVECI RYNFRGFRWLQAMIFAIEEINSSPALLPNN 91  
ENSTSP000000002643\_Csyr/1-1015 IILGGLFPIHFGVAAKDQDLKSRPESVECI RYNFRGFRWLQAMIFAIEEINSSPALLPNN 91  
ENSMMLP000000008249\_Mluc/1-1075 IILGGLFPIHFGVAAKDQDLKSRPESVECI RYNFRGFRWLQAMIFAIEEINSSPALLPNN 91  
ENSECAP00000002285\_Ecab/1-1084 IILGGLFPIHFGVAAKDQDLKSRPESVECI RYNFRGFRWLQAMIFAIEEINSSPALLPNN 91  
ENSEASP000000022676\_Eaas/1-1094 IILGGLFPIHFGVAAKDQDLKSRPESVECI RYNFRGFRWLQAMIFAIEEINSSPALLPNN 91  
ENSCAFP000000017381\_Cfam/1-1075 IILGGLFPIHFGVAAKDQDLKSRPESVECI RYNFRGFRWLQAMIFAIEEINSSPALLPNN 91  
ENSCAFP00000001754\_Cldi/1-1075 IILGGLFPIHFGVAAKDQDLKSRPESVECI RYNFRGFRWLQAMIFAIEEINSSPALLPNN 91  
ENSVVUP000000030826\_Vvul/1-1075 IILGGLFPIHFGVAAKDQDLKSRPESVECI RYNFRGFRWLQAMIFAIEEINSSPALLPNN 91  
ENSCAP0000000008080\_Fcat/1-1081 IILGGLFPIHFGVAAKDQDLKSRPESVECI RYNFRGFRWLQAMIFAIEEINSSPALLPNN 91  
ENSPRP000000023800\_Ppar/1-1081 IILGGLFPIHFGVAAKDQDLKSRPESVECI RYNFRGFRWLQAMIFAIEEINSSPALLPNN 91  
ENSPPTP000000015042\_Ptal/1-1081 IILGGLFPIHFGVAAKDQDLKSRPESVECI RYNFRGFRWLQAMIFAIEEINSSPALLPNN 91  
ENSMUPP000000004759\_Mpfu/1-1082 IILGGLFPIHFGVAAKDQDLKSRPESVECI RYNFRGFRWLQAMIFAIEEINSSPALLPNN 91  
ENSNVIP000000018564\_Nvis/1-1092 IILGGLFPIHFGVAAKDQDLKSRPESVECI RYNFRGFRWLQAMIFAIEEINSSPALLPNN 91  
ENSUMAP000000035085\_Umar/1-1071 IILGGLFPIHFGVAAKDQDLKSRPESVECI RYNFRGFRWLQAMIFAIEEINSSPALLPNN 91  
ENSUAMP000000035930\_Uame/1-1079 IILGGLFPIHFGVAAKDQDLKSRPESVECI RYNFRGFRWLQAMIFAIEEINSSPALLPNN 91  
ENSAMEP000000015060\_Amel/1-1089 IILGGLFPIHFGVAAKDQDLKSRPESVECI RYNFRGFRWLQAMIFAIEEINSSPALLPNN 91  
ENSSDAP000000007437\_Sdau/1-1079 IILGGLFPIHFGVAAKDQDLKSRPESVECI RYNFRGFRWLQAMIFAIEEINSSPALLPNN 91  
ENSSTOP000000003945\_Itri/1-1070 IILGGLFPIHFGVAAKDQDLKSRPESVECI RYNFRGFRWLQAMIFAIEEINSSPALLPNN 91  
ENSMMP000000015298\_Mmma/1-1083 IILGGLFPIHFGVAAKDQDLKSRPESVECI RYNFRGFRWLQAMIFAIEEINSSPALLPNN 91  
ENSUPAP000010025947\_Upar/1-1086 IILGGLFPIHFGVAAKDQDLKSRPESVECI RYNFRGFRWLQAMIFAIEEINSSPALLPNN 91  
ENSSBOP000000036416\_Sbbo/1-1078 IILGGLFPIHFGVAAKDQDLKSRPESVECI RYNFRGFRWLQAMIFAIEEINSSPALLPNN 91  
ENSANAP000000028404\_Anan/1-1078 IILGGLFPIHFGVAAKDQDLKSRPESVECI RYNFRGFRWLQAMIFAIEEINSSPALLPNN 91  
ENSCCAP000000024327\_Ccap/1-1077 IILGGLFPIHFGVAAKDQDLKSRPESVECI RYNFRGFRWLQAMIFAIEEINSSPALLPNN 91  
ENSCJAP000000062854\_Cjac/1-1089 IILGGLFPIHFGVAAKDQDLKSRPESVECI RYNFRGFRWLQAMIFAIEEINSSPALLPNN 91  
ENSNLEP000000000336\_Nleu/1-1088 IILGGLFPIHFGVAAKDQDLKSRPESVECI RYNFRGFRWLQAMIFAIEEINSSPALLPNN 91  
ENSPYP000000015087\_Pabe/1-1078 IILGGLFPIHFGVAAKDQDLKSRPESVECI RYNFRGFRWLQAMIFAIEEINSSPALLPNN 91  
ENSPHOP000000420194\_Hsap/1-1088 IILGGLFPIHFGVAAKDQDLKSRPESVECI RYNFRGFRWLQAMIFAIEEINSSPALLPNN 91  
ENSGGOP000000020287\_Ggor/1-1078 IILGGLFPIHFGVAAKDQDLKSRPESVECI RYNFRGFRWLQAMIFAIEEINSSPALLPNN 91  
ENSPAP000000026371\_Ppan/1-1078 IILGGLFPIHFGVAAKDQDLKSRPESVECI RYNFRGFRWLQAMIFAIEEINSSPALLPNN 91  
ENSPTRP000000043342\_Ptrr/1-1078 IILGGLFPIHFGVAAKDQDLKSRPESVECI RYNFRGFRWLQAMIFAIEEINSSPALLPNN 91



|                                    |                                                                   |     |
|------------------------------------|-------------------------------------------------------------------|-----|
| ENSPPYP00000015087_Pabe/1-1078     | TLGYRIFDTCNTVSKALEATLSFVAQNKIDSLNLDEFNCNCSEHIPSTIAVVGATGSGVST     | 151 |
| ENSP00000420194_Hsap/1-1088        | TLGYRIFDTCNTVSKALEATLSFVAQNKIDSLNLDEFNCNCSEHIPSTIAVVGATGSGVST     | 151 |
| ENSGG0P00000020287_Ggor/1-1078     | TLGYRIFDTCNTVSKALEATLSFVAQNKIDSLNLDEFNCNCSEHIPSTIAVVGATGSGVST     | 151 |
| ENSPAP00000026371_Ppan/1-1078      | TLGYRIFDTCNTVSKALEATLSFVAQNKIDSLNLDEFNCNCSEHIPSTIAVVGATGSGVST     | 151 |
| ENSPTRP00000043342_Ptro/1-1078     | TLGYRIFDTCNTVSKALEATLSFVAQNKIDSLNLDEFNCNCSEHIPSTIAVVGATGSGVST     | 151 |
| ENSCSAP00000003635_Csab/1-882      | -----                                                             | 0   |
| ENSMMP000000061002_Mmul/1-1078     | TLGYRIFDTCNTVSKALEATLSFVAQNKIDSLNLDEFNCNCSEHIPSTIAVVGATGSGVST     | 151 |
| ENSPANP00000004316_Panu/1-1081     | TLGYRIFDTCNTVSKALEATLSFVAQNKIDSLNLDEFNCNCSEHIPSTIAVVGATGSGVST     | 144 |
| ENSCATP000000028615_Caty/1-1078    | TLGYRIFDTCNTVSKALEATLSFVAQNKIDSLNLDEFNCNCSEHIPSTIAVVGATGSGVST     | 151 |
| ENSMFAP000000042132_Mfas/1-1078    | TLGYRIFDTCNTVSKALEATLSFVAQNKIDSLNLDEFNCNCSEHIPSTIAVVGATGSGVST     | 151 |
| ENSMNEP000000024602_Capa/1-1078    | TLGYRIFDTCNTVSKALEATLSFVAQNKIDSLNLDEFNCNCSEHIPSTIAVVGATGSGVST     | 151 |
| ENSMLEP000000008744_Mleu/1-1088    | TLGYRIFDTCNTVSKALEATLSFVAQNKIDSLNLDEFNCNCSEHIPSTIAVVGATGSGVST     | 151 |
| ENSTGEP000000008766_Tgel/1-1088    | TLGYRIFDTCNTVSKALEATLSFVAQNKIDSLNLDEFNCNCSEHIPSTIAVVGATGSGVST     | 151 |
| ENSCANP000000040262_Capa/1-1088    | TLGYRIFDTCNTVSKALEATLSFVAQNKIDSLNLDEFNCNCSEHIPSTIAVVGATGSGVST     | 151 |
| ENSPTPE00000016080_Ptep/1-1088     | TLGYRIFDTCNTVSKALEATLSFVAQNKIDSLNLDEFNCNCSEHIPSTIAVVGATGSGVST     | 151 |
| ENSRBIP00000006831_Rbie/1-1078     | TLGYRIFDTCNTVSKALEATLSFVAQNKIDSLNLDEFNCNCSEHIPSTIAVVGATGSGVST     | 151 |
| ENSRROP000000007818_Rrox/1-1088    | TLGYRIFDTCNTVSKALEATLSFVAQNKIDSLNLDEFNCNCSEHIPSTIAVVGATGSGVST     | 151 |
| ENSOGAP000000002850_Ogar/1-1077    | TLGYRIFDTCNTVSKALEATLSFVAQNKIDSLNLDEFNCNCSEHIPSTIAVVGATGSGVST     | 151 |
| ENSMICP000000050654_Mmur/1-1075    | TLGYRIFDTCNTVSKALEATLSFVAQNKIDSLNLDEFNCNCSEHIPSTIAVVGATGSGVST     | 151 |
| ENSPCOP000000009624_Pcoq/1-1076    | TLGYRIFDTCNTVSKALEATLSFVAQNKIDSLNLDEFNCNCSEHIPSTIAVVGATGSGVST     | 151 |
| ENSPSPM00000007909_Psim/1-1084     | TLGYRIFDTCNTVSKALEATLSFVAQNKIDSLNLDEFNCNCSEHIPSTIAVVGATGSGVST     | 151 |
|                                    |                                                                   |     |
| ENSMUEP00000013310_Neug/1-956      | AVANLLGLFYIPXXXXXXXXXXXXXXXXXXXXXXXXXXXXXXXXXXXXXXXXXXXXXXXXX--X  | 147 |
| ENSTBEP000000002487_Tbel/1-914     | -----VSAYSSRLLSNKNQFKSFLRTIPNDEHQATAMADIEYFRWNWVG                 | 46  |
| ENSPCAP000000000755_Pcap/1-1085    | AVANLLGLFYIPQ-VSAYSSRLLSNKNQFKSFLRTIPNDEHQATAMADIEYFRWNWVG        | 210 |
| ENSCHOP00000011907_Chof/1-954      | AVANLLGLFYIPQXXXXXXXXXXXXXXXXXXXXXXXXXXXXXXXXXXXXXXXXXXXXXXXXX-XX | 210 |
| ENSVPAP000000001982_Vpac/1-1087    | AVANLLGLFYIPQ-VSAYSSRLLSNKNQFKSFLRTIPNDEHQATAMADIEYFRWNWVG        | 210 |
| ENSEEUP000000009670_Eeur/1-946     | AVANLLGLFYIPQ-V-----NLLFHFPGWPWIG                                 | 177 |
| ENSOANP00000015961_Oana/1-1083     | AVANLLGLFYIPQ-VSAYSSRLLSNKNQFKSFLRTIPNDEHQATAMADIEHFRWNWVG        | 210 |
| ENSOPRP000000000261_Opri/1-1082    | AVANLLGLFYIPQ-VSAYSSRLLSNKNQFKSFLRTIPNDEHQATAMADIEYFRWNWVG        | 210 |
| ENSJJAP000000004721_Jjac/1-1084    | AVANLLGLFYIPQ-VSAYSSRLLSNKNQFKSFLRTIPNDEHQATAMADIEYFRWNWVG        | 211 |
| ENSPCIP00000034747_Pcin/1-1018     | -----L-LGYASSRLLSNKNQYKSFRLTIPNDEHQATAMADIEYFRWNWVG               | 165 |
| ENSMODP000000022810_Mdom/1-1069    | AVANLLGLFYIPQ-VSAYSSRLLSNKNQYKSFRLTIPNDEHQATAMADIEYFRWNWVG        | 210 |
| ENSVURP00010007324_Pcur/1-1070     | AVANLLGLFYIPQ-VSAYSSRLLSNKNQYKSFRLTIPNDEHQATAMADIEYFRWNWVG        | 210 |
| ENSSHAP00000014890_Shar/1-1072     | AVANLLGLFYIPQ-VSAYSSRLLSNKNQYKSFRLTIPNDEHQATAMADIEYFRWNWVG        | 210 |
| ENSMAPU00000005394_Maur/1-954      | AVANLLGLFYIPQ-VSAYSSRLLSNKNQYKSFRLTIPNDEHQATAMADIEYFRWNWVG        | 210 |
| ENSCUP000000025672_Ocun/1-1063     | AVANLLGLFYIPQ-VSAYSSRLLSNKNQYKSFRLTIPNDEHQATAMADIEYFRWNWVG        | 210 |
| ENSPVAP00000011981_Pvam/1-1085     | AVANLLGLFYIPQ-VSAYSSRLLSNKNQYKSFRLTIPNDEHQATAMADIEYFRWNWVG        | 210 |
| ENSETEP00000011160_Etel/1-1024     | AVANLLGLFYIPQ-VSALPSRLLSNKNQYKSFRLTIPNDEHQATAMADIEYFRWNWVG        | 148 |
| ENSFDA00000010532_Fdam/1-1108      | AVANLLGLFYIPQ-VSAYSSRLLSNKNQYKSFRLTIPNDEHQATAMADIEYFRWNWVG        | 238 |
| ENSODEP00000013257_Odeg/1-1070     | AVANLLGLFYIPQ-VSAYSSRLLSNKNQYKSFRLTIPNDEHQATAMADIEYFRWNWVG        | 210 |
| ENSHGLP00000002019_Hgfe/1-1108     | AVANLLGLFYIPQ-VSAYSSRLLSNKNQYKSFRLTIPNDEHQATAMADIEYFRWNWVG        | 238 |
| ENSC LAP000000021334_Clan/1-1114   | AVANLLGLFYIPQ-VSAYSSRLLSNKNQYKSFRLTIPNDEHQATAMADIEYFRWNWVG        | 238 |
| ENSCAPP00000014352_Cape/1-1068     | AVANLLGLFYIPQ-VSAYSSRLLSNKNQYKSFRLTIPNDEHQATAMADIEYFRWNWVG        | 210 |
| ENSCPOP00000011705_Cpor/1-1071     | AVANLLGLFYIPQ-VSAYSSRLLSNKNQYKSFRLTIPNDEHQATAMADIEYFRWNWVG        | 210 |
| ENSSARP000000006151_Sara/1-1085    | AVANLLGLFYIPQ-VSAYSSRLLSNKNQYKSFRLTIPNDEHQATAMADIEYFRWNWVG        | 210 |
| ENSLAFP00000018459_Lafr/1-1090     | AVANLLGLFYIPQ-VSAYSSRLLSNKNQYKSFRLTIPNDEHQATAMADIEYFRWNWVG        | 210 |
| ENSDNOP00000011819_Dnov/1-1075     | AVANLLGLFYIPQ-VSAYSSRLLSNKNQYKSFRLTIPNDEHQATAMADIEYFRWNWVG        | 210 |
| ENSSSCP000000041077_Sscr/1-1089    | AVANLLGLFYIPQ-VSAYSSRLLSNKNQYKSFRLTIPNDEHQATAMADIEYFRWNWVG        | 210 |
| ENSTTRP000000001326_Ttru/1-1091    | AVANLLGLFYIPQ-VSAYSSRLLSNKNQYKSFRLTIPNDEHQATAMADIEYFRWNWVG        | 210 |
| ENSBEBP000000002858_Bbbi/1-1068    | AVANLLGLFYIPQ-VSAYSSRLLSNKNQYKSFRLTIPNDEHQATAMADIEYFRWNWVG        | 211 |
| ENSOARP00000021602_Oari/1-1032     | AVANLLGLFYIPQ-VSAYSSRLLSNKNQYKSFRLTIPNDEHQATAMADIEYFRWNWVG        | 211 |
| ENSCHIP00000033385_Chir/1-1085     | AVANLLGLFYIPQ-VSAYSSRLLSNKNQYKSFRLTIPNDEHQATAMADIEYFRWNWVG        | 211 |
| ENSBTAP000000059078_Btau/1-1085    | AVANLLGLFYIPQ-VSAYSSRLLSNKNQYKSFRLTIPNDEHQATAMADIEYFRWNWVG        | 211 |
| ENSBIXP00000038534_Bthy/1-1085     | AVANLLGLFYIPQ-VSAYSSRLLSNKNQYKSFRLTIPNDEHQATAMADIEYFRWNWVG        | 211 |
| ENSBMUP00000019115_Bmut/1-1081     | AVANLLGLFYIPQ-VSAYSSRLLSNKNQYKSFRLTIPNDEHQATAMADIEYFRWNWVG        | 211 |
| ENSBIXP000000503570_Bihy/1-1085    | AVANLLGLFYIPQ-VSAYSSRLLSNKNQYKSFRLTIPNDEHQATAMADIEYFRWNWVG        | 211 |
| ENSMUGP00000006365_Mung/1-1080     | AVANLLGLFYIPQ-VSAYSSRLLSNKNQYKSFRLTIPNDEHQATAMADIEYFRWNWVG        | 210 |
| ENSRNOP00000006929_Rnor/1-1079     | AVANLLGLFYIPQ-VSAYSSRLLSNKNQYKSFRLTIPNDEHQATAMADIEYFRWNWVG        | 210 |
| MGP_PahariEiJ_P0028852_Mpah/1-1003 | AVANLLGLFYIPQ-VSAYSSRLLSNKNQYKSFRLTIPNDEHQATAMADIEYFRWNWVG        | 210 |
| MGP_SPRETEiJ_P0043347_Mspr/1-1079  | AVANLLGLFYIPQ-VSAYSSRLLSNKNQYKSFRLTIPNDEHQATAMADIEYFRWNWVG        | 210 |
| ENSMSP000000069080_Mmus/1-1079     | AVANLLGLFYIPQ-VSAYSSRLLSNKNQYKSFRLTIPNDEHQATAMADIEYFRWNWVG        | 210 |
| ENSMOCP00000010340_Moch/1-1076     | AVANLLGLFYIPQ-VSAYSSRLLSNKNQYKSFRLTIPNDEHQATAMADIEYFRWNWVG        | 210 |
| ENSPEMP00000029995_Pmba/1-1076     | AVANLLGLFYIPQ-VSAYSSRLLSNKNQYKSFRLTIPNDEHQATAMADIEYFRWNWVG        | 210 |
| ENSCGRP00015024036_Cgpi/1-1081     | AVANLLGLFYIPQ-VSAYSSRLLSNKNQYKSFRLTIPNDELQATAMADIEYFRWNWVG        | 210 |
| ENSCGRP00001016053_Cgch/1-1081     | AVANLLGLFYIPQ-VSAYSSRLLSNKNQYKSFRLTIPNDELQATAMADIEYFRWNWVG        | 210 |
| ENSCGRP00000017369_Cgcr/1-1081     | AVANLLGLFYIPQ-VSAYSSRLLSNKNQYKSFRLTIPNDELQATAMADIEYFRWNWVG        | 210 |
| ENSDORP00000002959_Dord/1-1078     | AVANLLGLFYIPQ-VSAYSSRLLSNKNQYKSFRLTIPNDEHQATAMADIEYFRWNWVG        | 210 |
| ENSTSY000000002643_Csyr/1-1015     | AVANLLGLFYIPQ-VSAYSSRLLSNKNQYKSFRLTIPNDEHQATAMADIEYFRWNWVG        | 210 |
| ENSM LUP00000008249_Mluc/1-1075    | AVANLLGLFYIPQ-VSAYSSRLLSNKNQYKSFRLTIPNDEHQATAMADIEYFRWNWVG        | 210 |
| ENSECAP000000022285_Ecab/1-1084    | AVANLLGLFYIPQ-VSAYSSRLLSNKNQYKSFRLTIPNDEHQATAMADIEYFRWNWVG        | 210 |
| ENSEASP0000005022676_Eaas/1-1094   | AVANLLGLFYIPQ-VSAYSSRLLSNKNQYKSFRLTIPNDEHQATAMADIEYFRWNWVG        | 210 |
| ENSCAFP00000017381_Cfam/1-1075     | AVANLLGLFYIPQ-VSAYSSRLLSNKNQYKSFRLTIPNDEHQATAMADIEYFRWNWVG        | 210 |
| ENSCAFP000020007154_Cldi/1-1075    | AVANLLGLFYIPQ-VSAYSSRLLSNKNQYKSFRLTIPNDEHQATAMADIEYFRWNWVG        | 210 |
| ENSVVUP000000030826_Vvul/1-1075    | AVANLLGLFYIPQ-VSAYSSRLLSNKNQYKSFRLTIPNDEHQATAMADIEYFRWNWVG        | 210 |
| ENSFCA000000008080_Fcat/1-1081     | AVANLLGLFYIPQ-VSAYSSRLLSNKNQYKSFRLTIPNDEHQATAMADIEYFRWNWVG        | 210 |
| ENSPRRP000000023800_Ppar/1-1081    | AVANLLGLFYIPQ-VSAYSSRLLSNKNQYKSFRLTIPNDEHQATAMADIEYFRWNWVG        | 210 |
| ENSPPTIP00000015042_Ptal/1-1081    | AVANLLGLFYIPQ-VSAYSSRLLSNKNQYKSFRLTIPNDEHQATAMADIEYFRWNWVG        | 210 |
| ENSM PUP00000004759_Mpfi/1-1082    | AVANLLGLFYIPQ-VSAYSSRLLSNKNQYKSFRLTIPNDEHQATAMADIEYFRWNWVG        | 210 |
| ENSNVIP00000018564_Nvis/1-1092     | AVANLLGLFYIPQ-VSAYSSRLLSNKNQYKSFRLTIPNDEHQATAMADIEYFRWNWVG        | 210 |
| ENSUMAP000000035085_Umar/1-1071    | AVANLLGLFYIPQ-VSAYSSRLLSNKNQYKSFRLTIPNDEHQATAMADIEYFRWNWVG        | 210 |
| ENSUAMP00000035930_Uame/1-1079     | AVANLLGLFYIPQ-VSAYSSRLLSNKNQYKSFRLTIPNDEHQATAMADIEYFRWNWVG        | 210 |
| ENSAMEP00000015060_Amel/1-1089     | AVANLLGLFYIPQ-VSAYSSRLLSNKNQYKSFRLTIPNDEHQATAMADIEYFRWNWVG        | 210 |
| ENSDAP000000007437_Sdau/1-1079     | AVANLLGLFYIPQ-VSAYSSRLLSNKNQYKSFRLTIPNDEHQATAMADIEYFRWNWVG        | 210 |
| ENSSTOP00000003945_Itri/1-1070     | AVANLLGLFYIPQ-VSAYSSRLLSNKNQYKSFRLTIPNDEHQATAMADIEYFRWNWVG        | 210 |
| ENSMMP00000015298_Mmma/1-1083      | AVANLLGLFYIPQ-VSAYSSRLLSNKNQYKSFRLTIPNDEHQATAMADIEYFRWNWVG        | 210 |
| ENSUPAP00010025947_Upar/1-1086     | AVANLLGLFYIPQ-VSAYSSRLLSNKNQYKSFRLTIPNDEHQATAMADIEYFRWNWVG        | 210 |





ENSAMEP00000015060\_Amel/1-1089 TIAADDDYGRPGIEKFFREEAEERDIDFSELISQYSDEEEIQVQVVEIQNSTAKVIVVF 270  
ENSSDAP00000007437\_Sdau/1-1079 TIAADDDYGRPGIEKFFREEAEERDIDFSELISQYSDEEEIQVQVVEIQNSTAKVIVVF 270  
ENSSSTOP00000003945\_Itri/1-1070 TIAADDDYGRPGIEKFFREEAEERDIDFSELISQYSDEEEIQVQVVEIQNSTAKVIVVF 270  
ENSMMP000000015298\_Mmma/1-1083 TIAADDDYGRPGIEKFFREEAEERDIDFSELISQYSDEEEIQVQVVEIQNSTAKVIVVF 270  
ENSUPAP00010025947\_Upar/1-1086 TIAADDDYGRPGIEKFFREEAEERDIDFSELISQYSDEEEIQVQVVEIQNSTAKVIVVF 270  
ENSSBOP00000036416\_Sbbo/1-1078 TIAADDDYGRPGIEKFFREEAEERDIDFSELISQYSDEEEIQVQVVEIQNSTAKVIVVF 270  
ENSANAP00000028404\_Anan/1-1078 TIAADDDYGRPGIEKFFREEAEERDIDFSELISQYSDEEEIQVQVVEIQNSTAKVIVVF 270  
ENSCCAP00000024327\_Ccap/1-1077 TIAADDDYGRPGIEKFFREEAEERDIDFSELISQYSDEEEIQVQVVEIQNSTAKVIVVF 270  
ENSCJAP00000062854\_Cjac/1-1089 TIAADDDYGRPGIEKFFREEAEERDIDFSELISQYSDEEEIQVQVVEIQNSTAKVIVVF 270  
ENSNLEP00000000336\_Nleu/1-1088 TIAADDDYGRPGIEKFFREEAEERDIDFSELISQYSDEEEIQVQVVEIQNSTAKVIVVF 270  
ENSPYP000000015087\_Pabe/1-1078 TIAADDDYGRPGIEKFFREEAEERDIDFSELISQYSDEEEIQVQVVEIQNSTAKVIVVF 270  
ENSP00000420194\_Hsap/1-1088 TIAADDDYGRPGIEKFFREEAEERDIDFSELISQYSDEEEIQVQVVEIQNSTAKVIVVF 270  
ENSGGOP00000020287\_Ggor/1-1078 TIAADDDYGRPGIEKFFREEAEERDIDFSELISQYSDEEEIQVQVVEIQNSTAKVIVVF 270  
ENSPAP00000026371\_Ppan/1-1078 TIAADDDYGRPGIEKFFREEAEERDIDFSELISQYSDEEEIQVQVVEIQNSTAKVIVVF 270  
ENSPTRP00000043342\_Ptro/1-1078 TIAADDDYGRPGIEKFFREEAEERDIDFSELISQYSDEEEIQVQVVEIQNSTAKVIVVF 270  
ENSCSAP00000003635\_Csab/1-882 TIAADDDYGRPGIEKFFREEAEERDIDFSELISQYSDEEEIQVQVVEIQNSTAKVIVVF 74  
ENSMMP000000061002\_Mmul/1-1078 TIAADDDYGRPGIEKFFREEAEERDIDFSELISQYSDEEEIQVQVVEIQNSTAKVIVVF 270  
ENSPANP00000004316\_Panu/1-1081 TIAADDDYGRPGIEKFFREEAEERDIDFSELISQYSDEEEIQVQVVEIQNSTAKVIVVF 263  
ENSCATP00000028615\_Caty/1-1078 TIAADDDYGRPGIEKFFREEAEERDIDFSELISQYSDEEEIQVQVVEIQNSTAKVIVVF 270  
ENSMFAP000000042132\_Mfas/1-1078 TIAADDDYGRPGIEKFFREEAEERDIDFSELISQYSDEEEIQVQVVEIQNSTAKVIVVF 270  
ENSMNEP00000024602\_Mnem/1-1078 TIAADDDYGRPGIEKFFREEAEERDIDFSELISQYSDEEEIQVQVVEIQNSTAKVIVVF 270  
ENSMLEP00000008744\_Mleu/1-1088 TIAADDDYGRPGIEKFFREEAEERDIDFSELISQYSDEEEIQVQVVEIQNSTAKVIVVF 270  
ENSTGEP000000008766\_Tgel/1-1088 TIAADDDYGRPGIEKFFREEAEERDIDFSELISQYSDEEEIQVQVVEIQNSTAKVIVVF 270  
ENSCANP00000040262\_Capa/1-1088 TIAADDDYGRPGIEKFFREEAEERDIDFSELISQYSDEEEIQVQVVEIQNSTAKVIVVF 270  
ENSPTEP00000016080\_Ptep/1-1088 TIAADDDYGRPGIEKFFREEAEERDIDFSELISQYSDEEEIQVQVVEIQNSTAKVIVVF 270  
ENSRBP00000006831\_Rbie/1-1078 TIAADDDYGRPGIEKFFREEAEERDIDFSELISQYSDEEEIQVQVVEIQNSTAKVIVVF 270  
ENSRROP00000007818\_Rrox/1-1088 TIAADDDYGRPGIEKFFREEAEERDIDFSELISQYSDEEEIQVQVVEIQNSTAKVIVVF 270  
ENSOGAP00000002850\_Ogar/1-1077 TIAADDDYGRPGIEKFFREEAEERDIDFSELISQYSDEEEIQVQVVEIQNSTAKVIVVF 270  
ENSMICP00000005654\_Mmur/1-1075 TIAADDDYGRPGIEKFFREEAEERDIDFSELISQYSDEEEIQVQVVEIQNSTAKVIVVF 270  
ENSPCOP00000009624\_Pcoq/1-1076 TIAADDDYGRPGIEKFFREEAEERDIDFSELISQYSDEEEIQVQVVEIQNSTAKVIVVF 270  
ENSPSPM00000007909\_Psim/1-1084 TIAADDDYGRPGIEKFFREEAEERDIDFSELISQYSDEEEIQVQVVEIQNSTAKVIVVF 270

ENSMEUP00000013310\_Neug/1-956 XXXXXXXXXXXXXXXXXXXXXXXXXXXXSEAWASSSLIAM-EFFHVIGGTTGFALKGGQIPGF 266  
ENSTBEP00000002487\_Tbel/1-914 SSGPDLEPLIKEIVRRNITGRIWLASEAWASSSLIAMPEYFHVVGTTGFALKAGQIPGF 166  
ENSPCAP00000000755\_Pcap/1-1085 SSGPDLEPLIKEIVRRNITGRIWLASEAWASSSLIAMPEYFHVVGTTGFALKAGQIPGF 330  
ENSCPOP00000011907\_Chof/1-954 XXXXXXXXXXXXXXXXXXXXXXXXXXXXSSSLIAMREYFHVVGTTGFALKAGQIPGF 329  
ENSVAP000000001982\_Vpar/1-1087 SSGPDLEPLIKEIVRRNITGRIWLASEAWASSSLIAMPEYFHVVGTTGFAL-AGQIPGF 329  
ENSEEUP000000009670\_Eeur/1-946 ASDLDLGLVMAIVHNNITGRTWLASEAWASSSLIAMPEYFHVVGTTGFALVPRADIPGL 295  
ENSOANP00000015961\_Oana/1-1083 SSGPDLEPLIKEIVRRNITGRIWLASEAWASSSLIAMPEYFHVVGTTGFALKAGQIPGF 330  
ENSOPRP00000000261\_Opri/1-1082 SSGPDLEPLIKEIVRRNITGRIWLASEAWASSSLIAMPEYFHVVGTTGFALKAGQIPGF 330  
ENSJAP000000004721\_Jjac/1-1084 SSGPDLEPLIKEIVRRNITGRIWLASEAWASSSLIAMPEYFHVVGTTGFALKAGQIPGF 331  
ENSPCIP000000034747\_Pcin/1-1018 SSGPDLEPLIKEIVRRNITGRIWLASEAWASSSLIAMPEYFHVVGTTGFALKAGQIPGF 270  
ENSMODP000000022810\_Mdom/1-1069 SSGPDLEPLIKEIVRRNITGRIWLASEAWASSSLIAMPEYFHVVGTTGFALKAGQIPGF 330  
ENSVURP00010007344\_Vurs/1-1070 SSGPDLEPLIKEIVRRNITGRIWLASEAWASSSLIAMPEYFHVVGTTGFALKAGQIPGF 330  
ENSSHAP00000014890\_Shar/1-1072 SSGPDLEPLIKEIVRRNITGRIWLASEAWASSSLIAMPEYFHVVGTTGFALKAGQIPGF 330  
ENSMAP000000005394\_Maur/1-954 SSGPDLEPLIKEIVRRNITGRIWLASEAWASSSLIAMPEYFHVVGTTGFALKAGQIPGF 330  
ENSOVAP000000025672\_Ocun/1-1063 SSGPDLEPLIKEIVRRNITGRIWLASEAWASSSLIAMPEYFHVVGTTGFALKAGQIPGF 330  
ENSPVAP00000011981\_Pvam/1-1085 SSGPDLEPLIKEIVRRNITGRIWLASEAWASSSLIAMPEYFHVVGTTGFALKAGQIPGF 330  
ENSETEP00000011160\_Etel/1-1024 SSGPDLEPLIKEIVRRNITGRIWLASEAWASSSLIAMPEYFHVVGTTGFALKAGQIPGF 268  
ENSFADP00000010532\_Fdam/1-1108 SSGPDLEPLIKEIVRRNITGRIWLASEAWASSSLIAMPEYFHVVGTTGFALKAGQIPGF 358  
ENSODEP00000013257\_Odeg/1-1070 SSGPDLEPLIKEIVRRNITGRIWLASEAWASSSLIAMPEYFHVVGTTGFALKAGQIPGF 330  
ENSHGLP00000002019\_Hgfe/1-1108 SSGPDLEPLIKEIVRRNITGRIWLASEAWASSSLIAMPEYFHVVGTTGFALKAGQIPGF 358  
ENSLCLAP00000021334\_Clan/1-1114 SSGPDLEPLIKEIVRRNITGRIWLASEAWASSSLIAMPEYFHVVGTTGFALKAGQIPGF 358  
ENSCAPP00000014352\_Cape/1-1068 SSGPDLEPLIKEIVRRNITGRIWLASEAWASSSLIAMPEYFHVVGTTGFALRAGQIPGF 330  
ENSCPOP00000011705\_Cpor/1-1071 SSGPDLEPLIKEIVRRNITGRIWLASEAWASSSLIAMPEYFHVVGTTGFALRAGQIPGF 330  
ENSSARP000000006151\_Sara/1-1085 SSGPDLEPLIKEIVRRNITGRIWLASEAWASSSLIAMPEYFHVVGTTGFALKAGQIPGF 330  
ENSLAFP00000018459\_Laftr/1-1090 SSGPDLEPLIKEIVRRNITGRIWLASEAWASSSLIAMPEYFHVVGTTGFALKAGQIPGF 330  
ENSDNOP00000011819\_Dnov/1-1075 SSGPDLEPLIKEIVRRNITGRIWLASEAWASSSLIAMPEYFHVVGTTGFALKAGQIPGF 330  
ENSSSCP000000041077\_Sscr/1-1089 SSGPDLEPLIKEIVRRNITGRIWLASEAWASSSLIAMPEYFHVVGTTGFALKAGQIPGF 330  
ENSTTRP00000001326\_Ttrr/1-1091 SSGPDLEPLIKEIVRRNITGRIWLASEAWASSSLIAMPEYFHVVGTTGFALKAGQIPGF 330  
ENSBBP000000002858\_Bbbi/1-1068 SSGPDLEPLIKEIVRRNITGRIWLASEAWASSSLIAMPEYFHVVGTTGFALKAGQIPGF 331  
ENSOARP00000021602\_Oari/1-1032 SSGPDLEPLIKEIVRRNITGRIWLASEAWASSSLIAMPEYFHVVGTTGFALKAGQIPGF 331  
ENSCHIP00000033385\_Chir/1-1085 SSGPDLEPLIKEIVRRNITGRIWLASEAWASSSLIAMPEYFHVVGTTGFALKAGQIPGF 331  
ENSBTAP00000059078\_Btau/1-1085 SSGPDLEPLIKEIVRRNITGRIWLASEAWASSSLIAMPEYFHVVGTTGFALKAGQIPGF 331  
ENSBIXP00000038534\_Bthy/1-1085 SSGPDLEPLIKEIVRRNITGRIWLASEAWASSSLIAMPEYFHVVGTTGFALKAGQIPGF 331  
ENSBMUP00000019115\_Bmut/1-1081 SSGPDLEPLIKEIVRRNITGRIWLASEAWASSSLIAMPEYFHVVGTTGFALKAGQIPGF 331  
ENSBIXP00005030570\_Bihy/1-1085 SSGPDLEPLIKEIVRRNITGRIWLASEAWASSSLIAMPEYFHVVGTTGFALKAGQIPGF 331  
ENSMUGP00000006365\_Mung/1-1080 SSGPDLEPLIKEIVRRNITGRIWLASEAWASSSLIAMPEYFHVVGTTGFALKAGQIPGF 330  
ENSRNOP00000006929\_Rnor/1-1079 SSGPDLEPLIKEIVRRNITGRIWLASEAWASSSLIAMPEYFHVVGTTGFALKAGQIPGF 330  
MGP\_PahariEiJ\_P0028852\_Mpah/1-1003 SSGPDLEPLIKEIVRRNITGRIWLASEAWASSSLIAMPEYFHVVGTTGFALKAGQIPGF 330  
MGP\_SPRETEiJ\_P0043347\_Mspr/1-1079 SSGPDLEPLIKEIVRRNITGRIWLASEAWASSSLIAMPEYFHVVGTTGFALKAGQIPGF 330  
ENSMUSP000000069080\_Mmus/1-1079 SSGPDLEPLIKEIVRRNITGRIWLASEAWASSSLIAMPEYFHVVGTTGFALKAGQIPGF 330  
ENSMOCP00000010340\_Moch/1-1076 SSGPDLEPLIKEIVRRNITGRIWLASEAWASSSLIAMPEYFHVVGTTGFALKAGQIPGF 330  
ENSPEMP00000029995\_Pmba/1-1076 SSGPDLEPLIKEIVRRNITGRIWLASEAWASSSLIAMPEYFHVVGTTGFALKAGQIPGF 330  
ENSCGRP00015024036\_Cgpi/1-1081 SSGPDLEPLIKEIVRRNITGRIWLASEAWASSSLIAMPEYFHVVGTTGFALKAGQIPGF 330  
ENSCGRP00001016053\_Cgch/1-1081 SSGPDLEPLIKEIVRRNITGRIWLASEAWASSSLIAMPEYFHVVGTTGFALKAGQIPGF 330  
ENSCGRP00000017369\_Cgcr/1-1081 SSGPDLEPLIKEIVRRNITGRIWLASEAWASSSLIAMPEYFHVVGTTGFALKAGQIPGF 330  
ENSDORP00000002959\_Dord/1-1078 SSGPDLEPLIREIVRRNITGRIWLASEAWASSSLIAMPEYFHVVGTTGFALKAGQIPGF 330  
ENSTSY00000002643\_Csyr/1-1015 SSGPDLEPLIKEIVRRNITGRIWLASEAWASSSLIAMPEYFHVVGTTGFALKAGQIPGF 330  
ENSMLUP00000008249\_Mluc/1-1075 SSGPDLEPLIKEIVRRNITGRIWLASEAWASSSLIAMPEYFHVVGTTGFALKAGQIPGF 330  
ENSECAP00000022285\_Ecab/1-1084 SSGPDLEPLIKEIVRRNITGRIWLASEAWASSSLIAMPEYFHVVGTTGFALKAGQIPGF 330  
ENSEASP00005022676\_Eaas/1-1094 SSGPDLEPLIKEIVRRNITGRIWLASEAWASSSLIAMPEYFHVVGTTGFALRAGQIPGF 330  
ENSCAFP00000017381\_Cfam/1-1075 SSGPDLEPLIKEIVRRNITGRIWLASEAWASSSLIAMPEYFHVVGTTGFALKAGQIPGF 330  
ENSCAFP00020007154\_Cldi/1-1075 SSGPDLEPLIKEIVRRNITGRIWLASEAWASSSLIAMPEYFHVVGTTGFALKAGQIPGF 330  
ENSVVUP00000030826\_Vvul/1-1075 SSGPDLEPLIKEIVRRNITGRIWLASEAWASSSLIAMPEYFHVVGTTGFALKAGQIPGF 330  
ENSCFAP00000008080\_Fcat/1-1081 SSGPDLEPLIKEIVRRNITGRIWLASEAWASSSLIAMPEYFHVVGTTGFALKAGQIPGF 330  
ENSPRP000000023800\_Ppar/1-1081 SSGPDLEPLIKEIVRRNITGRIWLASEAWASSSLIAMPEYFHVVGTTGFALKAGQIPGF 330

ENSPTIP00000015042\_Ptal/1-1081 SSGPDLEPLIKEIVRRNITGRIWLASEAWASSSLIAMPEYFHVVGTTIGFALKAGQIPGF 330  
ENSMUPUP00000004759\_Mpfa/1-1082 SSGPDLEPLIKEIVRRNITGRIWLASEAWASSSLIAMPEYFHVVGTTIGFALKAGQIPGF 330  
ENSNVIP00000018564\_Nvis/1-1092 SSGPDLEPLIKEIVRRNITGRIWLASEAWASSSLIAMPEYFHVVGTTIGFALKAGQIPGF 330  
ENSUMAP000000035085\_Umar/1-1071 SSGPDLEPLIKEIVRRNITGRIWLASEAWASSSLIAMPEYFHVVGTTIGFALKAGQIPGF 330  
ENSUAMP000000035930\_Uame/1-1079 SSGPDLEPLIKEIVRRNITGRIWLASEAWASSSLIAMPEYFHVVGTTIGFALKAGQIPGF 330  
ENSAMEP00000015060\_Amel/1-1089 SSGPDLEPLIKEIVRRNITGRIWLASEAWASSSLIAMPEYFHVVGTTIGFALKAGQIPGF 330  
ENSSDAP00000007437\_Sdau/1-1079 SSGPDLEPLIKEIVRRNITGRIWLASEAWASSSLIAMPEYFHVVGTTIGFALKAGQIPGF 330  
ENSTTOP00000003945\_Itri/1-1070 SSGPDLEPLIKEIVRRNITGRIWLASEAWASSSLIAMPEYFHVVGTTIGFALKAGQIPGF 330  
ENSMMP00000015298\_Mmma/1-1083 SSGPDLEPLIKEIVRRNITGRIWLASEAWASSSLIAMPEYFHVVGTTIGFALKAGQIPGF 330  
ENSUPAP00010025947\_Upar/1-1086 SSGPDLEPLIKEIVRRNITGRIWLASEAWASSSLIAMPEYFHVVGTTIGFALKAGQIPGF 330  
ENSSBOP000000036416\_Sbbo/1-1078 SSGPDLEPLIKEIVRRNITGRIWLASEAWASSSLIAMPEYFHVVGTTIGFALKAGQIPGF 330  
ENSANAP000000028404\_Anan/1-1078 SSGPDLEPLIKEIVRRNITGRIWLASEAWASSSLIAMPEYFHVVGTTIGFALKAGQIPGF 330  
ENSCCAP000000024327\_Ccap/1-1077 SSGPDLEPLIKEIVRRNITGRIWLASEAWASSSLIAMPEYFHVVGTTIGFALKAGQIPGF 330  
ENSCJAP000000062854\_Cjac/1-1089 SSGPDLEPLIKEIVRRNITGRIWLASEAWASSSLIAMPEYFHVVGTTIGFALKAGQIPGF 330  
ENSNLEP00000000336\_Nleu/1-1088 SSGPDLEPLIKEIVRRNITGRIWLASEAWASSSLIAMPEYFHVVGTTIGFALKAGQIPGF 330  
ENSPYP000000015087\_Pabe/1-1078 SSGPDLEPLIKEIVRRNITGRIWLASEAWASSSLIAMPEYFHVVGTTIGFALKAGQIPGF 330  
ENSP00000420194\_Hsap/1-1088 SSGPDLEPLIKEIVRRNITGRIWLASEAWASSSLIAMPEYFHVVGTTIGFALKAGQIPGF 330  
ENSGGOP000000020287\_Ggor/1-1078 SSGPDLEPLIKEIVRRNITGRIWLASEAWASSSLIAMPEYFHVVGTTIGFALKAGQIPGF 330  
ENSPAP000000026371\_Ppan/1-1078 SSGPDLEPLIKEIVRRNITGRIWLASEAWASSSLIAMPEYFHVVGTTIGFALKAGQIPGF 330  
ENSPTRP000000043362\_Ptro/1-1078 SSGPDLEPLIKEIVRRNITGRIWLASEAWASSSLIAMPEYFHVVGTTIGFALKAGQIPGF 330  
ENSCSAP00000003635\_Csab/1-882 SSGPDLEPLIKEIVRRNITGRIWLASEAWASSSLIAMPEYFHVVGTTIGFALKAGQIPGF 134  
ENSMMP000000061002\_Mmul/1-1078 SSGPDLEPLIKEIVRRNITGRIWLASEAWASSSLIAMPEYFHVVGTTIGFALKAGQIPGF 330  
ENSPANP000000004316\_Ppac/1-1081 SSGPDLEPLIKEIVRRNITGRIWLASEAWASSSLIAMPEYFHVVGTTIGFALKAGQIPGF 323  
ENSCATP000000028615\_Caty/1-1078 SSGPDLEPLIKEIVRRNITGRIWLASEAWASSSLIAMPEYFHVVGTTIGFALKAGQIPGF 330  
ENSMFAP000000042132\_Mfas/1-1078 SSGPDLEPLIKEIVRRNITGRIWLASEAWASSSLIAMPEYFHVVGTTIGFALKAGQIPGF 330  
ENSMNEP0000000024602\_Mnem/1-1078 SSGPDLEPLIKEIVRRNITGRIWLASEAWASSSLIAMPEYFHVVGTTIGFALKAGQIPGF 330  
ENSMLEP000000008744\_Mleu/1-1088 SSGPDLEPLIKEIVRRNITGRIWLASEAWASSSLIAMPEYFHVVGTTIGFALKAGQIPGF 330  
ENSTGEP000000008766\_Tgel/1-1088 SSGPDLEPLIKEIVRRNITGRIWLASEAWASSSLIAMPEYFHVVGTTIGFALKAGQIPGF 330  
ENSCANP0000000040262\_Capa/1-1088 SSGPDLEPLIKEIVRRNITGRIWLASEAWASSSLIAMPEYFHVVGTTIGFALKAGQIPGF 330  
ENSPTEP00000016080\_Ptep/1-1088 SSGPDLEPLIKEIVRRNITGRIWLASEAWASSSLIAMPEYFHVVGTTIGFALKAGQIPGF 330  
ENSRBIP000000006831\_Rbie/1-1078 SSGPDLEPLIKEIVRRNITGRIWLASEAWASSSLIAMPEYFHVVGTTIGFALKAGQIPGF 330  
ENSRROP000000007818\_Rrox/1-1088 SSGPDLEPLIKEIVRRNITGRIWLASEAWASSSLIAMPEYFHVVGTTIGFALKAGQIPGF 330  
ENSOGAP00000002850\_Ogar/1-1077 SSGPDLEPLIKEIVRRNITGRIWLASEAWASSSLIAMPEYFHVVGTTIGFALKAGQIPGF 330  
ENSMICP000000005654\_Mmur/1-1075 SSGPDLEPLIKEIVRRNITGRIWLASEAWASSSLIAMPEYFHVVGTTIGFALKAGQIPGF 330  
ENSPCOP000000009624\_Pcoq/1-1076 SSGPDLEPLIKEIVRRNITGRIWLASEAWASSSLIAMPEYFHVVGTTIGFALKAGQIPGF 330  
ENSPSPM00000007909\_Psim/1-1084 SSGPDLEPLIKEIVRRNITGRIWLASEAWASSSLIAMPEYFHVVGTTIGFALKAGQIPGF 330

: \*\*\*: .\*\*\*\*:

ENSMUEP00000013310\_Neug/1-956 REFLQKVHPR-KSAHNGFAKEFWEETFNCHLQEGSK---GSLTLDPLKREEGGRSRPN 322  
ENSTBEP00000002487\_Tbel/1-914 REFLQKVHPR-KSVHNGFAKEFWEETFNCHLQEGSK---GSLTLDPLKREEGGRSRPN 221  
ENSPCAP000000000755\_Pcap/1-1085 REFLQKVHPR-KSAHNGFAKEFWEETFNCHLQEGSK---GSLTLDPLKREEGGRSRPN 383  
ENSCHOP000000011907\_Chof/1-954 REFLQKVHPR-KSVHNGFAKEFWEETFNCHLQEGSK---GSLTLDPLKREEGGRSRPN 384  
ENSVVAP000000001982\_Vpac/1-1087 XXXXXXXXXXXXXXXXXXXXXXXXXXXXXXXXXXXXXXXXXXXXXXXXXXXXXXXXXXXX-XXX 388  
ENSEEUP000000009670\_Eeur/1-946 KEFLYDIHPS-KDPTDVLTEFVQTAFCNV----- 324  
ENSOANP00000015961\_Oana/1-1083 RQFLQKVHPR-RSPHNGFAKEFWEETFNCHLQEGSK---GPAAPDPLKREEGGRSRPN 385  
ENSOPRP000000000261\_Opri/1-1082 REFLQKVHPR-KSIHNGFAKEFWEETFNCHLQEGSK---GSLTLDPLKREEGGRSRPN 385  
ENSLJAP000000004721\_Jjac/1-1084 REFLQKVHPR-KSVHNGFAKEFWEETFNCHLQEGSK---GSLTLDPLKREEGGRSRPN 386  
ENSPDIP000000034747\_Pcin/1-1018 REFLQKVHPR-KSVHNGFAKEFWEETFNCHLQEGSK---GSLTLDPLKREEGGRSRPN 326  
ENSMODP000000022810\_Mdom/1-1069 REFLQKVHPR-KSVHNGFAKEFWEETFNCHLQEGSK---GSLTLDPLKREEGGRSRPN 386  
ENSVURP00010007344\_Vurs/1-1070 REFLQKVHPR-KSVHNGFAKEFWEETFNCHLQEGSK---GSLTLDPLKREEGGRSRPN 386  
ENSSHAP000000014890\_Shar/1-1072 REFLQKVHPR-KSVHNGFAKEFWEETFNCHLQEGSK---GSLTLDPLKREEGGRSRPN 386  
ENSMAP000000005394\_Maur/1-954 REFLQKVHPR-KSVHNGFAKEFWEETFNCHLQEGSK---GSLTLDPLKREEGGRSRPN 385  
ENSOCUP000000025672\_Ocun/1-1063 REFLQKVHPR-KSVHNGFAKEFWEETFNCHLQEGSK---GSLTLDPLKREEGGRSRPN 385  
ENSPVAP000000011981\_Pvam/1-1085 REFLQKVHPR-KSVHNGFAKEFWEETFNCHLQEGSK---GSLTLDPLKREEGGRSRPN 385  
ENSETEP000000011160\_Etel/1-1024 REFLQKVHPR-KSVHNGFAKEFWEETFNCHLQEGSK---GSLTLDPLKREEGGRSRPN 323  
ENSFADP000000010532\_Fdam/1-1108 REFLQKVHPR-KSVHNGFAKEFWEETFNCHLQEGSK---GSLTLDPLKREEGGRSRPN 413  
ENSODEP000000013257\_Odeg/1-1070 REFLQKVHPR-KSVHNGFAKEFWEETFNCHLQEGSK---GSLTLDPLKREEGGRSRPN 385  
ENSHGLP000000002019\_Hgfe/1-1108 REFLQKVHPR-KSVHNGFAKEFWEETFNCHLQEGSK---GSLTLDPLKREEGGRSRPN 413  
ENSCCLAP000000021334\_Clan/1-1114 REFLQKVHPR-KSAHNGFAKEFWEETFNCHLQEGSK---GSLTLDPLKREEGGRSRPN 413  
ENSCAPP000000014352\_Cape/1-1068 REFLQKVHPR-KSAHNGFAKEFWEETFNCHLQEGSK---GSLTLDPLKREEGGRSRPN 385  
ENSCPOP000000011705\_Cpor/1-1071 REFLQKVHPR-KSAHNGFAKEFWEETFNCHLQEGSK---GSLTLDPLKREEGGRSRPN 385  
ENSSARP000000006151\_Sara/1-1085 REFLQKVHPR-KSH-N-GLKEFREETFNCHLQEGSK---GSLTLDPLKREEGGRSRPN 383  
ENSLAFP000000018459\_Lafr/1-1090 REFLQKVHPR-KSVHNGFAKEFWEETFNCHLQEGSK---GSLTLDPLKREEGGRSRPN 385  
ENSDNOP000000011819\_Dnov/1-1075 REFLQKVHPR-KSVHNGFAKEFWEETFNCHLQEGSK---GSLTLDPLKREEGGRSRPN 385  
ENSSSCP000000041077\_Sscr/1-1089 REFLQKVHPR-KSVHNGFAKEFWEETFNCHLQEGSK---GSLTLDPLKREEGGRSRPN 385  
ENSTTRP000000001326\_Ttru/1-1091 REFLQKVHPR-KSVHNGFAKEFWEETFNCHLQEGSK---GSLTLDPLKREEGGRSRPN 385  
ENSBBP000000002858\_Bbbi/1-1068 REFLQKVHPR-KSVHNGFAKEFWEETFNCHLQEGSK---GSLTLDPLKREEGGRSRPN 386  
ENSOARP000000021602\_Oari/1-1032 REFLQKVHPR-KSVHNGFAKEFWEETFNCHLQEGSK---GSLTLDPLKREEGGRSRPN 386  
ENSCHIP000000033385\_Chir/1-1085 REFLQKVHPR-KSVHNGFAKEFWEETFNCHLQEGSK---GSLTLDPLKREEGGRSRPN 386  
ENSBTAP0000000059078\_Btau/1-1085 REFLQKVHPR-KSVHNGFAKEFWEETFNCHLQEGSK---GSLTLDPLKREEGGRSRPN 386  
ENSBIXP000000038534\_Bthy/1-1085 REFLQKVHPR-KSVHNGFAKEFWEETFNCHLQEGSK---GSLTLDPLKREEGGRSRPN 386  
ENSBMUP000000019115\_Bmut/1-1081 REFLQKVHPR-KSVHNGFAKEFWEETFNCHLQEGSK---GSLTLDPLKREEGGRSRPN 386  
ENSBIXP0000000530570\_Bihy/1-1085 REFLQKVHPR-KSVHNGFAKEFWEETFNCHLQEGSK---GSLTLDPLKREEGGRSRPN 386  
ENSMUGP000000006365\_Mung/1-1080 REFLQKVHPR-KSAHNGFAKEFWEETFNCHLQEGSK---GSLTLDPLKREEGGRSRPN 385  
ENSRNOP000000069629\_Rnor/1-1079 REFLQKVHPR-KSVHNGFAKEFWEETFNCHLQEGSK---GSLTLDPLKREEGGRSRPN 385  
MGP\_PahariEiJ\_P0028852\_Mpah/1-1003 REFLQKVHPR-KSVHNGFAKEFWEETFNCHLQEGSK---GSLTLDPLKREEGGRSRPN 385  
MGP\_SPRETEiJ\_P0043347\_Mspr/1-1079 REFLQKVHPR-KSVHNGFAKEFWEETFNCHLQEGSK---GSLTLDPLKREEGGRSRPN 385  
ENSMSP000000069080\_Mmus/1-1079 REFLQKVHPR-KSVHNGFAKEFWEETFNCHLQEGSK---GSLTLDPLKREEGGRSRPN 385  
ENSMOCP000000010340\_Moch/1-1076 REFLQKVHPR-KSVHNGFAKEFWEETFNCHLQEGSK---GSLTLDPLKREEGGRSRPN 385  
ENSPEMP000000029995\_Pmba/1-1076 REFLQKVHPR-KSVHNGFAKEFWEETFNCHLQEGSK---GSLTLDPLKREEGGRSRPN 385  
ENSCGRP00015024036\_Cgpi/1-1081 REFLQKVHPR-KSVHNGFAKEFWEETFNCHLQEGSK---GSLTLDPLKREEGGRSRPN 385  
ENSCGRP000001016053\_Cgch/1-1081 REFLQKVHPR-KSVHNGFAKEFWEETFNCHLQEGSK---GSLTLDPLKREEGGRSRPN 385  
ENSCGRP00000017369\_Cgcr/1-1081 REFLQKVHPR-KSVHNGFAKEFWEETFNCHLQEGSK---GSLTLDPLKREEGGRSRPN 385  
ENSDORP000000002959\_Dord/1-1078 REFLQKVHPR-KSVHNGFAKEFWEETFNCHLQEGSK---GSLTLDPLKREEGGRSRPN 385  
ENSTSY000000002643\_Csyz/1-1015 REFLQKVHPR-KSVHNGFAKEFWEETFNCHLQEGSK---GSLTLDPLKREEGGRSRPN 385  
ENSMUP000000008249\_Mluc/1-1075 REFLQKVHPR-K-SHNGFAKEFWEETFNCHLQEGSK---GSLTLDPLKREEGGRSRPN 384  
ENSECAP000000022285\_Ecab/1-1084 REFLQKVHPR-KSAHNGFAKEFWEETFNCHLQEGSK---GSLTLDPLKREEGGRSRPN 385  
ENSEASP000000022676\_Eaas/1-1094 REFLQKVHPR-KSAHNGFAKEFWEETFNCHLQEGSK---GSLTLDPLKREEGGRSRPN 385



ENSODRP00000002959\_Dord/1-1078 NSSTAFRPLCTGDENISSVETPYIDYTHLRISYNNVYLAVYSIAHALQD-IYTCPLPGRGLF 444  
ENSTSY00000002643\_Csyr/1-1015 NSSTFRPLCTGDENISSVETPYMDYTHLRISYNNVYLAVYSIAHALQD-IFTCLPGKGLF 444  
ENSMLUP00000008249\_Mluc/1-1075 NSSTVFRPLCTGDENISSVETPYMDYTHLRISYNNVYLAVYSIAHALQD-IYTCPLPGRGLF 443  
ENSECAP000000022285\_Ecab/1-1084 NSSTAFRPLCTGDENISSVETPYMDYTHLRISYNNVYLAVYSIAHALQD-IYTCSPGRGLF 444  
ENSEASP000000022676\_Baas/1-1094 NSSTAFRPLCTGDENISSVETPYMDYTHLRISYNNVYLAVYSIAHALQD-IYTCSPGRGLF 444  
ENSCAFP000000017381\_Cfmad/1-1075 NSSTAFRPLCTGDENISSVETPYMDYTHLRISYNNVYLAVYSIAHALQD-IYTCPLPGRGLF 444  
ENSCAFP000000007154\_Cldi/1-1075 NSSTAFRPLCTGDENISSVETPYMDYTHLRISYNNVYLAVYSIAHALQD-IYTCPLPGRGLF 444  
ENSVVUP000000030826\_Vvul/1-1075 NSSTAFRPLCTGDENISSVETPYMDYTHLRISYNNVYLAVYSIAHALQD-IYTCPLPGRGLF 444  
ENSFCA000000008080\_Fcat/1-1081 NSSTALRPLCTGDENISSVETPYMDYTHLRISYNNVYLAVYSIAHALQD-IYTCPLPGRGLF 444  
ENSPRRP000000023800\_Ppar/1-1081 NSSTALRPLCTGDENISSVETPYMDYTHLRISYNNVYLAVYSIAHALQD-IYTCPLPGRGLF 444  
ENSPTIP000000015042\_Ptal/1-1081 NSSTALRPLCTGDENISSVETPYMDYTHLRISYNNVYLAVYSIAHALQD-IYTCPLPGRGLF 444  
ENSMPPUP00000004759\_Mpfu/1-1082 NSSTAFRPLCTGDENISSVETPYMDYTHLRISYNNVYLAVYSIAHALQD-IYTCPLPGRGLF 444  
ENSNVIP000000018564\_Nvis/1-1092 NSSTAFRPLCTGDENISSVETPYMDYTHLRISYNNVYLAVYSIAHALQD-IYTCPLPGRGLF 444  
ENSUMAP000000035085\_Umar/1-1071 NSSTAFRPLCTGDENISSVETPYMDYTHLRISYNNVYLAVYSIAHALQD-IYTCPLPGRGLF 444  
ENSUAMP000000035930\_Uame/1-1079 NSSTAFRPLCTGDENISSVETPYMDYTHLRISYNNVYLAVYSIAHALQD-IYTCPLPGRGLF 444  
ENSAMEP000000015060\_Amel/1-1089 NSSTAFRPLCTGDENISSVETPYMDYTHLRISYNNVYLAVYSIAHALQD-IYTCPLPGRGLF 444  
ENSDDAP000000007437\_Sdau/1-1079 NSSTAFRPLCTGDENISSVETPYMDYTHLRISYNNVYLAVYSIAHALQD-IYTCPLPGRGLF 444  
ENSSTOP000000003945\_Itri/1-1070 NSSTAFRPLCTGDENISSVETPYMDYTHLRISYNNVYLAVYSIAHALQD-IYTCPLPGRGLF 444  
ENSMMP000000015298\_Mmma/1-1083 NSSTAFRPLCTGDENISSVETPYMDYTHLRISYNNVYLAVYSIAHALQD-IYTCPLPGRGLF 444  
ENSUPAP00000001025947\_Upar/1-1086 NSSTAFRPLCTGDENISSVETPYMDYTHLRISYNNVYLAVYSIAHALQD-IYTCPLPGRGLF 444  
ENSSBOP000000036416\_Sbbo/1-1078 NSSTAFRPLCTGDENISSVETPYIDYTHLRISYNNVYLAVYSIAHALQD-IYTCSPGRGLF 444  
ENSANAP000000028404\_Anan/1-1078 NSSSVFRPLCTGDENISSVETPYIDYTHLRISYNNVYLAVYSIAHALQD-IYTCSPGRGLF 444  
ENSCCAP000000024327\_Ccap/1-1077 NSSTAFRPLCTGDENISSVETPYIDYTHLRISYNNVYLAVYSIAHALQD-IYTCPLPGRGLF 444  
ENSCJAP000000062854\_Cjac/1-1089 NSSTAFRPLCTGDENISSVETPYIDYTHLRISYNNVYLAVYSIAHALQD-IYTCSPGRGLF 444  
ENSNLEP00000000336\_Nleu/1-1088 NSSTAFRPLCTGDENISSVETPYIDYTHLRISYNNVYLAVYSIAHALQD-IYTCPLPGRGLF 444  
ENSPYP0000000015087\_Pabe/1-1078 NSSTAFRPLCTGDENISSVETPYIDYTHLRISYNNVYLAVYSIAHALQD-IYTCPLPGRGLF 444  
ENSP000000420194\_Hsap/1-1088 NSSTAFRPLCTGDENISSVETPYIDYTHLRISYNNVYLAVYSIAHALQD-IYTCPLPGRGLF 444  
ENSGGP000000020287\_Ggor/1-1078 NSSTAFRPLCTGDENISSVETPYIDYTHLRISYNNVYLAVYSIAHALQD-IYTCPLPGRGLF 444  
ENSPAP000000026371\_Ppan/1-1078 NSSTAFRPLCTGDENISSVETPYIDYTHLRISYNNVYLAVYSIAHALQD-IYTCPLPGRGLF 444  
ENSPTRP000000043342\_Ptro/1-1078 NSSTAFRPLCTGDENISSVETPYIDYTHLRISYNNVYLAVYSIAHALQD-IYTCPLPGRGLF 444  
ENSCSAP000000003635\_Csab/1-882 NSSTAFRPLCTGDENISSVETPYIDYTHLRISYNNVYLAVYSIAHALQD-IYTCPLPGRGLF 444  
ENSMMP000000061002\_Mmul/1-1078 NSSTAFRPLCTGDENISSVETPYIDYTHLRISYNNVYLAVYSIAHALQD-IYTCPLPGRGLF 444  
ENSPANP00000004316\_Panu/1-1081 NSSTAFRPLCTGDENISSVETPYIDYTHLRISYNNVYLAVYSIAHALQD-IYTCPLPGRGLF 437  
ENSCATP000000028615\_Caty/1-1078 NSSTAFRPLCTGDENISSVETPYIDYTHLRISYNNVYLAVYSIAHALQD-IYTCPLPGRGLF 444  
ENSMFAP000000042132\_Mfas/1-1078 NSSTAFRPLCTGDENISSVETPYIDYTHLRISYNNVYLAVYSIAHALQD-IYTCPLPGRGLF 444  
ENSMNEP000000024602\_Mnem/1-1078 NSSTAFRPLCTGDENISSVETPYIDYTHLRISYNNVYLAVYSIAHALQD-IYTCPLPGRGLF 444  
ENSMLEP000000008744\_Mleu/1-1088 NSSTAFRPLCTGDENISSVETPYIDYTHLRISYNNVYLAVYSIAHALQD-IYTCPLPGRGLF 444  
ENSTGEP000000008766\_Tgel/1-1088 NSSTAFRPLCTGDENISSVETPYIDYTHLRISYNNVYLAVYSIAHALQD-IYTCPLPGRGLF 444  
ENSCANP000000040262\_Capa/1-1088 NSSTAFRPLCTGDENISSVETPYIDYTHLRISYNNVYLAVYSIAHALQD-IYTCPLPGRGLF 444  
ENSPTEP000000016080\_Ptep/1-1088 NSSTAFRPLCTGDENISSVETPYIDYTHLRISYNNVYLAVYSIAHALQD-IYTCPLPGRGLF 444  
ENSRBIP000000006831\_Rbie/1-1078 NSSTAFRPLCTGDENISSVETPYIDYTHLRISYNNVYLAVYSIAHALQD-IYTCPLPGRGLF 444  
ENSRROP000000007818\_Rrox/1-1088 NSSTAFRPLCTGDENISSVETPYIDYTHLRISYNNVYLAVYSIAHALQD-IYTCPLPGRGLF 444  
ENSGOAP000000002850\_Ogar/1-1077 NSSTAFRPLCTGDENISSVETPYMDYTHLRISYNNVYLAVYSIAHALQD-IYTCPLPGRGLF 444  
ENSMICP000000050654\_Mmur/1-1075 NSSTAFRPLCTGDENISSVETPYMDYTHLRISYNNVYLAVYSIAHALQD-IYTCPLPGRGLF 444  
ENSPCOP000000009624\_Pcod/1-1076 NSSTAFRPLCTGDENISSVETPYMDYTHLRISYNNVYLAVYSIAHALQD-IYTCPLPGRGLF 444  
ENSPSPM000000007909\_Psim/1-1084 NSSTAFRPLCTGDENISSVETPYMDYTHLRISYNNVYLAVYSIAHALQD-IYTCPLPGRGLF 444

ENSMEUP000000013310\_Neug/1-956 TNGSCADIKKVEAWQVXXXXXXXXXXXXXXXXXXXXXXXXXXXXXXXXXXXXXXXXXXXXXXXXXXXX 441  
ENSTBEP00000002487\_Tbel/1-914 TNGSCADIKKVEAWQVXXXXXXXXXXXXXXXXXXXXXXXXXXXXXXXXXXXXXXXXXXXXXXXXXXXX-XXX-- 337  
ENSPCAP000000000755\_Pcap/1-1085 XXXXXXXXXXXXXXXXXXXXXXXXXXXXXXXXXXXXXXXXXXXXXXX-XXXXXXXXXXXXXXXXXXXXXXX-- 499  
ENSCHOP000000011907\_Chof/1-954 TNGSCADIKKVEAWQVXXXXXXXXXXXXXXXXXXXXXXXXXXXXXXXXXXXXXXXXXXXXXXXXXXXX 502  
ENSVAP000000001982\_Vpac/1-1087 XXXXXXXXXXXXXXXXXXXVXXXXXXXXXXXXXXXXXXXXXXXXXXXXXXXXXXXXXXXXXXXXXXXXXXXX 502  
ENSEEUP000000009670\_Eeur/1-946 -----LKLHRLHNFNTNMGEQ-VTFDECGDLVGNYSI INWHLSPEDGSI 367  
ENSOANP000000015961\_Oana/1-1083 TNGSCADIKKVEAWQVXXXXXXXXXXXXXXXXXXXXXXXXXXXXXXXXXXXXXXXXXXXXXXXXXXXX 503  
ENSOPRP00000000261\_Opri/1-1082 TNGSCADIKKVEAWQVXXXXXXXXXXXXXXXXXXXXXXXXXXXXXXXXXXXXXXXXXXXXXXXXXXXX 503  
ENSJJAP000000004721\_Jjac/1-1084 TNGSCADIKKVEAWQVXXXXXXXXXXXXXXXXXXXXXXXXXXXXXXXXXXXXXXXXXXXXXXXXXXXX 504  
ENSFCIP000000034747\_Pcin/1-1018 TNGSCADIKKVEAWQVXXXXXXXXXXXXXXXXXXXXXXXXXXXXXXXXXXXXXXXXXXXXXXXXXXXX 444  
ENSMODP000000022810\_Mdom/1-1069 TNGSCADIKKVEAWQVXXXXXXXXXXXXXXXXXXXXXXXXXXXXXXXXXXXXXXXXXXXXXXXXXXXX 504  
ENSVURP000000007344\_Vurs/1-1070 TNGSCADIKKVEAWQVXXXXXXXXXXXXXXXXXXXXXXXXXXXXXXXXXXXXXXXXXXXXXXXXXXXX 504  
ENSSHAP000000014890\_Shar/1-1072 TNGSCADIKKVEAWQVXXXXXXXXXXXXXXXXXXXXXXXXXXXXXXXXXXXXXXXXXXXXXXXXXXXX 504  
ENSMAPU000000005394\_Maur/1-954 TNGSCADIKKVEAWQVXXXXXXXXXXXXXXXXXXXXXXXXXXXXXXXXXXXXXXXXXXXXXXXXXXXX 487  
ENSOCUP000000025672\_Ocun/1-1063 ANGSCADIKKVEAWQVXXXXXXXXXXXXXXXXXXXXXXXXXXXXXXXXXXXXXXXXXXXXXXXXXXXX 503  
ENSPVAP000000011981\_Pvam/1-1085 TNGSCADIKKVEAWQVXXXXXXXXXXXXXXXXXXXXXXXXXXXXXXXXXXXXXXXXXXXXXXXXXXXX 503  
ENSETEP000000011160\_Etel/1-1024 TNGSCADIKKVEAWQVXXXXXXXXXXXXXXXXXXXXXXXXXXXXXXXXXXXXXXXXXXXXXXXXXXXX 441  
ENSFDA000000010532\_Fdam/1-1108 TNGSCADIKKVEAWQVXXXXXXXXXXXXXXXXXXXXXXXXXXXXXXXXXXXXXXXXXXXXXXXXXXXX 531  
ENSODEP000000013257\_Odeg/1-1070 TNSCADIKKVEAWQVXXXXXXXXXXXXXXXXXXXXXXXXXXXXXXXXXXXXXXXXXXXXXXXXXXXX 503  
ENSHGLP00000002019\_Hgfe/1-1108 TNGSCADIKKVEAWQVXXXXXXXXXXXXXXXXXXXXXXXXXXXXXXXXXXXXXXXXXXXXXXXXXXXX 531  
ENSLAP000000021334\_Clan/1-1114 TNGSCADIKKVEAWQVXXXXXXXXXXXXXXXXXXXXXXXXXXXXXXXXXXXXXXXXXXXXXXXXXXXX 531  
ENSCAPP000000014352\_Cape/1-1068 TNGSCADIKKVEAWQVXXXXXXXXXXXXXXXXXXXXXXXXXXXXXXXXXXXXXXXXXXXXXXXXXXXX 503  
ENSCPOP000000011705\_Cpor/1-1071 TNGSCADIKKVEAWQVXXXXXXXXXXXXXXXXXXXXXXXXXXXXXXXXXXXXXXXXXXXXXXXXXXXX 503  
ENSSARP000000006151\_Sara/1-1085 TNGSCADIKKVEAWQVXXXXXXXXXXXXXXXXXXXXXXXXXXXXXXXXXXXXXXXXXXXXXXXXXXXX 501  
ENSLAFP000000018459\_Lafr/1-1090 TNGSCADIKKVEAWQVXXXXXXXXXXXXXXXXXXXXXXXXXXXXXXXXXXXXXXXXXXXXXXXXXXXX 503  
ENSDNOP000000011819\_Dnov/1-1075 TNGSCADIKKVEAWQVXXXXXXXXXXXXXXXXXXXXXXXXXXXXXXXXXXXXXXXXXXXXXXXXXXXX 503  
ENSSSCP000000041077\_Sscr/1-1089 TNGSCADIKKVEAWQVXXXXXXXXXXXXXXXXXXXXXXXXXXXXXXXXXXXXXXXXXXXXXXXXXXXX 503  
ENSTTRP000000001326\_Ttru/1-1091 TNGSCADIKKVEAWQVXXXXXXXXXXXXXXXXXXXXXXXXXXXXXXXXXXXXXXXXXXXXXXXXXXXX 503  
ENSBEBP000000002858\_Bbbi/1-1068 TNGSCADIKKVEAWQVXXXXXXXXXXXXXXXXXXXXXXXXXXXXXXXXXXXXXXXXXXXXXXXXXXXX 504  
ENSOARP000000021602\_Oari/1-1032 TNGSCADIKKVEAWQVXXXXXXXXXXXXXXXXXXXXXXXXXXXXXXXXXXXXXXXXXXXXXXXXXXXX 504  
ENSHIP000000033385\_Chir/1-1085 TNGSCADIKKVEAWQVXXXXXXXXXXXXXXXXXXXXXXXXXXXXXXXXXXXXXXXXXXXXXXXXXXXX 504  
ENSBTAP000000059078\_Btau/1-1085 TNGSCADIKKVEAWQVXXXXXXXXXXXXXXXXXXXXXXXXXXXXXXXXXXXXXXXXXXXXXXXXXXXX 504  
ENSBIXP000000038534\_Bthy/1-1085 TNGSCADIKKVEAWQVXXXXXXXXXXXXXXXXXXXXXXXXXXXXXXXXXXXXXXXXXXXXXXXXXXXX 504  
ENSBMUP000000019115\_Bmut/1-1081 TNGSCADIKKVEAWQVXXXXXXXXXXXXXXXXXXXXXXXXXXXXXXXXXXXXXXXXXXXXXXXXXXXX 504  
ENSBIXP000000030570\_Bihy/1-1085 TNGSCADIKKVEAWQVXXXXXXXXXXXXXXXXXXXXXXXXXXXXXXXXXXXXXXXXXXXXXXXXXXXX 504  
ENSMGUP000000006365\_Mung/1-1080 TNGSCADIKKVEAWQVXXXXXXXXXXXXXXXXXXXXXXXXXXXXXXXXXXXXXXXXXXXXXXXXXXXX 503  
ENSRNOP000000006929\_Rnor/1-1079 TNGSCADIKKVEAWQVXXXXXXXXXXXXXXXXXXXXXXXXXXXXXXXXXXXXXXXXXXXXXXXXXXXX 503  
MGP\_PahariEiJ\_P0028852\_Mpah/1-1003 TNGSCADIKKVEAWQVXXXXXXXXXXXXXXXXXXXXXXXXXXXXXXXXXXXXXXXXXXXXXXXXXXXX 459  
MGP\_SPRETEiJ\_P0043347\_Mspr/1-1079 TNGSCADIKKVEAWQVXXXXXXXXXXXXXXXXXXXXXXXXXXXXXXXXXXXXXXXXXXXXXXXXXXXX 503  
ENSMSP0000000069080\_Mmus/1-1079 TNGSCADIKKVEAWQVXXXXXXXXXXXXXXXXXXXXXXXXXXXXXXXXXXXXXXXXXXXXXXXXXXXX 503

ENSMOCP00000010340\_Moch/1-1076 TNGSCADIKKVEAWQVLKHLRHLNFTNNMGEQ-VTFDECGLVGNYSI INWHLSPEDGSI 503  
ENSPEMP00000029995\_Pmba/1-1076 TNGSCADIKKVEAWQVLKHLRHLNFTNNMGEQ-VTFDECGLVGNYSI INWHLSPEDGSI 503  
ENSCGRP000015024036\_Cgpi/1-1081 TNGSCADIKKVEAWQVLKHLRHLNFTNNMGEQ-VAFDECGLVGNYSI INWHLSPEDGSI 503  
ENSCGRP000001016053\_Cgch/1-1081 TNGSCADIKKVEAWQVLKHLRHLNFTNNMGEQ-VAFDECGLVGNYSI INWHLSPEDGSI 503  
ENSCGRP00000017369\_Cgcr/1-1081 TNGSCADIKKVEAWQVLKHLRHLNFTNNMGEQ-VAFDECGLVGNYSI INWHLSPEDGSI 503  
ENSDORP00000002959\_Dord/1-1078 TNGSCADIKKVEAWQVLKHLRHLNFTNNMGEQ-VTFDECGLMGNYSI INWHLSPEDGSI 503  
ENSTSPY00000002643\_Csyr/1-1015 TNGSCADIKKVEAWQVLKHLRHLNFTNNMGEW-VTFDECGLVGNYSI INWHLSPEDGSI 503  
ENSMLUP000000008249\_Mluc/1-1075 TNGSCADIKKVEAWQVLKHLRHLNFTNNMGEQ-VTFDECGLVGNYSI INWHLSPEDGSI 502  
ENSECAP00000022285\_Ecab/1-1084 TNGSCADIKKVEAWQVLKHLRHLNFTNNMGEQ-VTFDECGLVGNYSI INWHLSPEDGSI 503  
ENSEASP000005022676\_Eaas/1-1094 TNGSCADIKKVEAWQVLKHLRHLNFTNNMGEQ-VTFDECGLVGNYSI INWHLSPEDGSI 503  
ENSCAFP000000017381\_Cfam/1-1075 TNGSCADIKKVEAWQVLKHLRHLNFTNNMGEQ-VTFDECGLMGNYSI INWHLSPEDGSI 503  
ENSCAFP000020007154\_Cldi/1-1075 TNGSCADIKKVEAWQVLKHLRHLNFTNNMGEQ-VTFDECGLMGNYSI INWHLSPEDGSI 503  
ENSVVUP00000030826\_Vvul/1-1075 TNGSCADIKKVEAWQVLKHLRHLNFTNNMGEQ-VTFDECGLMGNYSI INWHLSPEDGSI 503  
ENSFCAP000000008080\_Fcat/1-1081 TNGSCADIKKVEAWQVLKHLRHLNFTNNMGEQ-VTFDECGLVGNYSI INWHLSPEDGSI 503  
ENSPRP00000023800\_Ppar/1-1081 TNGSCADIKKVEAWQVLKHLRHLNFTNNMGEQ-VTFDECGLVGNYSI INWHLSPEDGSI 503  
ENSPPTI00000015042\_Ptal/1-1081 TNGSCADIKKVEAWQVLKHLRHLNFTNNMGEQ-VTFDECGLVGNYSI INWHLSPEDGSI 503  
ENSMUP000000004759\_Mpfl/1-1082 TNGSCADIKKVEAWQVLKHLRHLNFTNNMGEQ-VTFDECGLMGNYSI INWHLSPEDGSI 503  
ENSNVIP00000018564\_Nvis/1-1092 TNGSCADIKKVEAWQVLKHLRHLNFTNNMGEQ-VTFDECGLMGNYSI INWHLSPEDGSI 503  
ENSUMAP00000035085\_Umar/1-1071 TNGSCADIKKVEAWQVLKHLRHLNFTNNMGEQ-VTFDECGLMGNYSI INWHLSPEDGSI 503  
ENSUAMP000000035930\_Uame/1-1079 TNGSCADIKKVEAWQVLKHLRHLNFTNNMGEQ-VTFDECGLMGNYSI INWHLSPEDGSI 503  
ENSAMEP00000015060\_Amel/1-1089 TNGSCADIKKVEAWQVLKHLRHLNFTNNMGEQ-VTFDECGLMGNYSI INWHLSPEDGSI 503  
ENSSDAP00000007437\_Sdau/1-1079 TNGSCADIKKVEAWQVLKHLRHLNFTNNMGEQ-VTFDECGLVGNYSI INWHLSPEDGSI 503  
ENSTTOP000000003945\_Itri/1-1070 TNGSCADIKKVEAWQVLKHLRHLNFTNNMGEQ-VTFDECGLVGNYSI INWHLSPEDGSI 503  
ENSMMP00000015298\_Mmma/1-1083 TNGSCADIKKVEAWQVLKHLRHLNFTNNMGEQ-VTFDECGLVGNYSI INWHLSPEDGSI 503  
ENSUPAP000010025947\_Upar/1-1086 TNGSCADIKKVEAWQVLKHLRHLNFTNNMGEQ-VTFDECGLVGNYSI INWHLSPEDGSI 503  
ENSSBOP000000036416\_Sbbo/1-1078 TNGSCADIKKVEAWQVLKHLRHLNFTNNMGEQ-VTFDECGLVGNYSI INWHLSPEDGSI 503  
ENSANAP00000028404\_Anan/1-1078 TNGSCADIKKVEAWQVLKHLRHLNFTNNMGEQ-VTFDECGLVGNYSI INWHLSPEDGSI 503  
ENSCCAP00000024327\_Ccap/1-1077 TNGSCADIKKVEAWQVLKHLRHLNFTNNMGEQ-VTFDECGLVGNYSI INWHLSPEDGSI 503  
ENSCJAP000000062854\_Cjac/1-1089 TNGSCADIKKVEAWQVLKHLRHLNFTNNMGEQ-VTFDECGLVGNYSI INWHLSPEDGSI 503  
ENSNLEP00000000336\_Nleu/1-1088 TNGSCADIKKVEAWQVLKHLRHLNFTNNMGEQ-VTFDECGLVGNYSI INWHLSAEDGSI 503  
ENSPYP00000015087\_Pabe/1-1078 TNGSCADIKKVEAWQVLKHLRHLNFTNNMGEQ-VTFDECGLVGNYSI INWHLSPEDGSI 503  
ENSP00000420194\_Hsap/1-1088 TNGSCADIKKVEAWQVLKHLRHLNFTNNMGEQ-VTFDECGLVGNYSI INWHLSPEDGSI 503  
ENSGGOP00000020287\_Ggor/1-1078 TNGSCADIKKVEAWQVLKHLRHLNFTNNMGEQ-VTFDECGLVGNYSI INWHLSPEDGSI 503  
ENSPAP00000026371\_Ppan/1-1078 TNGSCADIKKVEAWQVLKHLRHLNFTNNMGEQ-VTFDECGLVGNYSI INWHLSPEDGSI 503  
ENSPTRP0000000043342\_Ptro/1-1078 TNGSCADIKKVEAWQVLKHLRHLNFTNNMGEQ-VTFDECGLVGNYSI INWHLSPEDGSI 503  
ENSCSAP00000003635\_Csab/1-882 TNGSCADIKKVEAWQVLKHLRHLNFTNNMGEQ-VTFDECGLVGNYSI INWHLSPEDGSI 307  
ENSMUP000000061002\_Mmul/1-1078 TNGSCADIKKVEAWQVLKHLRHLNFTNNMGEQ-VTFDECGLVGNYSI INWHLSPEDGSI 503  
ENSPANP000000004316\_Panu/1-1081 TNGSCADIKKVEAWQVLKHLRHLNFTNNMGEQ-VTFDECGLVGNYSI INWHLSPEDGSI 496  
ENSCATP00000028615\_Caty/1-1078 TNGSCADIKKVEAWQVLKHLRHLNFTNNMGEQ-VTFDECGLVGNYSI INWHLSPEDGSI 503  
ENSMFAP000000042132\_Mfas/1-1078 TNGSCADIKKVEAWQVLKHLRHLNFTNNMGEQ-VTFDECGLVGNYSI INWHLSPEDGSI 503  
ENSMNEP000000024602\_Mnem/1-1078 TNGSCADIKKVEAWQVLKHLRHLNFTNNMGEQ-VTFDECGLVGNYSI INWHLSPEDGSI 503  
ENSMLEP00000008744\_Mleu/1-1088 TNGSCADIKKVEAWQVLKHLRHLNFTNNMGEQ-VTFDECGLVGNYSI INWHLSPEDGSI 503  
ENSTGEP00000008766\_Tgel/1-1088 TNGSCADIKKVEAWQVLKHLRHLNFTNNMGEQ-VTFDECGLVGNYSI INWHLSPEDGSI 503  
ENSCANP000000040262\_Capa/1-1088 TNGSCADIKKVEAWQVLKHLRHLNFTNNMGEQ-VTFDECGLVGNYSI INWHLSPEDGSI 503  
ENSPTEP00000016080\_Ptep/1-1088 TNGSCADIKKVEAWQVLKHLRHLNFTNNMGEQ-VTFDECGLVGNYSI INWHLSPEDGSI 503  
ENSRBIP00000006831\_Rbie/1-1078 TNGSCADIKKVEAWQVLKHLRHLNFTNNMGEQ-VTFDECGLVGNYSI INWHLSPEDGSI 503  
ENSRROP000000007818\_Rrox/1-1088 TNGSCADIKKVEAWQVLKHLRHLNFTNNMGEQ-VTFDECGLVGNYSI INWHLSPEDGSI 503  
ENSOGAP00000002850\_Ogar/1-1077 TNGSCADIKKVEAWQVLKHLRHLNFTNNMGEQ-VTFDECGLMGNYSI INWHLSPEDSSI 503  
ENSMICP000000050654\_Mmur/1-1075 TNGSCADIKKVEAWQVLKHLRHLNFTNNMGEQ-VTFDECGLVGNYSI INWHLSPEDGSI 503  
ENSPCOP000000009624\_Pcog/1-1076 TNGSCADIKKVEAWQVLKHLRHLNFTNNMGEQ-VTFDECGLVGNYSI INWHLSPEDGSI 503  
ENSPSPM00000007909\_Psim/1-1084 TNGSCADIKKVEAWQVLKHLRHLNFTNNMGEQ-VTFDECGLVGNYSI INWHLSPEDGSI 503

ENSMEUP00000013310\_Neug/1-956 -XX--XXXXXXXXXXXXXXXXXXXXXXXXXXXXXFIFFLMLKVPFNSCSRCLAGTR 497  
ENSTBEP00000002487\_The/1-914 -XXXXXXXXXXXXXXXXXXXXXXXXXXXXXPFIFMLSVQVPFNSCSRCLAGTR 396  
ENSPCAP00000000755\_Pcap/1-1085 -XXXXXXXXXXXXXXXXXXXXXXXXXXXXXSLFLLSVQVPFNSCSRCLAT-R 557  
ENSCGOP00000011907\_Chof/1-954 VFKEVGNVYAKKGE-RLFINEEKILWSGFSREPLILVLC-VLQVPFNSCSRCLAGTR 560  
ENSVAP00000001982\_Vpac/1-1087 VFKEVGNVYAKKGE-RLFINEEKILWSGFSREPLTVVLS-IFQVPFNSCSRCLAGTR 560  
ENSEEUP00000009670\_Eeur/1-946 MFKEVGNVYAKKGE-RLFINEEKILWSGFSREPLTVVLS-VLQVPFNSCSRCLAGTR 425  
ENSOANP00000015961\_Oana/1-1083 EFEEVGNVYAKKGE-RLFVNEKILWSGFSRE-----VPSNSCRCLAGTR 551  
ENSOBRP00000000261\_Opri/1-1082 MXXXXXXXXXXXXXXXXXXXXXXXXXXXXX-----XXXXXXXXXXXXXXXXXXXX 558  
ENSJJAP00000004721\_Jjac/1-1084 MFKEVGNVYAKKGE-RLFINEEKILWSGFSREVRANCQ----- 544  
ENSPCIP00000034747\_Pcin/1-1018 VFKEVGNVYAKKGE-RLFINEEKILWSGFSREVCTE----YKVPFNSCSRCLAGTR 499  
ENSMODP00000022810\_Mdom/1-1069 VFKEVGNVYAKKGE-RLFINEEKILWSGFSRE-----VPSNSCRCLAGTR 552  
ENSVURP000010007344\_Vurs/1-1070 VFKEVGNVYAKKGE-RLFINEEKILWSGFSRE-----VPSNSCRCLAGTR 552  
ENSSHAP00000014890\_Shar/1-1072 VFKEVGNVYAKKGE-RLFINEEKILWSGFSRE-----VPSNSCRCLAGTR 552  
ENSMaup000000005394\_Maur/1-954 LFAVSLIFLLGLEFSI-HLFIYSLI-----IYV----- 514  
ENSOCUP00000025672\_Ocun/1-1063 MFKEVGNVYAKKGE-RLFINEEKILWSGFSRE-----VPSNSCRCLAGTR 551  
ENSPVAP00000011981\_Pvam/1-1085 VFKEVGNVYAKKGE-RLFINEEKILWSGFSREPVFV-LSVLQVPFNSCSRCLAGTR 561  
ENSETEP00000011160\_Etel/1-1024 MFKEVGNVYAKKGE-RLFIXXXXXXXXXXXXXPLT---LPVLQVPFNSCSRCLAGTR 497  
ENSFAP00000010532\_Fdam/1-1108 VFKEIGNVYAKKGE-RLFINEEKILWSGFSRE-----VPSNSCRCLAGTR 579  
ENSODEP00000013257\_Odeg/1-1070 MFKEIGNVYAKKGE-RLFINEKILWNGFSRE-----VPSNSCRCLAGTR 551  
ENSHGLP00000002019\_Hgfe/1-1108 MFKEIGNVYAKKGE-RLFINEEKILWSGFSRE-----VPSNSCRCLAGTR 579  
ENSLAP00000021334\_Clan/1-1114 MFKEIGNVYAKKGE-RLFINEKILWNGFSRE-----VPSNSCRCLAGTR 579  
ENSCAPP00000014352\_Cape/1-1068 VFKEIGNVYAKKGE-RLFIDEKILWSGFSRE-----VPSNSCRCLAGTR 551  
ENSCPOP00000011705\_Cpor/1-1071 MFKEIGNVYAKKGE-RLFINEKILWSGFSRE-----VPSNSCRCLAGTR 551  
ENSSARP00000006151\_Sara/1-1085 VFKEVGNVYAKKGE-RLFINEEKILWSGFSREPLTFVIS--ILVFPFNSCSRCLAGTR 558  
ENSLAFP00000018459\_Lafr/1-1090 VFKEVGNVYAKKGE-RLFINEEKILWSGFSREPHSLRALCPQVPFNSCSRCLAGTR 562  
ENSDNOP00000011819\_Dnov/1-1075 VFKEVGNVYAKKGE-RLFINEEKILWSGFSRE-----VPSNSCRCLAGTR 551  
ENSSSCP00000041077\_Sscr/1-1089 VFKEVGNVYAKKGE-RLFINEEKILWSGFSREPLTVVLP-LQVPFNSCSRCLAGTR 561  
ENSTTRP00000001326\_Ttru/1-1091 VFKEVGNVYAKKGE-RLFINEEKILWSGFSREPLTVIVSV-LQVPFNSCSRCLAGTR 561  
ENSBBP000000002858\_Bbbi/1-1068 VFKEVGNVYAKKGE-RLFINEEKILWSGFSREVSPLCCNLRQVPFNSCSRCLAGTR 563  
ENSOARP00000021602\_Oari/1-1032 VFKEVGNVYAKKGE-RLFINEEKILWSGFSRE-----VPSNSCRCLAGTR 552  
ENSCHIP00000033385\_Chir/1-1085 VFKEVGNVYAKKGE-RLFINEEKILWSGFSRE-----VPSNSCRCLAGTR 552  
ENSBTAP000000059078\_Btau/1-1085 VFKEVGNVYAKKGE-RLFINEEKILWSGFSRE-----VPSNSCRCLAGTR 552  
ENSBIXP00000038534\_Bthy/1-1085 VFKEVGNVYAKKGE-RLFINEEKILWSGFSRE-----VPSNSCRCLAGTR 552  
ENSBMUP00000019115\_Bmut/1-1081 VFKEVGNVYAKKGE-RLFINEEKILWSGFSRE-----VPSNSCRCLAGTR 552  
ENSBIXP0000005030570\_Bihy/1-1085 VFKEVGNVYAKKGE-RLFINEEKILWSGFSRE-----VPSNSCRCLAGTR 552

ENSMUGP0000006365\_Mung/1-1080 VFKEVGYNGNARKGD-RLFINEEKILWNGFSRE-----VPFSNCSRDCLAGTR 551  
ENSRNOP0000006929\_Rnor/1-1079 VFKEVGYNVYAKKGE-RLFINEEKILWSGFSRE-----VPFSNCSRDCQAGTR 551  
MGP\_PahariEiJ\_P0028852\_Mpah/1-1003 -----VPFSNCSRDCQAGTR 474  
MGP\_SPRETEiJ\_P0043347\_Mspr/1-1079 VFKEVGYNVYAKKGE-RLFINEGKILWSGFSRE-----VPFSNCSRDCQAGTR 551  
ENSMUSP00000069080\_Mmus/1-1079 VFKEVGYNVYAKKGE-RLFINEGKILWSGFSRE-----VPFSNCSRDCQAGTR 551  
ENSMOCP00000010340\_Moch/1-1076 VFKEVGHYNAYAKKGE-RLFINEEKILWSGFSRE-----VPFSNCSRDCLAGTR 551  
ENSPEMP00000029995\_Pmba/1-1076 VFKEVGHYNVYAKKGE-RLFINEEKILWSGFSRE-----VPFSNCSRDCLAGTR 551  
ENSCGRP00015024036\_Cgpi/1-1081 VFREVGHYNNVNAKKE-RLFINEEKILWSGFSRE-----VPFSNCSRDCLAGTR 551  
ENSCGRP00001016053\_Cgch/1-1081 VFREVGHYNNVNAKKE-RLFINEEKILWSGFSRE-----VPFSNCSRDCLAGTR 551  
ENSCGRP00000017369\_Cgcr/1-1081 VFREVGHYNNVNAKKE-RLFINEEKILWSGFSRE-----VPFSNCSRDCLAGTR 551  
ENSDORP00000002959\_Dord/1-1078 VFKEVGYNVYAKKGE-RLFINEEKILWSGFSRE-----VPFSNCSRDCLAGTR 551  
ENSTSY00000002643\_Csyr/1-1015 MFKEVGYNVYAKKGE-RLFINEEKILWSGFSREPLTFVLSI-FQVVPFSNCSRDCLAGTR 561  
ENSMMLUP00000008249\_Mluc/1-1075 VFKEVGYNVYAKKGE-RLFINEEKILWSGFSRE-----VPFSNCSRVCLEGTR 550  
ENSECAP000000022285\_Ecab/1-1084 VFKEVGYNVYAKKGE-RLFINEEKILWSGFSRE-----VPFSNCSRDCLAGTR 551  
ENSEASP00000022676\_Eaas/1-1094 VFKEVGYNVYAKKGE-RLFINEEKILWSGFSREPLTSVLSI-FQVVPFSNCSRDCLAGTR 561  
ENSCAFP00000017381\_Cfam/1-1075 VFKEVGYNVYAKKGE-RLFINEEKILWSGFSRE-----VPFSNCSRDCLAGTR 551  
ENSCAFP00020007154\_Cldi/1-1075 VFKEVGYNVYAKKGE-RLFINEEKILWSGFSRE-----VPFSNCSRDCLAGTR 551  
ENSVVUP00000030826\_Vvul/1-1075 VFKEVGYNVYAKKGE-RLFINEEKILWSGFSRE-----VPFSNCSRDCLAGTR 551  
ENSFCA00000008080\_Fcat/1-1081 VFKEVGYNVYAKKGE-RLFINEEKILWSGFSRE-----VPFSNCSRDCLAGTR 551  
ENSPRRP000000023800\_Ppar/1-1081 VFKEVGYNVYAKKGE-RLFINEEKILWSGFSRE-----VPFSNCSRDCLAGTR 551  
ENSPPIP00000015042\_Ptal/1-1081 VFKEVGYNVYAKKGE-RLFINEEKILWSGFSRE-----VPFSNCSRDCLAGTR 551  
ENSMMPUP00000004759\_Mpfi/1-1082 VFKEVGYNVYAKKGE-RLFINEEKILWSGFSRE-----VPFSNCSRDCLAGTR 551  
ENSNVIP000000015060\_Nvis/1-1092 VFKEVGYNVYAKKGE-RLFINEEKILWSGFSREPLTFVLSV-LQVVPFSNCSRDCLAGTR 561  
ENSUMAP00000035085\_Umar/1-1071 VFKEVGYNVYAKKGE-RLFINEEKILWSGFSREPLTFVLSV-LQVVPFSNCSRDCLAGTR 561  
ENSUAMP00000035930\_Uame/1-1079 VFKEVGYNVYAKKGE-RLFINEEKILWSGFSRE-----VPFSNCSRDCLAGTR 551  
ENSAMEP000000015060\_Amel/1-1089 VFKEVGYNVYAKKGE-RLFINEEKILWSGFSREPLTFVLSV-LQVVPFSNCSRDCLAGTR 561  
ENSSDAP00000007437\_Sdau/1-1079 VFKEVGYNVYAKKGE-RLFINEEKILWSGFSRE-----VPFSNCSRDCLAGTR 551  
ENSSTOP00000003945\_Itri/1-1070 VFKEVGYNVYAKKGE-RLFINEEKILWSGFSRE-----VPFSNCSRDCLAGTR 551  
ENSMMP000000015298\_Mmma/1-1083 VFKEVGHYNNVYAKKGE-RLFINEEKILWSGFSRE-----VPFSNCSRDCLAGTR 551  
ENSUPAP00010025947\_Upar/1-1086 MFKEVGYNVYAKKGE-RLFINEEKILWSGFSRE-----VPFSNCSRDCLAGTR 551  
ENSSBOP00000036416\_Sbbo/1-1078 MFKEVGYNVYAKKGE-RLFINEEKILWSGFSRE-----VPFSNCSRDCLAGTR 551  
ENSANAP000000028404\_Anan/1-1078 MFKEVGYNVYAKKGE-RLFINEEKILWSGFSRE-----VPFSNCSRDCLAGTR 551  
ENSCCAP00000024327\_Ccap/1-1077 MFKEVGYNVYAKKGE-RLFINEEKILWSGFSRE-----VPFSNCSRDCLAGTR 551  
ENSCJAP00000062854\_Cjac/1-1089 MFKEVGYNVYAKKGE-RLFINEEKILWSGFSREPLTFVLLV-LQVVPFSNCSRDCLAGTR 561  
ENSNLEP000000003360\_Nleu/1-1088 VFKEVGYNVYAKKGE-RLFINEEKILWSGFSREPLTFVLSV-FQVVPFSNCSRDCLAGTR 561  
ENSPYP00000015087\_Pabe/1-1078 VFKEVGYNVYAKKGE-RLFINEEKILWSGFSRE-----VPFSNCSRDCLAGTR 551  
ENSP00000420194\_Hsap/1-1088 VFKEVGYNVYAKKGE-RLFINEEKILWSGFSREPLTFVLSV-LQVVPFSNCSRDCLAGTR 561  
ENSGGOP000000020287\_Ggor/1-1078 VFKEVGYNVYAKKGE-RLFINEEKILWSGFSRE-----VPFSNCSRDCLAGTR 551  
ENSPAP00000026371\_Ppan/1-1078 VFKEVGYNVYAKKGE-RLFINEEKILWSGFSRE-----VPFSNCSRDCLAGTR 551  
ENSPTRP00000043342\_Ptro/1-1078 VFKEVGYNVYAKKGE-RLFINEEKILWSGFSRE-----VPFSNCSRDCLAGTR 551  
ENSCSAP00000003635\_Csabi/1-882 VFKEVGYNVYAKKGE-RLFINEEKILWSGFSRE-----VPFSNCSRDCLAGTR 355  
ENSMMPUP00000061002\_Mmul/1-1078 VFKEVGYNVYAKKGE-RLFINEEKILWSGFSRE-----VPFSNCSRDCLAGTR 551  
ENSPANP00000004316\_Panu/1-1081 VFKEVGYNVYAKKGE-RLFINEEKILWSGFSREPLTFVLSV-LQVVPFSNCSRDCLAGTR 561  
ENSCATP000000028615\_Caty/1-1078 VFKEVGYNVYAKKGE-RLFINEEKILWSGFSRE-----VPFSNCSRDCLAGTR 551  
ENSMFAP00000042132\_Mfas/1-1078 VFKEVGYNVYAKKGE-RLFINEEKILWSGFSRE-----VPFSNCSRDCLAGTR 551  
ENSMNEP00000024602\_Mnem/1-1078 VFKEVGYNVYAKKGE-RLFINEEKILWSGFSRE-----VPFSNCSRDCLAGTR 551  
ENSMLEP000000008744\_Mleu/1-1088 VFKEVGYNVYAKKGE-RLFINEEKILWSGFSREPLTFVLSV-LQVVPFSNCSRDCLAGTR 561  
ENSTGEP00000008766\_Tgel/1-1088 VFKEVGYNVYAKKGE-RLFINEEKILWSGFSREPLTFVLSV-LQVVPFSNCSRDCLAGTR 561  
ENSCANP00000040262\_Capa/1-1088 MFKEVGYNVYAKKGE-RLFINEEKILWSGFSREPLTFVLLV-LQVVPFSNCSRDCLAGTR 561  
ENSPTEP00000016080\_Ptep/1-1088 MFKEVGYNVYAKKGE-RLFINEEKILWSGFSREPLTFVLSI-LQVVPFSNCSRDCLAGTR 561  
ENSRBIP00000006831\_Rbie/1-1078 MFKEVGYNVYAKKGE-RLFINEEKILWSGFSRE-----VPFSNCSRDCLAGTR 551  
ENSRROP00000007818\_Rrox/1-1088 VFKEVGYNVYAKKGE-RLFINEEKILWSGFSREPLTFVLSI-LQVVPFSNCSRDCLAGTR 561  
ENSOGAP00000002850\_Ogar/1-1077 VFKEVGYNVYAKKGE-RLFINEEKILWSGFSRE-----VPFSNCSRDCLAGTR 551  
ENSMICP000000050654\_Mmur/1-1075 VFKEVGYNVYAKKGE-RLFINEEKILWSGFSRE-----VPFSNCSRDCLAGTR 551  
ENSPCOP00000009624\_Pcoq/1-1076 VFKEVGYNVYAKKGE-RLFINEEKILWSGFSRE-----VPFSNCSRDCLAGTR 551  
ENSPSPM00000007909\_Psim/1-1084 MFKEVGYNVYAKKGE-RLFINEEKILWSGFSREPLTFVFPV-LQVVPFSNCSRDCLAGTR 561

ENSMUEP00000013310\_Neug/1-956 KGI-IEGPTCCFECVCECPDGEYSDE--TDASADKCPDDFSWSENHTSCIAKQIEFLSW 554  
ENSTBEP00000002487\_Tbel/1-914 KGI-IEGPTCCFECVCECPDGEYSDE--TDASADKCPDDFSWSENHTSCIAKQIEFLSW 453  
ENSPCAP00000000755\_Pcap/1-1085 KGI-I---EGPCDFECVCECPDGEYSDE--TDASADKCPDDFSWSENHTSCIAKQIEFLSW 612  
ENSCPOP00000011907\_Chof/1-954 KGI-IEGPTCCFECVCECPDGEYSDE--TDASADKCPDDFSWSENHTSCIAKQIEFLSW 617  
ENSVVAP00000001982\_Vpac/1-1087 KGI-IEGPTCCFECVCECPDGEYSDE--TDASADKCPDDFSWSENHTSCIAKQIEFLSW 617  
ENSEEUP000000009670\_Eeur/1-946 KGI-IEGPTCCFECVCECPDGEYSDE--TDASADKCPDDFSWSENHTSCIAKQIEFLSW 482  
ENSOANP00000015961\_Oana/1-1083 KGI-IEGPTCCFECVCECPDGEYSDE--TDASADKCPDDFSWSENHTSCIAKQIEFLSW 608  
ENSOPRP000000000261\_Opri/1-1082 XXXXXXXXXXXXXXXXXXXXXXXXXXXXASADKCPDDFSWSENHTSCIAKQIEFLSW 618  
ENSJJAP000000004721\_Jjac/1-1084 -----TGGYPTST--TPIYADKCPDDFSWSENHTSCIAKQIEFLSW 584  
ENSPCIP00000034747\_Pcin/1-1018 KGI-IEGPTCCFECVCECPDGEYSDE--TDASADKCPDDFSWSENHTSCIAKQIEFLSW 556  
ENSMODP000000022810\_Mdom/1-1069 KGI-IEGPTCCFECVCECPDGEYSDE--TDASADKCPDDFSWSENHTSCIAKQIEFLSW 609  
ENSVURP00010007344\_Vurs/1-1070 KGI-IEGPTCCFECVCECPDGEYSDE--TDASADKCPDDFSWSENHTSCIAKQIEFLSW 609  
ENSSHAP00000014890\_Shar/1-1072 KGI-IEGPTCCFECVCECPDGEYSDE--TDASADKCPDDFSWSENHTSCIAKQIEFLSW 609  
ENSMAP000000005394\_Maur/1-954 -----CACFTCI-----YVCA--LNASADKCPDDFSWSENHTSCIAKQIEFLSW 557  
ENSOCUP000000025672\_Ocun/1-1063 KGI-IEGPTCCFECVCECPDGEYSDE--TDASADKCPDDFSWSENHTSCIAKQIEFLSW 608  
ENSPVAP00000011981\_Pvam/1-1085 KGI-IEGPTCCFECVCECPDGEYSDE--TDASADKCPDDFSWSENHTSCIAKQIEFLSW 618  
ENSETEP00000011160\_Etel/1-1024 KGI-IEGPTCCFECVCECPDGEYSDE--TDASADKCPDDFSWSENHTSCIAKQIEFLSW 554  
ENSFDA000000010532\_Fdam/1-1108 KGI-IEGPTCCFECVCECPDGEYSDE--TDASADKCPDDFSWSENHTSCIAKQIEFLSW 636  
ENSODEP00000013257\_Odeg/1-1070 KGI-IEGPTCCFECVCECPDGEYSDE--TDASADKCPDDFSWSENHTSCIAKQIEFLSW 608  
ENSHGLP00000002019\_Hgfe/1-1108 KGI-IEGPTCCFECVCECPDGEYSDE--TDASADKCPDDFSWSENHTSCIAKQIEFLSW 636  
ENSLAP000000021334\_Clan/1-1114 KGI-IEGPTCCFECVCECPDGEYSDE--TDASADKCPDDFSWSENHTSCIAKQIEFLSW 636  
ENSCAPP00000014352\_Cape/1-1068 KGI-IEGPTCCFECVCECPDGEYSDE--TDASADKCPDDFSWSENHTSCIAKQIEFLSW 608  
ENSCPOP00000011705\_Cpor/1-1071 KGI-IEGPTCCFECVCECPDGEYSDE--TDASADKCPDDFSWSENHTSCIAKQIEFLSW 608  
ENSSARP000000006151\_Sara/1-1085 KGI-IEGPTCCFECVCECPDGEYSDE--TDASADKCPDDFSWSENHTSCIAKQIEFLSW 615  
ENSLAFP00000018459\_Lafri/1-1090 KGI-IEGPTCCFECVCECPDGEYSDE--TDASADKCPDDFSWSENHTSCIAKQIEFLSW 619  
ENSDNOP00000011819\_Dnov/1-1075 KGI-IEGPTCCFECVCECPDGEYSDE--TDASADKCPDDFSWSENHTSCIAKQIEFLSW 608  
ENSSCP000000041077\_Sscr/1-1089 KGI-IEGPTCCFECVCECPDGEYSDE--TDASADKCPDDFSWSENHTSCIAKQIEFLSW 618  
ENSTTRP00000001326\_Ttru/1-1091 KGI-IEGPTCCFECVCECPDGEYSDE--TDASADKCPDDFSWSENHTSCIAKQIEFLSW 618  
ENSBPP000000002858\_Bbbi/1-1068 KGI-IEGPTCCFECVCECPDGEYSDE--TDASADKCPDDFSWSENHTSCIAKQIEFLSW 620  
ENSOARP000000021602\_Oari/1-1032 KGI-IEGPTCCFECVCECPDGEYSDE--TDASADKCPDDFSWSENHTSCIAKQIEFLSW 609

ENSCHIP00000033385\_Chir/1-1085 KGI-IEGEPTCCFECVCPDGEYSDE--TDASADKCPDDFWSNENHTSCIAKEIEFLSW 609  
ENSBTAP00000059078\_Btau/1-1085 KGI-IEGEPTCCFECVCPDGEYSDE--TDASADKCPDDFWSNENHTSCIAKEIEFLSW 609  
ENSBIXP00000038534\_Bthy/1-1085 KGI-IEGEPTCCFECVCPDGEYSDE--TDASADKCPDDFWSNENHTSCIAKEIEFLSW 609  
ENSBMUP00000019115\_Bmut/1-1081 KGI-IEGEPTCCFECVCPDGEYSDE--TDASADKCPDDFWSNENHTSCIAKEIEFLSW 609  
ENSBIXP0000005030570\_Bihy/1-1085 KGI-IEGEPTCCFECVCPDGEYSDE--TDASADKCPDDFWSNENHTSCIAKEIEFLSW 609  
ENSMUGP00000006365\_Mung/1-1080 KGI-IEGEPTCCFECVCPDGEYSDE--TDASADKCPDDFWSNENHTSCIAKEIEFLAW 608  
ENSRNOP00000006929\_Rnor/1-1079 KGI-IEGEPTCCFECVCPDGEYSDE--TDASADKCPDDFWSNENHTSCIAKEIEFLAW 608  
MGP\_PahariEiJ\_P0028852\_Mpah/1-1003 KGI-IEGEPTCCFECVCPDGEYSDE--TDASADKCPDDFWSNENHTSCIAKEIEFLAW 531  
MGP\_SPRETEiJ\_P0043347\_Mspr/1-1079 KGI-IEGEPTCCFECVCPDGEYSDE--TDASADKCPDDFWSNENHTSCIAKEIEFLAW 608  
ENSMUSP000000069080\_Mmus/1-1079 KGI-IEGEPTCCFECVCPDGEYSDE--TDASADKCPDDFWSNENHTSCIAKEIEFLAW 608  
ENSMOCP00000010340\_Moch/1-1076 KGI-IEGEPTCCFECVCPDGEYSDE--TDASADKCPDDFWSNENHTSCIAKEIEFLAW 608  
ENSPEMP00000029995\_Fmba/1-1076 KGI-IEGEPTCCFECVCPDGEYSDE--TDASADKCPDDFWSNENHTSCIAKEIEFLAW 608  
ENSCGRP000015024036\_Cgpi/1-1081 KGI-IEGEPTCCFECVCPDGEYSDE--TDASADKCPDDFWSNENHTSCIAKEIEFLAW 608  
ENSCGRP000001016053\_Cgch/1-1081 KGI-IEGEPTCCFECVCPDGEYSDE--TDASADKCPDDFWSNENHTSCIAKEIEFLAW 608  
ENSCGRP00000017369\_Cgcr/1-1081 KGI-IEGEPTCCFECVCPDGEYSDE--TDASADKCPDDFWSNENHTSCIAKEIEFLAW 608  
ENSDORP00000002959\_Dord/1-1078 KGI-IEGEPTCCFECVCPDGEYSDE--TDASADKCPDDFWSNENHTSCIAKEIEFLSW 608  
ENSTSP00000002643\_Csyr/1-1015 KGI-IEGEPTCCFECVCPDGEYSDE--TDASADKCPDDFWSNENHTSCIAKEIEFLAW 618  
ENSMMLUP00000008249\_Mluc/1-1075 KGI-IEGKPTCCFECVCPDGEYSDE--TDASADKCPDDFWSNENHTSCIAKEIEFLSW 607  
ENSECAP000000022285\_Ecab/1-1084 KGI-IEGEPTCCFECVCPDGEYSDE--TDASADKCPDDFWSNENHTSCIAKEIEFLSW 608  
ENSEASP00000052276\_Eaas/1-1094 KGI-IEGEPTCCFECVCPDGEYSDE--TDASADKCPDDFWSNENHTSCIAKEIEFLSW 618  
ENSCAFP00000017381\_Cfam/1-1075 KGI-IEGEPTCCFECVCPDGEYSDE--TDASADKCPDDFWSNENHTSCIAKEIEFLSW 608  
ENSCAFP000020007154\_Cldi/1-1075 KGI-IEGEPTCCFECVCPDGEYSDE--TDASADKCPDDFWSNENHTSCIAKEIEFLSW 608  
ENSVVUP000000030826\_Vvul/1-1075 KGI-IEGEPTCCFECVCPDGEYSDE--TDASADKCPDDFWSNENHTSCIAKEIEFLSW 608  
ENSFCAP00000008080\_Fcat/1-1081 KGI-IEGEPTCCFECVCPDGEYSDE--TDASADKCPDDFWSNENHTSCIAKEIEFLSW 608  
ENSPPRP00000023800\_Ppar/1-1081 KGI-IEGEPTCCFECVCPDGEYSDE--TDASADKCPDDFWSNENHTSCIAKEIEFLSW 608  
ENSPTIP00000015042\_Ptal/1-1081 KGI-IEGEPTCCFECVCPDGEYSDE--TDASADKCPDDFWSNENHTSCIAKEIEFLSW 608  
ENSMUPP00000004759\_Mpfu/1-1082 KGI-IEGEPTCCFECVCPDGEYSDE--TDASADKCPDDFWSNENHTSCIAKEIEFLSW 608  
ENSNVIP00000018564\_Nvis/1-1092 KGI-IEGEPTCCFECVCPDGEYSDE--TDASADKCPDDFWSNENHTSCIAKEIEFLSW 618  
ENSUMAP000000035085\_Umar/1-1071 KGI-IEGEPTCCFECVCPDGEYSDE--TDASADKCPDDFWSNENHTSCIAKEIEFLSW 618  
ENSUAMP000000035930\_Uame/1-1079 KGI-IEGEPTCCFECVCPDGEYSDE--TDASADKCPDDFWSNENHTSCIAKEIEFLSW 608  
ENSAMEP00000015060\_Amel/1-1089 KGI-IEGEPTCCFECVCPDGEYSDE--TDASADKCPDDFWSNENHTSCIAKEIEFLSW 618  
ENSSDAP00000007437\_Sdau/1-1079 KGI-IEGEPTCCFECVCPDGEYSDE--TDASADKCPDDFWSNENHTSCIAKEIEFLSW 608  
ENSSTOP00000003945\_Itri/1-1070 KGI-IEGEPTCCFECVCPDGEYSDE--TDASADKCPDDFWSNENHTSCIAKEIEFLSW 608  
ENSMMP00000015298\_Mmma/1-1083 KGI-IEGEPTCCFECVCPDGEYSDE--TDASADKCPDDFWSNENHTSCIAKEIEFLSW 608  
ENSUPAP000010025947\_Upar/1-1086 KGI-IEGEPTCCFECVCPDGEYSDE--TDASADKCPDDFWSNENHTSCIAKEIEFLSW 608  
ENSSBOP00000036416\_Sbbo/1-1078 KGI-IEGEPTCCFECVCPDGEYSDE--TDASADKCPDDFWSNENHTSCIAKEIEFLSW 608  
ENSANAP00000028404\_Anan/1-1078 KGI-IEGEPTCCFECVCPDGEYSDE--TDASADKCPDDFWSNENHTSCIAKEIEFLSW 608  
ENSCCAP00000024327\_Ccap/1-1077 KGI-IEGEPTCCFECVCPDGEYSDE--TDASADKCPDDFWSNENHTSCIAKEIEFLSW 608  
ENSCJAP00000062854\_Cjac/1-1089 KGI-IEGEPTCCFECVCPDGEYSDE--TDASADKCPDDFWSNENHTSCIAKEIEFLSW 618  
ENSNLEP00000000336\_Nleu/1-1088 KGI-IEGEPTCCFECVCPDGEYSDE--TDASADKCPDDFWSNENHTSCIAKEIEFLSW 618  
ENSPYP00000015087\_Pabe/1-1078 KGI-IEGEPTCCFECVCPDGEYSDE--TDASADKCPDDFWSNENHTSCIAKEIEFLSW 608  
ENSP00000420194\_Hsap/1-1088 KGI-IEGEPTCCFECVCPDGEYSDE--TDASADKCPDDFWSNENHTSCIAKEIEFLSW 618  
ENSGGOP00000020287\_Ggor/1-1078 KGI-IEGEPTCCFECVCPDGEYSDE--TDASADKCPDDFWSNENHTSCIAKEIEFLSW 608  
ENSPAP000000026371\_Ppan/1-1078 KGI-IEGEPTCCFECVCPDGEYSDE--TDASADKCPDDFWSNENHTSCIAKEIEFLSW 608  
ENSPTRP00000043342\_Ptro/1-1078 KGI-IEGEPTCCFECVCPDGEYSDE--TDASADKCPDDFWSNENHTSCIAKEIEFLSW 608  
ENSCSAP00000003635\_Csab/1-882 KGI-IEGEPTCCFECVCPDGEYSDE--TDASADKCPDDFWSNENHTSCIAKEIEFLSW 412  
ENSMUP000000061002\_Mmul/1-1078 KGI-IEGEPTCCFECVCPDGEYSDE--TDASADKCPDDFWSNENHTSCIAKEIEFLSW 608  
ENSPANP00000004316\_Panu/1-1081 KGI-IEGEPTCCFECVCPDGEYSDE--TDASADKCPDDFWSNENHTSCIAKEIEFLSW 611  
ENSCATP000000028615\_Caty/1-1078 KGI-IEGEPTCCFECVCPDGEYSDE--TDASADKCPDDFWSNENHTSCIAKEIEFLSW 608  
ENSMFAP000000042132\_Mfas/1-1078 KGI-IEGEPTCCFECVCPDGEYSDE--TDASADKCPDDFWSNENHTSCIAKEIEFLSW 608  
ENSMNEP00000024602\_Mnen/1-1078 KGI-IEGEPTCCFECVCPDGEYSDE--TDASADKCPDDFWSNENHTSCIAKEIEFLSW 608  
ENSMLEP000000008744\_Mleu/1-1088 KGI-IEGEPTCCFECVCPDGEYSDE--TDASADKCPDDFWSNENHTSCIAKEIEFLSW 618  
ENSTGEP00000008766\_Tgel/1-1088 KGI-IEGEPTCCFECVCPDGEYSDE--TDASADKCPDDFWSNENHTSCIAKEIEFLSW 618  
ENSCANP000000040262\_Capa/1-1088 KGI-IEGEPTCCFECVCPDGEYSDE--TDASADKCPDDFWSNENHTSCIAKEIEFLSW 618  
ENSPTEP00000016080\_Ptep/1-1088 KGI-IEGEPTCCFECVCPDGEYSDE--TDASADKCPDDFWSNENHTSCIAKEIEFLSW 618  
ENSRBIP00000006831\_Rbie/1-1078 KGI-IEGEPTCCFECVCPDGEYSDE--TDASADKCPDDFWSNENHTSCIAKEIEFLSW 608  
ENSRROP00000007818\_Rrox/1-1088 KGI-IEGEPTCCFECVCPDGEYSDE--TDASADKCPDDFWSNENHTSCIAKEIEFLSW 618  
ENSOGAP00000002850\_Ogar/1-1077 KGI-IEGEPTCCFECVCPDGEYSDE--TDASADKCPDDFWSNENHTSCIAKEIEFLSW 608  
ENSMICP00000005654\_Mmur/1-1075 KGI-IEGEPTCCFECVCPDGEYSDE--TDASADKCPDDFWSNENHTSCIAKEIEFLSW 608  
ENSPCOP00000009624\_Pcoq/1-1076 KGI-IEGEPTCCFECVCPDGEYSDE--TDASADKCPDDFWSNENHTSCIAKEIEFLSW 608  
ENSPMP00000007909\_Psim/1-1084 KGI-IEGEPTCCFECVCPDGEYSDE--TDASADKCPDDFWSNENHTSCIAKEIEFLSW 618

\*\* \*\*\*\*\* \*\* . \*\*\*\*\*:\*\*:\*\*\*\*\* \*

ENSMEMP00000013310\_Neug/1-956 TEPFGIALTFLFVAVLGFILTSFVLGVFIKFRNTPIVKATNRELSYLLFLSLCCFSSSLFF 614  
ENSTBEP00000002487\_Tbel/1-914 TEPFGIALTFLFVAVLGFILTAFLVGVFIKFRNTPIVKATNRELSYLLFLSLCCFSSSLFF 513  
ENSPCAP00000000755\_Pcap/1-1085 TEPFGIALTFLFVAVLGIILTAFLVGVFIKFRNTPIVKATNRELSYLLFLSLCCFSSSLFF 672  
ENSCHOP00000011907\_Chof/1-954 TEPFGIALTFLFVAVLGFILTAFLVGVFIKFRNTPIVKATNRELSYLLFLSLCCFSSSLFF 677  
ENSVAP00000001982\_Vpac/1-1087 TEPFGIALTFLFVAVLGFILTAFLVGVFIKFRNTPIVKATNRELSYLLFLSLCCFSSSLFF 677  
ENSEEUP000000009670\_Eeur/1-946 TEPFGIALTFLFVAVLGFILTTFVLGVFIKFRNTPIVKATNRELSYLLFLSLCCFSSSLFF 542  
ENSOANP00000015961\_Oana/1-1083 TEPFGIALTFLFVAVLGFILTSFVLGVFIKFRNTPIVKATNRELSYLLFLSLCCFSSSLFF 668  
ENSOPRP00000000261\_Opri/1-1082 TEPFGIALTFLFVAVLGFILTAFLVGVFIKFRNTPIVKATNRELSYLLFLSLCCFSSSLFF 678  
ENSJJAP000000004721\_Jjac/1-1084 TEPFGIALTFLFVAVLGIILTAFLVGVFIKFRNTPMVKATNRELSYLLFLSLCCFSSSLFF 644  
ENSPCIP000000034747\_Pcin/1-1018 TEPFGIALTFLFVAVLGFILTSFVLGVFIKFRNTPIVKATNRELSYLLFLSLCCFSSSLFF 616  
ENSMODP000000022810\_Mdom/1-1069 TEPFGIALTFLFVAVLGFILTSFVLGVFIKFRNTPIVKATNRELSYLLFLSLCCFSSSLFF 669  
ENSVURP000010007344\_Vurs/1-1070 TEPFGIALTFLFVAVLGFILTSFVLGVFIKFRNTPIVKATNRELSYLLFLSLCCFSSSLFF 669  
ENSHAP000000014890\_Shar/1-1072 TEPFGIALTFLFVAVLGFILTSFVLGVFIKFRNTPIVKATNRELSYLLFLSLCCFSSSLFF 669  
ENSMaup00000005394\_Maur/1-954 TEPFGIALTFLFVAVLGFILTAFLVGVFIKFRNTPIVKATNRELSYLLFLSLCCFSSSLFF 617  
ENSOCUP000000025672\_Ocun/1-1063 TEPFGIALTLLAVLGFILTAFLVGVFIKFRNTPIVKATNRELSYLLFLSLCCFSSSLFF 668  
ENSPVAP000000011981\_Pvam/1-1085 TEPFGIALTFLFVAVLGFILTSFVLGVFIKFRNTPIVKATNRELSYLLFLSLCCFSSSLFF 678  
ENSETEP00000011160\_Etel/1-1024 TEPFGIALTFLFVAVLGFILTAFLVGVFIKFRNTPIVKATNRELSYLLFLSLCCFSSSLFF 614  
ENSFADP00000010532\_Fdam/1-1108 TEPFGIALTLLAVLGFILTAFLVGVFIKFRNTPIVKATNRELSYLLFLSLCCFSSSLFF 696  
ENSOEP000000013257\_Odeg/1-1070 TEPFGIALTFLFVAVLGFILTSFVLGVFIKFRNTPIVKATNRELSYLLFLSLCCFSSSLFF 668  
ENSHGLP00000002019\_Hgfe/1-1108 TEPFGIALTFLFVAVLGFILTAFLVGVFIKFRNTPIVKATNRELSYLLFLSLCCFSSSLFF 696  
ENSLAP000000021334\_Clan/1-1114 TEPFGIALTFLFVAVLGFILTTFVLGVFIKFRNTPIVKATNRELSYLLFLSLCCFSSSLFF 696  
ENSCAPP000000014352\_Cape/1-1068 TEPFGIALTFLFVAVLGFILTAFLVGVFIKFRNTPIVKATNRELSYLLFLSLCCFSSSLFF 668  
ENSCPOP00000011705\_Cpor/1-1071 TEPFGIALTFLFVAVLGFILTAFLVGVFIKFRNTPIVKATNRELSYLLFLSLCCFSSSLFF 668  
ENSSARP00000006151\_Sara/1-1085 TEPFGIALTFLFVAVLGFILTAFLVGVFIKFRNTPIVKATNRELSYLLFLSLCCFSSSLFF 675  
ENSLAFP000000018459\_Lafra/1-1090 TEPFGIALTFLFVAVLGFILTAFLVGVFIKFRNTPIVKATNRELSYLLFLSLCCFSSSLFF 679

|                                              |                                                              |     |
|----------------------------------------------|--------------------------------------------------------------|-----|
| ENSDNOP00000011819_Dnov/1-1075               | TEPFGIALTTLFAVLGILLTAFVLGVFIKFRNTPIVKATNRELSYLLLSLCCFSSSLFF  | 668 |
| ENSSSCP00000041077_Sscr/1-1089               | TEPFGIALTTLFAVLGIFLTAFLVLGVFIKFRNTPIVKATNRELSYLLLSLCCFSSSLFF | 678 |
| ENSTTRP00000001326_Ttru/1-1091               | TEPFGIALTTLFAVLGIFLTAFLVLGVFIKFRNTPIVKATNRELSYLLLSLCCFSSSLFF | 678 |
| ENSBP000000002858_Bbb1/1-1068                | TEPFGIALTTLFAVLGIFLTAFLVLGVFIKFRNTPIVKATNRELSYLLLSLCCFSSSLFF | 680 |
| ENSOARP000000021602_Oari/1-1032              | TEPFGIALTTLFAVLGIFLTAFLVLGVFIKFRNTPIVKATNRELSYLLLSLCCFSSSLFF | 669 |
| ENSCHIP00000033385_Chir/1-1085               | TEPFGIALTTLFAVLGIFLTAFLVLGVFIKFRNTPIVKATNRELSYLLLSLCCFSSSLFF | 669 |
| ENSBTAP00000059078_Btau/1-1085               | TEPFGIALTTLFAVLGIFLTAFLVLGVFIKFRNTPIVKATNRELSYLLLSLCCFSSSLFF | 669 |
| ENSBIXP000000038534_Bthy/1-1085              | TEPFGIALTTLFAVLGIFLTAFLVLGVFIKFRNTPIVKATNRELSYLLLSLCCFSSSLFF | 669 |
| ENSBMUP00000019115_Bmut/1-1081               | TEPFGIALTTLFAVLGIFLTAFLVLGVFIKFRNTPIVKATNRELSYLLLSLCCFSSSLFF | 669 |
| ENSBIXP0000005030570_Bihy/1-1085             | TEPFGIALTTLFAVLGIFLTAFLVLGVFIKFRNTPIVKATNRELSYLLLSLCCFSSSLFF | 669 |
| ENSMUGP000000006365_Mung/1-1080              | TEPFGIALTTLFAVLGIFLTAFLVLGVFIKFRNTPIVKATNRELSYLLLSLCCFSSSLFF | 668 |
| ENSRNOP00000069629_Rnor/1-1079               | TEPFGIALTTLFAVLGIFLTAFLVLGVFIKFRNTPIVKATNRELSYLLLSLCCFSSSLFF | 668 |
| MGP_PahariEij_P0028852_Mpah/1-1003           | TEPFGIALTTLFAVLGIFLTAFLVLGVFIKFRNTPIVKATNRELSYLLLSLCCFSSSLFF | 591 |
| MGP_SPRETEiJ_P0043347_Mspr/1-1079            | TEPFGIALTTLFAVLGIFLTAFLVLGVFIKFRNTPIVKATNRELSYLLLSLCCFSSSLFF | 668 |
| ENSMUSP00000069080_Mmus/1-1079               | TEPFGIALTTLFAVLGIFLTAFLVLGVFIKFRNTPIVKATNRELSYLLLSLCCFSSSLFF | 668 |
| ENSMOCP00000010340_Moch/1-1076               | TEPFGIALTTLFAVLGIFLTAFLVLGVFIKFRNTPIVKATNRELSYLLLSLCCFSSSLFF | 668 |
| ENSPEMP000000029995_Pmba/1-1076              | TEPFGIALTTLFAVLGIFLTAFLVLGVFIKFRNTPIVKATNRELSYLLLSLCCFSSSLFF | 668 |
| ENSCGRP00015024036_Cgpi/1-1081               | TEPFGIALTTLFAVLGIFLTAFLVLGVFIKFRNTPIVKATNRELSYLLLSLCCFSSSLFF | 668 |
| ENSCGRP00001016053_Cgch/1-1081               | TEPFGIALTTLFAVLGIFLTAFLVLGVFIKFRNTPIVKATNRELSYLLLSLCCFSSSLFF | 668 |
| ENSCGRP000000017369_Cgcr/1-1081              | TEPFGIALTTLFAVLGIFLTAFLVLGVFIKFRNTPIVKATNRELSYLLLSLCCFSSSLFF | 668 |
| ENSDORP00000002959_Dord/1-1078               | TEPFGIALTTLFAVLGIFLTAFLVLGVFIKFRNTPIVKATNRELSYLLLSLCCFSSSLFF | 668 |
| ENSTSY000000002643_Csyr/1-1015               | TEPFGIALTTLFAVLGIFLTAFLVLGVFIKFRNTPIVKATNRELSYLLLSLCCFSSSLFF | 678 |
| ENSMUP0000000008249_Mluc/1-1075              | TEPFGIALTTLFAVLGIFLTAFLVLGVFIKFRNTPIVKATNRELSYLLLSLCCFSSSLFF | 667 |
| ENSECAP000000022285_Ecab/1-1084              | TEPFGIALTTLFAVLGIFLTAFLVLGVFIKFRNTPIVKATNRELSYLLLSLCCFSSSLFF | 668 |
| ENSEASP000005022676_Eaas/1-1094              | TEPFGIALTTLFAVLGIFLTAFLVLGVFIKFRNTPIVKATNRELSYLLLSLCCFSSSLFF | 678 |
| ENSCAFP000000017393_Cfam/1-1075              | TEPFGIALTTLFAVLGIFLTAFLVLGVFIKFRNTPIVKATNRELSYLLLSLCCFSSSLFF | 668 |
| ENSCAFP000020007154_Cldi/1-1075              | TEPFGIALTTLFAVLGIFLTAFLVLGVFIKFRNTPIVKATNRELSYLLLSLCCFSSSLFF | 668 |
| ENSVVUP00000030826_Vvul/1-1075               | TEPFGIALTTLFAVLGIFLTAFLVLGVFIKFRNTPIVKATNRELSYLLLSLCCFSSSLFF | 668 |
| ENSFCA000000008080_Fcat/1-1081               | TEPFGIALTTLFAVLGIFLTAFLVLGVFIKFRNTPIVKATNRELSYLLLSLCCFSSSLFF | 668 |
| ENSPRRP000000023800_Ppar/1-1081              | TEPFGIALTTLFAVLGIFLTAFLVLGVFIKFRNTPIVKATNRELSYLLLSLCCFSSSLFF | 668 |
| ENSPPIP000000015042_Ptal/1-1081              | TEPFGIALTTLFAVLGIFLTAFLVLGVFIKFRNTPIVKATNRELSYLLLSLCCFSSSLFF | 668 |
| ENSMUP000000004759_Mpfi/1-1082               | TEPFGIALTTLFAVLGIFLTAFLVLGVFIKFRNTPIVKATNRELSYLLLSLCCFSSSLFF | 668 |
| ENSNVIP00000018564_Nvis/1-1092               | TEPFGIALTTLFAVLGIFLTAFLVLGVFIKFRNTPIVKATNRELSYLLLSLCCFSSSLFF | 678 |
| ENSUMAP00000035085_Umar/1-1071               | TEPFGIALTTLFAVLGIFLTAFLVLGVFIKFRNTPIVKATNRELSYLLLSLCCFSSSLFF | 668 |
| ENSUAMP0000000035930_Uame/1-1079             | TEPFGIALTTLFAVLGIFLTAFLVLGVFIKFRNTPIVKATNRELSYLLLSLCCFSSSLFF | 668 |
| ENSAMEP00000015060_Amel/1-1089               | TEPFGIALTTLFAVLGIFLTAFLVLGVFIKFRNTPIVKATNRELSYLLLSLCCFSSSLFF | 678 |
| ENSSDAP00000007437_Sdau/1-1079               | TEPFGIALTTLFAVLGIFLTAFLVLGVFIKFRNTPIVKATNRELSYLLLSLCCFSSSLFF | 668 |
| ENSTOP0000000003945_Itri/1-1070              | TEPFGIALTTLFAVLGIFLTAFLVLGVFIKFRNTPIVKATNRELSYLLLSLCCFSSSLFF | 668 |
| ENSMMP00000015298_Mmma/1-1083                | TEPFGIALTTLFAVLGIFLTAFLVLGVFIKFRNTPIVKATNRELSYLLLSLCCFSSSLFF | 668 |
| ENSUPAP00010025947_Upar/1-1086               | TEPFGIALTTLFAVLGIFLTAFLVLGVFIKFRNTPIVKATNRELSYLLLSLCCFSSSLFF | 668 |
| ENSBOP000000036416_Sbbo/1-1078               | TEPFGIALTTLFAVLGIFLTAFLVLGVFIKFRNTPIVKATNRELSYLLLSLCCFSSSLFF | 668 |
| ENSANAP000000028404_Anan/1-1078              | TEPFGIALTTLFAVLGIFLTAFLVLGVFIKFRNTPIVKATNRELSYLLLSLCCFSSSLFF | 668 |
| ENSCCAP000000024327_Ccap/1-1077              | TEPFGIALTTLFAVLGIFLTAFLVLGVFIKFRNTPIVKATNRELSYLLLSLCCFSSSLFF | 668 |
| ENSCJAP000000062854_Cjac/1-1089              | TEPFGIALTTLFAVLGIFLTAFLVLGVFIKFRNTPIVKATNRELSYLLLSLCCFSSSLFF | 678 |
| ENSNLEP000000003336_Nleu/1-1088              | TEPFGIALTTLFAVLGIFLTAFLVLGVFIKFRNTPIVKATNRELSYLLLSLCCFSSSLFF | 678 |
| ENSPYP000000015087_Pabe/1-1078               | TEPFGIALTTLFAVLGIFLTAFLVLGVFIKFRNTPIVKATNRELSYLLLSLCCFSSSLFF | 668 |
| ENSP00000420194_Hsap/1-1088                  | TEPFGIALTTLFAVLGIFLTAFLVLGVFIKFRNTPIVKATNRELSYLLLSLCCFSSSLFF | 678 |
| ENSGG0P0000000202677_Ggor/1-1078             | TEPFGIALTTLFAVLGIFLTAFLVLGVFIKFRNTPIVKATNRELSYLLLSLCCFSSSLFF | 668 |
| ENSPAP000000026371_Ppan/1-1078               | TEPFGIALTTLFAVLGIFLTAFLVLGVFIKFRNTPIVKATNRELSYLLLSLCCFSSSLFF | 668 |
| ENSPTRP000000043342_Ptro/1-1078              | TEPFGIALTTLFAVLGIFLTAFLVLGVFIKFRNTPIVKATNRELSYLLLSLCCFSSSLFF | 668 |
| ENSCSAP000000003635_Csab/1-882               | TEPFGIALTTLFAVLGIFLTAFLVLGVFIKFRNTPIVKATNRELSYLLLSLCCFSSSLFF | 472 |
| ENSMUP000000061002_Mmul/1-1078               | TEPFGIALTTLFAVLGIFLTAFLVLGVFIKFRNTPIVKATNRELSYLLLSLCCFSSSLFF | 668 |
| ENSPANP00000004316_Panu/1-1081               | TEPFGIALTTLFAVLGIFLTAFLVLGVFIKFRNTPIVKATNRELSYLLLSLCCFSSSLFF | 671 |
| ENSCATP000000028615_Caty/1-1078              | TEPFGIALTTLFAVLGIFLTAFLVLGVFIKFRNTPIVKATNRELSYLLLSLCCFSSSLFF | 668 |
| ENSMFAP0000000421332_Mfas/1-1078             | TEPFGIALTTLFAVLGIFLTAFLVLGVFIKFRNTPIVKATNRELSYLLLSLCCFSSSLFF | 668 |
| ENSMNEP000000024602_Mnem/1-1078              | TEPFGIALTTLFAVLGIFLTAFLVLGVFIKFRNTPIVKATNRELSYLLLSLCCFSSSLFF | 668 |
| ENSMLEP000000008744_Mleu/1-1088              | TEPFGIALTTLFAVLGIFLTAFLVLGVFIKFRNTPIVKATNRELSYLLLSLCCFSSSLFF | 678 |
| ENSTGEP000000008766_Tgel/1-1088              | TEPFGIALTTLFAVLGIFLTAFLVLGVFIKFRNTPIVKATNRELSYLLLSLCCFSSSLFF | 678 |
| ENSCANP000000040262_Capa/1-1088              | TEPFGIALTTLFAVLGIFLTAFLVLGVFIKFRNTPIVKATNRELSYLLLSLCCFSSSLFF | 678 |
| ENSPTEP000000016080_Ptep/1-1088              | TEPFGIALTTLFAVLGIFLTAFLVLGVFIKFRNTPIVKATNRELSYLLLSLCCFSSSLFF | 678 |
| ENSRBIP000000006831_Rbie/1-1078              | TEPFGIALTTLFAVLGIFLTAFLVLGVFIKFRNTPIVKATNRELSYLLLSLCCFSSSLFF | 668 |
| ENSRROP000000007818_Rrox/1-1088              | TEPFGIALTTLFAVLGIFLTAFLVLGVFIKFRNTPIVKATNRELSYLLLSLCCFSSSLFF | 678 |
| ENSOGAP000000002850_Ogar/1-1077              | TEPFGIALTTLFAVLGIFLTAFLVLGVFIKFRNTPIVKATNRELSYLLLSLCCFSSSLFF | 668 |
| ENSMICP000000050654_Mmur/1-1075              | TEPFGIALTTLFAVLGILLTAFVLGVFIKFRNTPIVKATNRELSYLLLSLCCFSSSLFF  | 668 |
| ENSPCOP00000009624_Pcoq/1-1076               | TEPFGIALTTLFAVLGILLTAFVLGVFIKFRNTPIVKATNRELSYLLLSLCCFSSSLFF  | 668 |
| ENSPSPM00000007909_Psim/1-1084               | TEPFGIALTTLFAVLGILLTAFVLGVFIKFRNTPIVKATNRELSYLLLSLCCFSSSLFF  | 678 |
| *****:**** * :*.**: * ***:*****:****:*****:* |                                                              |     |
| ENSMUP00000013310_Neug/1-956                 | IGEPQDWTCLRLQPAFGISFVLCISILVKTNRILLVFEAKIPTSHRKKWGLNLQFLV    | 674 |
| ENSTBEP00000002487_Tbel/1-914                | IGEPQDWTCLRLQPAFGISFVLCISILVKTNRILLVFEAKIPTSHRKKWGLNLQFLV    | 573 |
| ENSPCAP00000000755_Pcap/1-1085               | IGEPQDWTCLRLQPAFGISFVLCISILVKTNRILLVFEAKIPTSHRKKWGLNLQFLV    | 732 |
| ENSCHOP00000011907_Chof/1-954                | IGEPQDWTCLRLQPAFGISFVLCISILVKTNRILLVFEAKIPTSHRKKWGLNLQFLV    | 737 |
| ENSVAP000000001982_Vpac/1-1087               | IGEPQDWTCLRLQPAFGISFVLCISILVKTNRILLVFEAKIPTSHRKKWGLNLQFLV    | 737 |
| ENSEEUP00000009670_Eeur/1-946                | IGEPQDWTCLRLQPAFGISFVLCISILVKTNRILLVFEAKIPTSHRKKWGLNLQFLV    | 602 |
| ENSOANP00000015961_Oana/1-1083               | IGEPDWTCLRLQPAFGTSFVLCVSCILVKTNRVLLAFEAKIPTGLHRKKWGLNLQFLV   | 728 |
| ENSOPRP0000000002611_Opri/1-1082             | IGEPQDWTCLRLQPAFGISFVLCISILVKTNRILLVFEAKIPTSHRKKWGLNLQFLV    | 738 |
| ENSJJAP00000004721_Jjac/1-1084               | IGEPQDWTCLRLQPAFGISFVLCISILVKTNRILLVFEAKIPTSHRKKWGLNLQFLV    | 704 |
| ENSPCIP000000034747_Pcin/1-1018              | IGEPQDWTCLRLQPAFGISFVLCISILVKTNRILLVFEAKIPTSHRKKWGLNLQFLV    | 676 |
| ENSMODP000000022810_Mdom/1-1069              | IGEPQDWTCLRLQPAFGISFVLCISILVKTNRILLVFEAKIPTSHRKKWGLNLQFLV    | 729 |
| ENSVURP00010007344_Vurs/1-1070               | IGEPQDWTCLRLQPAFGISFVLCISILVKTNRILLVFEAKIPTSHRKKWGLNLQFLV    | 729 |
| ENSSHAP00000014890_Shar/1-1072               | IGEPQDWTCLRLQPAFGISFVLCISILVKTNRILLVFEAKIPTSHRKKWGLNLQFLV    | 729 |
| ENSMAP000000005394_Maur/1-954                | IGEPQDWTCLRLQPAFGISFVLCISILVKTNRILLVFEAKIPTSHRKKWGLNLQFLV    | 677 |
| ENSOCUP000000025672_Ocun/1-1063              | IGEPQDWTCLRLQPAFGISFVLCISILVKTNRILLVFEAKIPTSHRKKWGLNLQFLV    | 728 |
| ENSPVAP00000011981_Pvam/1-1085               | IGEP-DWTCLRLQPAFGISFVLCISILVKTNRILLVFEAKIPTSHRKKWGLNLQFLV    | 737 |
| ENSETEP00000011160_Etel/1-1024               | IGEPDWTCLRLQPAFGISFVLCISILVKTNRILLVFEAKIPTSHRKKWGLNLQFLV     | 674 |
| ENSFADAP00000010532_Fdam/1-1108              | IGEPQDWTCLRLQPAFGISFVLCISILVKTNRILLVFEAKIPTSHRKKWGLNLQFLV    | 756 |
| ENSDOP00000013257_Odeg/1-1070                | IGEPQDWTCLRLQPAFGISFVLCISILVKTNRILLVFEAKIPTSHRKKWGLNLQFLV    | 728 |
| ENSHGLP000000002019_Hgfe/1-1108              | IGEPQDWTCLRLQPAFGISFVLCISILVKTNRILLVFEAKIPTSHRKKWGLNLQFLV    | 756 |



ENSC LAP00000021334\_Clan/1-1114 IGEPQDWTCLRLQPAFGISFVLCISILVKTNRVLLVFEAKIPTS FHRKWWGLNLQFLLV 756  
ENSCAPP00000014352\_Cape/1-1068 IGEPQDWTCLRLQPAFGISFVLCISILVKTNRVLLVFEAKIPTS FHRKWWGLNLQFLLV 728  
ENSCPOP00000011705\_Cpor/1-1071 IGEPQDWTCLRLQPAFGISFVLCISILVKTNRVLLVFEAKIPTS FHRKWWGLNLQFLLV 728  
ENSSARP00000006151\_Sara/1-1085 IGEPQDWTCLRLQPAFGISFVLCISILVKTNRVLLVFEAKIPTS FHRKWWGLNLQFLLV 735  
ENSLAFP00000018459\_Lafr/1-1090 IGEPQDWTCLRLQPAFGISFVLCISILVKTNRVLLVFEAKIPTS FHRKWWGLNLQFLLV 739  
ENSDNOP00000011819\_Dnov/1-1075 IGEPQDWTCLRLQPAFGISFVLCISILVKTNRVLLVFEAKIPTS FHRKWWGLNLQFLLV 728  
ENSSSCP000000041077\_Sscr/1-1089 IGEPQDWTCLRLQPAFGISFVLCISILVKTNRVLLVFEAKIPTS FHRKWWGLNLQFLLV 738  
ENSTTRP00000001326\_Ttru/1-1091 IGEPQDWTCLRLQPAFGISFVLCISILVKTNRVLLVFEAKIPTS FHRKWWGLNLQFLLV 738  
ENSB BPP00000002858\_Bbbi/1-1068 IGEPQDWTCLRLQPAFGISFVLCISILVKTNRVLLVFEAKIPTS FHRKWWGLNLQFLLV 740  
ENSOARP000000021602\_Oari/1-1032 IGEPQDWTCLRLQPAFGISFVLCISILVKTNRVLLVFEAKIPTS FHRKWWGLNLQFLLV 729  
ENSCHIP00000003385\_Chir/1-1085 IGEPQDWTCLRLQPAFGISFVLCISILVKTNRVLLVFEAKIPTS FHRKWWGLNLQFLLV 729  
ENSBTAP000000059078\_Btau/1-1085 IGEPQDWTCLRLQPAFGISFVLCISILVKTNRVLLVFEAKIPTS FHRKWWGLNLQFLLV 729  
ENSBIXP000000038534\_Bthy/1-1085 IGEPQDWTCLRLQPAFGISFVLCISILVKTNRVLLVFEAKIPTS FHRKWWGLNLQFLLV 729  
ENSBMUP000000019115\_Bmut/1-1081 IGEPQDWTCLRLQPAFGISFVLCISILVKTNRVLLVFEAKIPTS FHRKWWGLNLQFLLV 729  
ENSBIXP00000005030570\_Bihy/1-1085 IGEPQDWTCLRLQPAFGISFVLCISILVKTNRVLLVFEAKIPTS FHRKWWGLNLQFLLV 729  
ENSMUGP000000006365\_Mung/1-1080 IGEPQDWTCLRLQPAFGISFVLCISILVKTNRVLLVFEAKIPTS FHRKWWGLNLQFLLV 728  
ENSRNOP000000069629\_Rnor/1-1079 IGEPQDWTCLRLQPAFGISFVLCISILVKTNRVLLVFEAKIPTS FHRKWWGLNLQFLLV 728  
MGP\_PahariEiJ\_P0028852\_Mpah/1-1003 IGEPQDWTCLRLQPAFGISFVLCISILVKTNRVLLVFEAKIPTS FHRKWWGLNLQFLLV 651  
MGP\_SPRETEiJ\_P0043347\_Mspr/1-1079 IGEPQDWTCLRLQPAFGISFVLCISILVKTNRVLLVFEAKIPTS FHRKWWGLNLQFLLV 728  
ENSMUSP000000069080\_Mmus/1-1079 IGEPQDWTCLRLQPAFGISFVLCISILVKTNRVLLVFEAKIPTS FHRKWWGLNLQFLLV 728  
ENSMOCP000000010340\_Moch/1-1076 IGEPQDWTCLRLQPAFGISFVLCISILVKTNRVLLVFEAKIPTS FHRKWWGLNLQFLLV 728  
ENSPMP000000029955\_Pmba/1-1076 IGEPQDWTCLRLQPAFGISFVLCISILVKTNRVLLVFEAKIPTS FHRKWWGLNLQFLLV 728  
ENSCGRP00000015024036\_Cgpi/1-1081 IGEPQDWTCLRLQPAFGISFVLCISILVKTNRVLLVFEAKIPTS FHRKWWGLNLQFLLV 728  
ENSCGRP0000001016053\_Cgch/1-1081 IGEPQDWTCLRLQPAFGISFVLCISILVKTNRVLLVFEAKIPTS FHRKWWGLNLQFLLV 728  
ENSCGRP000000017369\_Cgcr/1-1081 IGEPQDWTCLRLQPAFGISFVLCISILVKTNRVLLVFEAKIPTS FHRKWWGLNLQFLLV 728  
ENSDORP000000002959\_Dord/1-1078 IGEPQDWTCLRLQPAFGISFVLCISILVKTNRVLLVFEAKIPTS FHRKWWGLNLQFLLV 728  
ENSTSY P000000002643\_Csyr/1-1015 IGEPQDWTCLRLQPAFGISFVLCISILVKTNRVLLVFEAKIPTS FHRKWWGLNLQFLLV 738  
ENSM LUP000000008249\_Mluc/1-1075 IGEPQDWTCLRLQPAFGISFVLCISILVKTNRVLLVFEAKIPTS FHRKWWGLNLQFLLV 727  
ENSECAP000000022285\_Ecab/1-1084 IGEPQDWTCLRLQPAFGISFVLCISILVKTNRVLLVFEAKIPTS FHRKWWGLNLQFLLV 728  
ENSEASP00000005022676\_Baas/1-1094 IGEPQDWTCLRLQPAFGISFVLCISILVKTNRVLLVFEAKIPTS FHRKWWGLNLQFLLV 738  
ENSCAFP000000017381\_Cfam/1-1075 IGEPQDWTCLRLQPAFGISFVLCISILVKTNRVLLVFEAKIPTS FHRKWWGLNLQFLLV 728  
ENSCAFP00000002007154\_Cldi/1-1075 IGEPQDWTCLRLQPAFGISFVLCISILVKTNRVLLVFEAKIPTS FHRKWWGLNLQFLLV 728  
ENSVVUP000000030826\_Vvul/1-1075 IGEPQDWTCLRLQPAFGISFVLCISILVKTNRVLLVFEAKIPTS FHRKWWGLNLQFLLV 728  
ENSF CAP000000008080\_Fcat/1-1081 IGEPQDWTCLRLQPAFGISFVLCISILVKTNRVLLVFEAKIPTS FHRKWWGLNLQFLLV 728  
ENSPRRP0000000023800\_Ppar/1-1081 IGEPQDWTCLRLQPAFGISFVLCISILVKTNRVLLVFEAKIPTS FHRKWWGLNLQFLLV 728  
ENSP TTP000000015042\_Ptal/1-1081 IGEPQDWTCLRLQPAFGISFVLCISILVKTNRVLLVFEAKIPTS FHRKWWGLNLQFLLV 728  
ENSM PUP000000004759\_Mpfu/1-1082 IGEPQDWTCLRLQPAFGISFVLCISILVKTNRVLLVFEAKIPTS FHRKWWGLNLQFLLV 728  
ENSNVIP000000018564\_Nvis/1-1092 IGEPQDWTCLRLQPAFGISFVLCISILVKTNRVLLVFEAKIPTS FHRKWWGLNLQFLLV 738  
ENSUMAP000000035085\_Umar/1-1071 IGEPQDWTCLRLQPAFGISFVLCISILVKTNRVLLVFEAKIPTS FHRKWWGLNLQFLLV 738  
ENSUAMP000000035930\_Uame/1-1079 IGEPQDWTCLRLQPAFGISFVLCISILVKTNRVLLVFEAKIPTS FHRKWWGLNLQFLLV 728  
ENSAMEP000000015060\_Amel/1-1089 IGEPQDWTCLRLQPAFGISFVLCISILVKTNRVLLVFEAKIPTS FHRKWWGLNLQFLLV 738  
ENSSDAP000000007437\_Sdau/1-1079 IGEPQDWTCLRLQPAFGISFVLCISILVKTNRVLLVFEAKIPTS FHRKWWGLNLQFLLV 728  
ENSSTOP000000003945\_Itri/1-1070 IGEPQDWTCLRLQPAFGISFVLCISILVKTNRVLLVFEAKIPTS FHRKWWGLNLQFLLV 728  
ENSMMPM000000015298\_Mmma/1-1083 IGEPQDWTCLRLQPAFGISFVLCISILVKTNRVLLVFEAKIPTS FHRKWWGLNLQFLLV 728  
ENSUPAP000000010025947\_Upar/1-1086 IGEPQDWTCLRLQPAFGISFVLCISILVKTNRVLLVFEAKIPTS FHRKWWGLNLQFLLV 728  
ENSSBOP0000000036416\_Sbbo/1-1078 IGEPQDWTCLRLQPAFGISFVLCISILVKTNRVLLVFEAKIPTS FHRKWWGLNLQFLLV 728  
ENSANAP0000000028404\_Anan/1-1078 IGEPQDWTCLRLQPAFGISFVLCISILVKTNRVLLVFEAKIPTS FHRKWWGLNLQFLLV 728  
ENSCCAP0000000024327\_Ccap/1-1077 IGEPQDWTCLRLQPAFGISFVLCISILVKTNRVLLVFEAKIPTS FHRKWWGLNLQFLLV 728  
ENSCJAP000000062854\_Cjac/1-1089 IGEPQDWTCLRLQPAFGISFVLCISILVKTNRVLLVFEAKIPTS FHRKWWGLNLQFLLV 738  
ENSNLEP000000000336\_Nleu/1-1088 IGEPQDWTCLRLQPAFGISFVLCISILVKTNRVLLVFEAKIPTS FHRKWWGLNLQFLLV 738  
ENSPYP000000015087\_Pabe/1-1078 IGEPQDWTCLRLQPAFGISFVLCISILVKTNRVLLVFEAKIPTS FHRKWWGLNLQFLLV 728  
ENSP000000420194\_Hsap/1-1088 IGEPQDWTCLRLQPAFGISFVLCISILVKTNRVLLVFEAKIPTS FHRKWWGLNLQFLLV 738  
ENSGGOP000000020287\_Ggor/1-1078 IGEPQDWTCLRLQPAFGISFVLCISILVKTNRVLLVFEAKIPTS FHRKWWGLNLQFLLV 728  
ENSPAP0000000026371\_Ppan/1-1078 IGEPQDWTCLRLQPAFGISFVLCISILVKTNRVLLVFEAKIPTS FHRKWWGLNLQFLLV 728  
ENSPTRP000000043342\_Ptro/1-1078 IGEPQDWTCLRLQPAFGISFVLCISILVKTNRVLLVFEAKIPTS FHRKWWGLNLQFLLV 728  
ENSCSAP000000003635\_Csab/1-882 IGEPQDWTCLRLQPAFGISFVLCISILVKTNRVLLVFEAKIPTS FHRKWWGLNLQFLLV 532  
ENSMMPU0000000061002\_Mmul/1-1078 IGEPQDWTCLRLQPAFGISFVLCISILVKTNRVLLVFEAKIPTS FHRKWWGLNLQFLLV 728  
ENSPANP000000004316\_Panu/1-1081 IGEPQDWTCLRLQPAFGISFVLCISILVKTNRVLLVFEAKIPTS FHRKWWGLNLQFLLV 731  
ENSCATP000000028615\_Caty/1-1078 IGEPQDWTCLRLQPAFGISFVLCISILVKTNRVLLVFEAKIPTS FHRKWWGLNLQFLLV 728  
ENSMFAP000000042132\_Mfas/1-1078 IGEPQDWTCLRLQPAFGISFVLCISILVKTNRVLLVFEAKIPTS FHRKWWGLNLQFLLV 728  
ENSMNEP0000000024602\_Mnem/1-1078 IGEPQDWTCLRLQPAFGISFVLCISILVKTNRVLLVFEAKIPTS FHRKWWGLNLQFLLV 728  
ENSMLEP000000008744\_Mleu/1-1088 IGEPQDWTCLRLQPAFGISFVLCISILVKTNRVLLVFEAKIPTS FHRKWWGLNLQFLLV 738  
ENSTGEP000000008766\_Tgel/1-1088 IGEPQDWTCLRLQPAFGISFVLCISILVKTNRVLLVFEAKIPTS FHRKWWGLNLQFLLV 738  
ENSCANP000000040262\_Capa/1-1088 IGEPQDWTCLRLQPAFGISFVLCISILVKTNRVLLVFEAKIPTS FHRKWWGLNLQFLLV 738  
ENSPTEP000000016080\_Ptep/1-1088 IGEPQDWTCLRLQPAFGISFVLCISILVKTNRVLLVFEAKIPTS FHRKWWGLNLQFLLV 738  
ENSRBIP000000006831\_Rbie/1-1078 IGEPQDWTCLRLQPAFGISFVLCISILVKTNRVLLVFEAKIPTS FHRKWWGLNLQFLLV 728  
ENSRROP0000000007818\_Rrox/1-1088 IGEPQDWTCLRLQPAFGISFVLCISILVKTNRVLLVFEAKIPTS FHRKWWGLNLQFLLV 738  
ENSOGAP000000002850\_Ogar/1-1077 IGEPQDWTCLRLQPAFGISFVLCISILVKTNRVLLVFEAKIPTS FHRKWWGLNLQFLLV 728  
ENSMICP0000000050654\_Mmur/1-1075 IGEPQDWTCLRLQPAFGISFVLCISILVKTNRVLLVFEAKIPTS FHRKWWGLNLQFLLV 728  
ENSPCOP000000009624\_Pcod/1-1076 IGEPQDWTCLRLQPAFGISFVLCISILVKTNRVLLVFEAKIPTS FHRKWWGLNLQFLLV 728  
ENSPSPM000000007909\_Psim/1-1084 IGEPQDWTCLRLQPAFGISFVLCISILVKTNRVLLVFEAKIPTS FHRKWWGLNLQFLLV 738  
\*\*\*\*\*.\*.\* \*\*\*\*\* \*\*\*\*\*:\*\*\*\*\*.:\*.\* \*\*\*\*\*.:\*:\*\*\*\*\*:\*

ENSM EUP000000013310\_Neug/1-956 FLCTFMQIVICVIWLYNAPPSSYRNHELEDEIIFVTCHEGSLMALGFLIGYTCLLAAICF 734  
ENSTBEP000000002487\_Tbel/1-914 FLCTFMQIVICVIWLYNAPPSSYRNHELEDEIIFVTCHEGSLMALGFLIGYTCLLAAICF 633  
ENSPCAP0000000000755\_Pcap/1-1085 FLCTFMQIVICVIWLYNAPPSSYRNHELEDEIIFVTCHEGSLMALGFLIGYTCLLAAVCF 792  
ENSCHOP000000011907\_Chof/1-954 FLCTFMQIVICVIWLYNAPPSSYRNHELEDEIIFVTCHEGSLMALGFLIGYTCLLAAICF 797  
ENSVAP0000000001982\_Vpac/1-1087 FLCTFMQIVICVIWLYNAPPSSYRNHELEDEIIFVTCHEGSLMALGFLIGYTCLLAAICF 797  
ENSEEUP0000000009670\_Eeur/1-946 FLCTFMQIVICVIWLYNAPPSSYRNHELEDEIIFVTCHEGSLMALGFLIGYTCLLAAICF 662  
ENSOANP000000015961\_Oana/1-1083 FLCTLVQVVICAIWLYNAPPSSYRNHELEDEIIFVTCHEGSLMALGFLIGYTCLLAAVCF 788  
ENSOPRP000000000261\_Opri/1-1082 FLCTFMQIVICVIWLYNAPPSSYRNHELEDEIIFVTCHEGSLMALGFLIGYTCLLAAVCF 798  
ENSJJAP0000000004721\_Jjac/1-1084 FLCTFMQIVICVIWLYNAPPSSYRNHELEDEIIFVTCHEGSLMALGFLIGYTCLLAAICF 764  
ENSPCIP000000034747\_Pcin/1-1018 FLCTFMQIVICVIWLYNAPPSSYRNHELEDEIIFVTCHEGSLMALGFLIGYTCLLAAICF 736  
ENSMODP0000000022810\_Mdom/1-1069 FLCTFMQIVICVIWLYNAPPSSYRNHELEDEIIFVTCHEGSLMALGFLIGYTCLLAAICF 789  
ENSVURP000000010007344\_Vdum/1-1070 FLCTFMQIVICVIWLYNAPPSSYRNHELEDEIIFVTCHEGSLMALGFLIGYTCLLAAICF 789  
ENSSHAP000000014890\_Shar/1-1072 FLCTFMQIVICVIWLYNAPPSSYRNHELEDEIIFVTCHEGSLMALGFLIGYTCLLAAICF 789  
ENSM AUP000000005394\_Maur/1-954 FLCTFMQIVICVIWLYNAPPSSYRNHELEDEIIFVTCHEGSLMALGFLIGYTCLLAAICF 737  
ENSCUP0000000025672\_Ocun/1-1063 FLCTFMQIVICVIWLYNAPPSSYRNHELEDEIIFVTCHEGSLMALGFLIGYTCLLAAICF 788







ENSMEUP00000013310\_Neug/1-956 TPSSSMS-SKSNSEDPFPQPEREKQQQQQLQQ-----QQQQPLTFPQQ 896  
ENSTBEP00000002487\_Tbel/1-914 TPSSSIS-SKSNSEDPFPQPERQKQHPLALT-----QQE-----P 788  
ENSPCAP00000000755\_Pcap/1-1085 TPSSSIS-SKSNSEDPFPQPEGLKQQQPLALM-----PQPQPQLLTLQQQQQQ 960  
ENSCHOP00000011907\_Chof/1-954 TPSSSIS--SINSEDSFPQPEKQKQQQQQPL-ALTQPEQ----- 954  
ENSVPA00000001982\_Vpac/1-1087 TPSSSIS-SKSNSEDPFPQPERKQQQPLALTQHVP-----PPQPSNPQP 961  
ENSEEUP00000009670\_Eeur/1-946 TPSSSIS-SKSNSEDPFPQPERKQQQPLALTQ-----QEQQPQ 820  
ENSOANP00000015961\_Oana/1-1083 TPSSSIS-TKSNAEEAAGRPEPWQRQGVPPP-GSQ-----GSQGPAPQR 952  
ENSOPRP00000000261\_Opri/1-1082 TPSSSIS-SKSNSEDPFPQSERLQKPPPLAS-----PQGP 955  
ENSJJAP00000004721\_Jjac/1-1084 LPSSSISGSGGGDDAAPPQDPGKQPQPPLALTQPEQHLHQQQQQQ---QQQQPR 940  
ENSPCIP00000034747\_Pcin/1-1018 TPSSSIS-SKSNSEDPFPQPEREKQQQQQT-----LT-P-QQQ 892  
ENSMODP00000022810\_Mdom/1-1069 TPSSSIS-SKSNSEDPFPQPEREKQQQQQF-----L-TFQ 943  
ENSVURP00010007344\_Vurs/1-1070 TPSSSIS-SKSNSEDPFPQPEREKQQQQQ-----QTLT-PQQ 944  
ENSSHAP00000014890\_Shar/1-1072 TPSSSIS-SKSNSEDPFPQPDREKQQQQQQ-----QPLT-PQQ 946  
ENSMAUP00000005394\_Maur/1-954 IPSSSIS-SKSNSEDPFPQPERKQQQPLRSMCQHILAWCLTPNKH----- 904  
ENSOCUP00000025672\_Ocun/1-1063 TPSSSIS-SKSNSEDPFPQPERKQQQPPPLCPAAAA----- 968  
ENSPVAP00000011981\_Pvam/1-1085 TPSSSIS-SKSNSEDPFPQPEGQKQ---QPLALTQEQQR-----QPQLPLTIQ 959  
ENSETEP00000011160\_Etel/1-1024 TPSSSIS-SKSNSEDPFPQEAERPKQQPLTLTQDE-----RQDQ 898  
ENSFDAP00000010532\_Fdam/1-1108 IPSSSIS-SKSNSEDPFPQPERKQQQP---LALTQEQ-----Q-HPMTLQLQP 982  
ENSODEP00000013257\_Odeg/1-1070 IPSSSIS-SKSNSEDPFPQPERKQQHP---LQQQ-----QQQ-QPMLQPQP 953  
ENSHGLP00000002019\_Hgfe/1-1108 IPSSSIS-SKSNSEDPFPQPERKQQRP---LALTQEQ-----Q-QPVLTPQP 983  
ENSCLAP00000021334\_Clan/1-1114 IPSSSIS-SKSNSEDPFPQPERKQQRP---PALTQEQ-----QAVTLQPQP 989  
ENSCAPP00000014352\_Cape/1-1068 IPSSSIS-SKSNSEDPFPQPERKQQWP---VALTQEQ-----QQPQP 954  
ENSCPOP00000011795\_Cpor/1-1071 IPSSVQVAVARATAKIPSHSPPRCNSGP---VALTQEQ-----Q-HPVLTPQP 957  
ENSSARP00000006151\_Sara/1-1085 TPSSSIS-SKSNSEDPFPQPERKQQ---Q-QPLALPQEQPPQL-----QQQP 959  
ENSLAFP00000018459\_Lafr/1-1090 TPSSSIS-SKSNSEDPFPQPERK---QE---QPLALTQEQ-----PL---TLRR 964  
ENSDNOP000000011819\_Dnov/1-1075 TPSSSIS-SKSNSEDPFPQPEGQKQRP---LALTQEQ-----QPLA 949  
ENSSSCP00000041077\_Sscr/1-1089 TPSSSIS-SKSNSEDPFPQPERKQQ---PLALTQ---HVQ-----PQAPSTPQP 963  
ENSTTRP00000001326\_Ttru/1-1091 TPSSSIS-SKSNSEDPFPQPERK---QQ---QPLALTQ---CAQPQ-----PRPSTLQL 965  
ENSBBP00000002858\_Bbbi/1-1068 TPSSSIS-SKSNSEDPFPQEQPKRQKQP---QPLALSPHN----- 943  
ENSOARP00000021602\_Oari/1-1032 TPSSSIS-SKSNSE----- 922  
ENSCHIP00000033385\_Chir/1-1085 TPSSSIS-SKSNSEDPFPQPERKQP---QPLALSPHNAQQPQ-----PRPSTPQP 959  
ENSBTAP000000059078\_Btau/1-1085 TPSSSIS-SKSNSEDPFPQEQPKRQKQP---QPLALSPHNAQQPQ-----PRPSTPQP 959  
ENSBIXP00000038534\_Bthy/1-1085 TPSSSIS-SKSNSEDPFPQEQPKRQKQP---QPLALSPHNAQQPQ-----PRPSTPQP 959  
ENSBMUP00000019115\_Bmut/1-1081 TPSSSIS-SKSNSEDPFPQEQ---KQP---QPLALSPHNAQQPQ-----PRPSTPQP 955  
ENSBIXP000000503570\_Bihy/1-1085 TPSSSIS-SKSNSEDPFPQEQPKRQKQP---QPLALSPHNAQQPQ-----PRPSTPQP 959  
ENSMUGP00000006365\_Mung/1-1080 IPSSSIS-SKSNSEDPFPQPERKQQQP---L-ALTQEQ---Q-----QPLALQPQ 954  
ENSRNOP000000069629\_Rnor/1-1079 IPSSSIS-SKSNSEDRFPQPERKQQQP---L-SLTQEQ---Q-----QPLTLHPQ 953  
MGP\_PahariEiJ\_P0028852\_Mpah/1-1003 IPSSSIS-SKSNSEDRFPQPERKQQQP---L-ALTQEQ---Q-----QPLTLQPQ 877  
MGP\_SPRETEiJ\_P0043347\_Mspr/1-1079 IPSSSIS-SKSNSEDRFPQPERKQQQP---L-ALTQEQ---Q-----QPLTLQPQ 953  
ENSMUSP00000069080\_Mmus/1-1079 IPSSSIS-SKSNSEDRFPQPERKQQQP---L-ALTQEQ---Q-----QPLTLQPQ 953  
ENSMOCP00000010340\_Moch/1-1076 IPSSI-S-SKSNSEDPFPQLERKQQQR---L-KQQQQQQQ-----PLTLQ 950  
ENSPEMP00000029995\_Pmba/1-1076 IPSSSIS-SKSNSEDPFPQERRKQQQP---L-ALTQEQ---Q-----P-LALQ 953  
ENSCGRP00015024036\_Cgpi/1-1081 IPSSSIS-SKSNSEDPFPQPERKQQQP---L-ALSQQEQPQ-----QPLTLQQ 955  
ENSCGRP00001016053\_Cgch/1-1081 IPSSSIS-SKSNSEDPFPQPERKQQQP---L-ALSQQEQPQ-----QPLTLQQ 955  
ENSCGRP00000017369\_Cgcr/1-1081 IPSSSIS-SKSNSEDPFPQPERKQQQP---L-ALSQQEQPQ-----QPLTLQQ 955  
ENSDORP00000002959\_Dord/1-1078 IPSSSIS-SKSNSEDPFPQPERKQQPP---P-LQ-----QQQ---QQPLAL-QP 951  
ENSTSY00000002643\_Csyr/1-1015 -----SP 889  
ENSMMLP00000008249\_Mluc/1-1075 TPSSSIS-SKSNSEDPFPQPERKQP---QPLALPQEQPQPQ-----P-PS 950  
ENSECAP00000002285\_Ecab/1-1084 TPSSSIS-SKSNSEDPFPQPERKQP---QPLALTQEQ-----QPLTL---QQ 958  
ENSEASP000005022676\_Eaas/1-1094 TPSSSIS-SKSNSEDPFPQPERKQP---QPLALTQEQ-----QPLTL---QQ 968  
ENSCAFP00000017381\_Cfam/1-1075 TPSSSIS-SKSNSEDPFPQPERKQP---QPLALTQEQ-----PP---QPL----- 949  
ENSCAFP000200007154\_Cldi/1-1075 TPSSSIS-SKSNSEDPFPQPERKQP---QPLALTQEQ-----PP---QPL----- 949  
ENSVVUP00000030826\_Vvul/1-1075 TPSSSIS-SKSNSEDPFPQPERKQP---QPLALTQEQ-----PP---QPL----- 949  
ENSFCA00000008080\_Fcat/1-1081 TPSSSIS-SKSNSEDPFPQPERKQP---QPLALTQEQ-----PQ---PQPSSL-QQ 955  
ENSPRRP00000002380\_Ppar/1-1081 TPSSSIS-SKSNSEDPFPQPERKQP---QPLALTQEQ-----PQ---PQPSSL-QQ 955  
ENSPTIP00000015042\_Ptal/1-1081 TPSSSIS-SKSNSEDPFPQPERKQP---QPLALTQEQ-----PQ---PQPSSL-QQ 955  
ENSMMPUP0000004759\_Mpfi/1-1082 TPSSSIS-SKSNSEDPFPQPERKQQQ---QPLALTQEQ-----PQ---QPLTLQQ-QP 956  
ENSNVIP00000018564\_Nvis/1-1092 TPSSSIS-SKSNSEDPFPQPERKQQQ---QPLALTQEQ-----LQ---QPLTLQQ-QP 966  
ENSUMAP00000035085\_Umar/1-1071 TPSSSIS-SKSNSEDPFPQPERKQP---QPLALTQEQ-----PQ---QPLTLQQ-Q 964  
ENSUAMP00000035930\_Uame/1-1079 TPSSSIS-SKSNSEDPFPQPERKQP---QPLALTQEQ-----PQ---QPLTLQQ-Q 954  
ENSAMEP00000015060\_Amel/1-1089 TPSSSIS-SKSNSEDPFPQPERKQP---QPLALTQEQ-----PQ---QPLTLQQ-Q 964  
ENSSDAP00000007437\_Sdau/1-1079 XXXXXXXXXXXXXXXXXXXXXXXXXXXX-----XXXXXXXXQQQ---QPLTL-Q-PQ 953  
ENSSTOP00000003945\_Itri/1-1070 LPSSSIS-SKSNSEDPFPQPERKQQQ---QPLALTQEQ----- 944  
ENSMMP00000015298\_Mmma/1-1083 LPSSSIS-SKSNSEDPFPQPERKQP---QPLALTQEQ---QQQQ---QPLTL-Q-PQ 957  
ENSUPAP00010025947\_Upar/1-1086 LPSSSIS-SKSNSEDPFPQPERKQQQ---QPLALTQEQ---QQQQ---QPLTL-Q-PQ 960  
ENSSBOP00000036416\_Sbbo/1-1078 TPSSSIS-SKSNSEDPFPQPERKQP---QPLALTQEQ---Q---QSLTL-Q-Q 952  
ENSANAP000000028404\_Anan/1-1078 TPSSSIS-SKSNSEDPFPQPERKQP---QPLALTQEQ---Q---QPLTL-Q-Q 952  
ENSCCAP00000024327\_Ccap/1-1077 TPSSSIS-SKSNSEDPFPQPERKQP---QPLALTQEQ---Q---QPLTL-Q-Q 951  
ENSCJAP00000062854\_Cjac/1-1089 TPSSSIS-SKSNSEDPFPQPERKQP---QPLALTQEQ---Q---QPLTL-Q-Q 963  
ENSNLEP00000000336\_Nleu/1-1088 TPSSSIS-SKSNSEDPFPQPERKQP---QPLALTQEQ---Q---QPLTL-P-Q 962  
ENSPYP00000015087\_Pabe/1-1078 TPSSSIS-SKSNSEDPFPQPERKQP---QPLALTQEQ---Q---Q---QPLTL-P-Q 952  
ENSP00000420194\_Hsap/1-1088 TPSSSIS-SKSNSEDPFPQPERKQP---QPLALTQEQ---Q---Q---QPLTL-P-Q 962  
ENSGGOP00000020287\_Ggor/1-1078 TPSSSIS-SKSNSEDPFPQPERKQP---QPLALTQEQ---Q---Q---QPLTL-P-Q 952  
ENSPAP00000026371\_Ppan/1-1078 TPSSSIS-SKSNSEDPFPQPERKQP---QPLALTQEQ---Q---Q---QPLTL-P-Q 952  
ENSPTRP00000043342\_Ptro/1-1078 TPSSSIS-SKSNSEDPFPQPERKQP---QPLALTQEQ---Q---Q---QPLTL-P-Q 952  
ENSCSAP00000003635\_Csab/1-882 TPSSSIS-SKSNSEDPFPQPERKQP---QPLALTQEQ---Q---Q---QPLTL-P-Q 756  
ENSMMPUP00000061002\_Mmul/1-1078 TPSSSIS-SKSNSEDPFPQPERKQP---QPLALTQEQ---Q---Q---QPLTL-P-Q 952  
ENSPANP00000004316\_Panu/1-1081 TPSSSIS-SKSNSEDPFPQPERKQP---QPLALTQEQ---Q---Q---QPLTL-P-Q 955  
ENSCATP00000028615\_Caty/1-1078 TPSSSIS-SKSNSEDPFPQPERKQP---QPLALTQEQ---Q---Q---QPLTL-P-Q 952  
ENSMFAP00000042132\_Mfas/1-1078 TPSSSIS-SKSNSEDPFPQPERKQP---QPLALTQEQ---Q---Q---QPLTL-P-Q 952  
ENSMNEP00000024602\_Mnem/1-1078 TPSSSIS-SKSNSEDPFPQPERKQP---QPLALTQEQ---Q---Q---QPLTL-P-Q 952  
ENSMLEP00000008744\_Mleu/1-1088 TPSSSIS-SKSNSEDPFPQPERKQP---QPLALTQEQ---Q---Q---QPLTL-P-Q 962  
ENSTGEP00000008766\_Tgel/1-1088 TPSSSIS-SKSNSEDPFPQPERKQP---QPLALTQEQ---Q---Q---QPLTL-P-Q 962  
ENSCANP00000040262\_Capa/1-1088 TPSSSIS-SKSNSEDPFPQPERKQP---QPLALTQEQ---Q---Q---QPLTL-L-Q 962  
ENSTPEP00000016080\_Ptep/1-1088 TPSSSIS-SKSNSEDPFPQPERKQP---QPLALTQEQ---Q---Q---QPLTL-P-Q 962  
ENSRBIP00000006831\_Rbie/1-1078 TPSSSIS-SKSNSEDPFPQPERKQP---QPLALTQEQ---P---Q---QPLTL-P-Q 952  
ENSRROP00000007818\_Rrox/1-1088 TPSSSIS-SKSNSEDPFPQPERKQP---QPLALTQEQ---P---Q---QPLTL-P-Q 962  
ENSOGAP00000002850\_Ogar/1-1077 TPSSSIS-SKSNSEDPFPQPERKQP---PPALTSQEQ-----QPLTL-Q---Q 951

ENSMICP00000050654\_Mmur/1-1075  
ENSPCOP00000009624\_Pcoq/1-1076  
ENSPSMP00000007909\_Psim/1-1084

TPSSSIS-SKSNSEDPFPQDRKQPQ----PPALTQQEQQ-----QQP-L-A--- 949  
TPSSSIS-SKSNSEDPFPQPERKQKQ----QPALTQQEQQ-----QQP-L-T--L 950  
TPSSSIS-SKSNSEDPFPQPERKQRQ----QPALTQPEQQ-----QQP-L----- 958

ENSMEUP00000013310\_Neug/1-956  
ENSTBEP00000002487\_Tbel/1-914  
ENSPCAP00000000755\_Pcap/1-1085  
ENSCPOP00000011907\_Chof/1-954  
ENSVPAP00000001982\_Vpac/1-1087  
ENSEEUP00000009670\_Beur/1-946  
ENSOANP00000015961\_Oana/1-1083  
ENSOPRP00000000261\_Opri/1-1082  
ENSFJAP00000004721\_Jjac/1-1084  
ENSPCIP00000034747\_Pcin/1-1018  
ENSMODP00000022810\_Mdom/1-1069  
ENSVURP00010007344\_Vurs/1-1070  
ENSSHAP00000014890\_Shar/1-1072  
ENSMAPU00000005394\_Maur/1-954  
ENSOCUP000000025672\_Ocur/1-1063  
ENSPVAP00000011981\_Pvam/1-1085  
ENSETEP00000011160\_Etel/1-1024  
ENSFADAP00000021334\_Oar/1-1108  
ENSODEP00000013257\_Odeg/1-1070  
ENSHGLP00000002019\_Hgfe/1-1108  
ENSC LAP000000021334\_Clan/1-1114  
ENSCAPP00000014352\_Cape/1-1068  
ENSCPOP00000011705\_Cpor/1-1071  
ENSSARP000000006151\_Sara/1-1085  
ENSLAFP00000018459\_Lafr/1-1090  
ENSDNOP00000011819\_Dnov/1-1075  
ENSSSCP000000041077\_Sscr/1-1089  
ENSTTRP00000001326\_Ttru/1-1091  
ENSBEBP00000002858\_Ebbi/1-1068  
ENSOARP000000021602\_Oari/1-1032  
ENSCHIP00000033385\_Chir/1-1085  
ENSBTAP000000059078\_Btau/1-1085  
ENSBIXP000000038534\_Bthy/1-1085  
ENSBMUP00000019115\_Bmut/1-1081  
ENSBIXP000000030570\_Bihy/1-1085  
ENSMUGP000000006365\_Mung/1-1080  
ENSRNOP00000006929\_Rnor/1-1079  
MGP\_PahariEiJ\_P0028852\_Mpah/1-1003  
MGP\_SPRETEiJ\_P0043347\_Mspr/1-1079  
ENSMUSP000000069080\_Mmus/1-1079  
ENSMOCP00000010340\_Moch/1-1076  
ENSPMP000000029995\_Pmba/1-1076  
ENSCGRP00015024036\_Cgpi/1-1081  
ENSCGRP00001016053\_Cgch/1-1081  
ENSCGRP000000017369\_Cgcr/1-1081  
ENSDORP00000002959\_Dord/1-1078  
ENSTSY000000002643\_Csyr/1-1015  
ENSM LUP00000008249\_Mluc/1-1075  
ENSECAP000000022285\_Ecab/1-1084  
ENSEASP000005022676\_Eaas/1-1094  
ENSCAFP00000017381\_Cfam/1-1075  
ENSCAFP00020007154\_Cldi/1-1075  
ENSVVUP000000030826\_Vvul/1-1075  
ENSFCA000000008080\_Fcat/1-1081  
ENSPPRP00000023800\_Ppar/1-1081  
ENSP TIP000000015042\_Ptal/1-1081  
ENSM PUP00000004759\_Mpfu/1-1082  
ENSNVIP00000018564\_Nvis/1-1092  
ENSUMAP000000035085\_Umar/1-1071  
ENSUAMP00000035930\_Uame/1-1079  
ENSAMEP00000015060\_Amel/1-1089  
ENSSDAP000000007437\_Sdau/1-1079  
ENSSTOP00000003945\_Itri/1-1070  
ENSMMP00000015298\_Mmma/1-1083  
ENSUPAP00010025947\_Upar/1-1086  
ENSSBOP00000036416\_Sbbo/1-1078  
ENSANAP000000028404\_Anan/1-1078  
ENSCCAP000000024327\_Ccap/1-1077  
ENSCJAP00000062854\_Cjac/1-1089  
ENSNLEP00000000336\_Nleu/1-1088  
ENSPYP000000015087\_Pabe/1-1078  
ENSP00000420194\_Hsap/1-1088  
ENSGGOP000000020287\_Ggor/1-1078  
ENSPAP000000026371\_Ppan/1-1078  
ENSPTRP00000043342\_Ptro/1-1078  
ENSCSAP000000003635\_Csab/1-882  
ENSM MUP000000061002\_Mmul/1-1078  
ENSPANP00000004316\_Panu/1-1081  
ENSCATP000000028615\_Caty/1-1078  
ENSMFAP000000042132\_Mfas/1-1078  
ENSMNEP000000024602\_Mnem/1-1078  
ENSMLEP00000008744\_Mleu/1-1088  
ENSTGEP000000008766\_Tgel/1-1088

QRPQQQHRCKQKQVIFGSGTVTFSLFDEPQKNAMAH-----KTKQQNSLEAQNS- 946  
QPQQSQPRCKQKQVIFGSGTVTFSLFDEPQKNNTA-----HRNSTHONSLEAOKG- 839  
QQQQQQPRCKQKQVIFGSGTVTFSLFDEPQKNAMA-----HRNSTHNSLEAOKS- 1011  
-----VIVNMI----- 954  
QPQQSQQLSCKQKQVIFGSGTVTFSLFDEPQKSAVA-----HRNSTHONSLEAOKN- 1012  
PQPQQQPRCKQKQVIFGSGTVTFSLFDEPQKATG-----HRNSTHONSLEAOKG- 871  
GTPPPPPRCKQKQVIFGSGTVTFSLFDEPQKNDAGA-----HRHGRRRHSLEPQDSG 1004  
QQQPPHQPCKQKQVIFGSGTVTFSLFDEPQKNAMT-----PRNSQRQNPTEAOKS- 1006  
LQQQPPQPRCKQKQVIFGSGTVTFSLFDEPQKNATA-----HRNSTHONSLEAOKS- 999  
RPQQQQHRCKQKQVIFGSGTVTFSLFDEPQKNAMS-----HKVTKQQNSLEAOKS- 943  
PQRFPQQHRCKQKQVIFGSGTVTFSLFDEPQKNATA-----HKVAKQQNSLEAOKS- 994  
QRPQQQHRCKQKQVIFGSGTVTFSLFDEPQKNAMA-----HKVTKQQNSLEAOKS- 995  
QRPQQQHRCKQKQVIFGSGTVTFSLFDEPQKNAMA-----HKVAKQQNSLEAOKS- 997  
-----VIVNMI----- 910  
AAASAAASKCKQKQVIFGSGTVTFSLFDEPQKNAMA-----PRNSMHRNSLEAOKS- 1019  
QQQSQQQPRCKQKQVIFGSGTVTFSLFDEPQKSATA-----HRNSIHONSLEAOKS- 1010  
QQQAQQQPRCKQKQVIFGSGTVTFSLFDEPQKNAMA-----QRNPTHHNSLEAOKS- 949  
-QOSQPQPRCKQKQVIFGSGTVTFSLFDEPQKNITA-----HRNATHNSLEAOKS- 1032  
-QPSQPQPRCKQKQVIFGSGTVTFSLFDEPQKNAMV-----HRNATHONSLEAOKS- 1003  
-QOSQPQPRCKQKQVIFGSGTVTFSLFDEPQKNAMA-----HRNTHONSLEAOKS- 1033  
-QOSQPQPRCKQKQVIFGSGTVTFSLFDEPQKNMT-----HRNATHNSLEAOKS- 1039  
-QOSQPQPRCKQKQVIFGSGTVTFSLFDEPQKNATA-----HRHATHONSLEAOKN- 1004  
-QOSQPQPRCKQKQVIFGSGTVTFSLFDEPQKNATA-----HRHATHONSLEAOKN- 1007  
TPQSQQPQPRCKQKQVIFGSGTVTFSLFDEPQKSALT-----PRNSTHONSLEAOKS- 1010  
QQQTQQQPRCKQKQVIFGSGTVTFSLFDEPQKNAMA-----HRNSTHONSLEAOKS- 1015  
PQQQQQQPRCKQKQVIFGSGTVTFSLFDEPQKNAVA-----HRNSTHONSLEAOKS- 1000  
PQNLQQQPRCKQKQVIFGSGTVTFSLFDEPQKSATA-----HRNSTHONSLEAOKN- 1014  
QQQSQQQPRCKQKQVIFGSGTVTFSLFDEPQKSAMA-----HRNSTHONSLEAOKN- 1016  
-PQSQQPQPRCKQKQVIFGSGTVTFSLFDEPQKSAVA-----HRNSTHONSLEAOKN- 993  
-----DRGTVTTFSLFDEPQKSAVA-----HRNSTHONSLEAOKN- 957  
QPQQSQPPRCKQKQVIFGSGTVTFSLFDEPQKSAVA-----HRNSTHONSLEAOKN- 1010  
QPQQSQPPRCKQKQVIFGSGTVTFSLFDEPQKTAVA-----HRNSTHONSLEAOKN- 1010  
PQSQSQPQPRCKQKQVIFGSGTVTFSLFDEPQKSAVA-----HRNSTHONSLEAOKN- 1010  
QPQQSQPPRCKQKQVIFGSGTVTFSLFDEPQKSAVA-----HRNSTHONSLEAOKN- 1006  
PQSQSQPQPRCKQKQVIFGSGTVTFSLFDEPQKSAVA-----HRNSTHONSLEAOKN- 1010  
PQSQSQPQPRCKQKQVIFGSGTVTFSLFDEPQKNAVA-----HRNSVRQNSLEAOKS- 1005  
QQQQPQPRCKQKQVIFGSGTVTFSLFDEPQKNAMA-----HRNSMRQNSLEAOKS- 1004  
QQQQPQPRCKQKQVIFGSGTVTFSLFDEPQKNAMA-----HRNSVRQNSLEAOKS- 928  
QQQQPQPRCKQKQVIFGSGTVTFSLFDEPQKNAMA-----HRNSMRQNSLEAOKS- 1004  
QQQQPQPRCKQKQVIFGSGTVTFSLFDEPQKNAMA-----HRNSMRQNSLEAOKS- 1004  
KQQQPQPRCKQKQVIFGSGTVTFSLFDEPQKSAMA-----HRNSTRHNSLEAOKS- 1004  
QQQPQQPRCKQKQVIFGSGTVTFSLFDEPQKSAMG-----HRNSIRQNSLEAOKS- 1006  
QQQPQQPRCKQKQVIFGSGTVTFSLFDEPQKNAMA-----HRNSMRQNSLEAOKS- 1006  
QQQPQQPRCKQKQVIFGSGTVTFSLFDEPQKNAMA-----HRNSMRQNSLEAOKS- 1006  
QQQPQQPRCKQKQVIFGSGTVTFSLFDEPQKNAMA-----HRNSMRQNSLEAOKS- 1006  
QPLQQQPPRCKQKQVIFGSGTVTFSLFDEPQKNAMA-----HRNSTPQNSLEAOKS- 1002  
QHNSRQPRCKQKQVIFGSGTVTFSLFDEPQKNAMA-----HRNATHONSLEAOKS- 940  
ALQPQQPRCKQKQVIFGSGTVTFSLFDEPQKSAAA-----HRNSTHONSLEAOKS- 1000  
QQQAQQQPRCKQKQVIFGSGTVTFSLFDEPQKSAMA-----HRNSTHONSLEAOKS- 1009  
QQQAQQQPRCKQKQVIFGSGTVTFSLFDEPQKSAMA-----HRNSTHONSLEAOKS- 1019  
TLPPQPQPRCKQKQVIFGSGTVTFSLFDEPQKSAAA-----PRNSTLQNSLEAOKS- 1000  
TLPPQPQPRCKQKQVIFGSGTVTFSLFDEPQKSAAA-----PRNSTLQNSLEAOKS- 1000  
TLPPQPQPRCKQKQVIFGSGTVTFSLFDEPQKSAAA-----PRNSTLQNSLEAOKS- 1000  
QPQPQPQPRCKQKQVIFGSGTVTFSLFDEPQKSAMA-----HRNSMHONSLEAOKS- 1006  
QPQPQPQPRCKQKQVIFGSGTVTFSLFDEPQKSAMA-----HRNSMHONSLEAOKS- 1006  
QPQPQPQPRCKQKQVIFGSGTVTFSLFDEPQKSAMA-----HRNSMHONSLEAOKS- 1006  
QPQPQPQPRCKQKQVIFGSGTVTFSLFDEPQKSAMA-----HRNSTHONSLEAOKS- 1007  
QPQPQPQPRCKQKQVIFGSGTVTFSLFDEPQKSAMA-----HRNSTHONSLEAOKS- 1017  
-PQPQPQPRCKQKQVIFGSGTVTFSLFDEPQKSAM----- 998  
-PQPQPQPRCKQKQVIFGSGTVTFSLFDEPQKSAMA-----HRNATHONSLEAOKS- 1004  
-PQPQPQPRCKQKQVIFGSGTVTFSLFDEPQKSAMA-----HRNATHONSLEAOKS- 1014  
QQQSQQQPRCKQKQVIFGSGTVTFSLFDEPQKNAMA-----HRNSTHONSLEAOKS- 1004  
QQQSQQQPRCKQKQVIFGSGTVTFSLFDEPQKNAMA-----HRNSTHONSLEAOKS- 995  
QQQSQQQPRCKQKQVIFGSGTVTFSLFDEPQKNAMA-----HRNSTHONSLEAOKS- 1008  
QQQSQQQPRCKQKQVIFGSGTVTFSLFDEPQKNAMA-----HRNSTHONSLEAOKS- 1011  
QQQSQQQPRCKQKQVIFGSGTVTFSLFDEPQKNAMA-----HRNSTHONSLEAOKS- 1003  
QQQSQQQPRCKQKQVIFGSGTVTFSLFDEPQKNAMA-----HRNSTHONSLEAOKS- 1003  
QQQSQQQPRCKQKQVIFGSGTVTFSLFDEPQKNATA-----HRNSMHONSLEAOKS- 1002  
QQHQQQPRCKQKQVIFGSGTVTFSLFDEPQKNAMA-----HRNSMHONSLEAOKS- 1014  
QQQSQQQPRCKQKQVIFGSGTVTFSLFDEPQKNAMA-----HRNSTHONSLEAOKS- 1013  
QQQSQQQPRCKQKQVIFGSGTVTFSLFDEPQKNAMA-----HRNSTHONSLEAOKS- 1003  
QQRSSQQPRCKQKQVIFGSGTVTFSLFDEPQKNAMA-----HRNSTHONSLEAOKS- 1013  
QQQSQQQPRCKQKQVIFGSGTVTFSLFDEPQKNAMA-----HRNSTHONSLEAOKS- 1003  
QQQSQQQPRCKQKQVIFGSGTVTFSLFDEPQKNAMA-----HRNSTHONSLEAOKS- 1003  
QQQSQQQPRCKQKQVIFGSGTVTFSLFDEPQKNAMA-----HRNSTHONSLEAOKS- 1003  
QQQSQQQPRCKQKQVIFGSGTVTFSLFDEPQKNAMA-----HRNSTHONSLEAOKS- 807  
QQQSQQQPRCKQKQVIFGSGTVTFSLFDEPQKNAMA-----HRNSTHONSLEAOKS- 1003  
QQQSQQQPRCKQKQVIFGSGTVTFSLFDEPQKNAMA-----HRNSTHONSLEAOKS- 1006  
QQQSQQQPRCKQKQVIFGSGTVTFSLFDEPQKNAMA-----HRNSTHONSLEAOKS- 1003  
QQQSQQQPRCKQKQVIFGSGTVTFSLFDEPQKNAMA-----HRNSTHONSLEAOKS- 1003  
QQQSQQQPRCKQKQVIFGSGTVTFSLFDEPQKNAMA-----HRNSTHONSLEAOKS- 1003  
QQQSQQQPRCKQKQVIFGSGTVTFSLFDEPQKNAMA-----HRNSTHONSLEAOKS- 1003  
QQQSQQQPRCKQKQVIFGSGTVTFSLFDEPQKNAMA-----HRNSTHONSLEAOKS- 1013  
QQQSQQQPRCKQKQVIFGSGTVTFSLFDEPQKNAMA-----HRNSTHONSLEAOKS- 1013

ENSCANP00000040262\_Capa/1-1088 QQQSQQQPRCKQKQVIFGSGVTVTFSLSFDEPQKNAMA-----HRNSTHQNSLEAQKS- 1013  
ENSPTEP00000016080\_Ptep/1-1088 QQQSQQQPRCKQKQVIFGSGVTVTFSLSFDEPQKNAMA-----HRNSTHQNSLEAQKS- 1013  
ENSRBIP00000006831\_Rbie/1-1078 QQQSQQQPRCKQKQVIFGSGVTVTFSLSFDEPQKNAMA-----HRNSTHQNSLEAQKS- 1003  
ENSRROP00000007818\_Rrox/1-1088 QQQSQQQPRCKQKQVIFGSGVTVTFSLSFDEPQKNAMA-----HRNSTHQNSLEAQKS- 1013  
ENSOGAP00000002850\_Ogar/1-1077 QPPPQQPQRCKQKQVIFGSGVTVTFSLSFDEPQKNAPA-----HRNSAHQNSLEAQKS- 1002  
ENSMICP00000005654\_Mmur/1-1075 LQQPQQPQRCKQKQVIFGSGVTVTFSLSFDEPQKNATA-----HRNSTPRNSLEAQKS- 1000  
ENSPCOP00000009624\_Pcoq/1-1076 QQQPQQPQRCKQKQVIFGSGVTVTFSLSFDEPQKNATA-----HRNSTPQNSLEAQKT- 1001  
ENSPSPM00000007909\_Psim/1-1084 TLQPQQPQRCKQKQVIFGSGVTVTFSLSFDEPQKNATA-----HRNSTPQNSLEAQKG- 1009

ENSMEUP00000013310\_Neug/1-956 --GDSLRRQAL----- 956  
ENSTBEP00000002487\_Tbel/1-914 --SDALTRHQALLPQCENDESEPATQ-----DTGLQGP-VGGDHPPEME---DPEEMS 887  
ENSPCAP00000000755\_Pcap/1-1085 --NEMLTRHQALLPQCETEPGSELTRQ-----ETDLQGS-PGGDYQVEME---GPEKRA 1059  
ENSCHOP00000011907\_Chof/1-954 ----- 954  
ENSVAP00000001982\_Vpac/1-1087 --NDALTRHQALLPQCCEADSELSTQ-----ETGLQGP-VGRDHQPEME---DPEEMS 1060  
ENSEEUP00000009670\_Eeur/1-946 --GDPLPRHQALLPQCCTDSDPIFP-----ETGLQGP-VGGDCQAEQ---DPEEMS 919  
ENSOANP00000001352\_Oana/1-1083 GGGDGPVRPRRALLPLRDGNPDSGSDPGS--REACLPE-----SGGEEPRDPEEGP 1054  
ENSOPRP00000000261\_Opri/1-1082 --NETLTRHQALLPQCGETEAEALMMGQ-----EESMHG-PVGGDCRDPDT---EAEPEEMS 1055  
ENSJJAP00000004721\_Jjac/1-1084 --NDTLRRHQALLPQCCTDSETTIP-----DAGLQRPIMVGDHQPMPQLEEEEEEMS 1051  
ENSPCIP000000034747\_Pcin/1-1018 --GDSLARRQALLPQSSSEAGSLGSG-----VLGSEE-SVVGDSQPDT--QIP-EEMS 991  
ENSMODP000000022810\_Mdom/1-1069 --GDSLARRQALLPQSSSEAGSLGSG-----DSGSNE-SVVGDSQSES---QIP-EEMS 1042  
ENSVURP00010007344\_Vurs/1-1070 --GDSLARRQALLPQSSSEAGSLGSG-----VLGSNE-SVVGDSQPET--QIP-EEMS 1043  
ENSSHAP000000014890\_Shar/1-1072 --GDSLARRQALLPQSSSEAGSLDLSG-----DLSNE-SVVGDSQPET--QIP-EEMS 1045  
ENSMAUP00000005394\_Maur/1-954 --SDTVTTSFHLRLCYSLDY-DPQPHI-----KRLV 940  
ENSOCUP000000025672\_Ocun/1-1063 --NDTLTRHQALLPQRGETDSETDGPDRPARAYGWGP-PARD-----QG 1062  
ENSPVAP000000011981\_Pvam/1-1085 --NDMTTRHQALLPQCGETDSELSTQ-----ETGLQG-PVGGDCQPET---EDP-EELS 1058  
ENSETEP00000011160\_Etel/1-1024 --SETLVRHQALLPQCAEMGSELAVP-----ETDLQG-SAGDRQPEM---EDP-EELT 997  
ENSFADP00000010532\_Fdam/1-1108 --SDGLSRHQALLPQYRDTDAGLATQ-----ETGLQG-LVAGDHQPEV---EE-TEEGS 1080  
ENSODEP000000013257\_Odeg/1-1070 --NDSLTKHQALLPQCCTDSDSLSTQ-----DTGLQG-LGAGDHQPEM---EAP-EEMA 1051  
ENSHGLP00000002019\_Hgfe/1-1108 --NDGLSRHQALLPQYRDTDGLTQ-----ETGQQG-MVAGDHQPEL---EDP-EEMS 1081  
ENSLAP000000021334\_Clan/1-1114 --NDGLTRHQALLPQGRDTSDLTQ-----ETGMQG-SVAGDHQPEV---EDP-EEMS 1087  
ENSCAPP000000014352\_Cape/1-1068 --NDGLTRHQ-----EKG-----QFEM---EDPEEMS 1041  
ENSCPOP00000011705\_Cpor/1-1071 --NDGLTRHQ-----LQCRDADSDPSTQ-----EKG-----QFEM---EDPEEMS 1044  
ENSSARP00000006151\_Sara/1-1085 --NDALTRHQALLPQGEADLELSPQ-----EAGLPG-PV-GGEHQPE---MEGREEMS 1058  
ENSLAFP000000018459\_Lafr/1-1090 --NEALTKHQALLPQCCTEPGSELTMQ-----DTDLQG-SA-GGDHQP-----TEGPEERA 1063  
ENSDNOP000000011819\_Dnov/1-1075 --NDTLGRQPAPLPQCCEAGSELAVQ-----ETGSPG-PV-AGDHQPE---TEDPEEMS 1048  
ENSSSCP000000041077\_Sscr/1-1089 --NDALTRHQALLPQCCEADAELTAQ-----ETGLQG-SV-GGDHHP---MEDPEEMS 1062  
ENSTTRP00000001326\_Ttrur/1-1091 --NDALTKHQALLPQCGETDSELSTQ-----ETGLQG-PV-GGDHQP---MEDPEEMS 1064  
ENSBEBP00000002858\_Bbbi/1-1068 --NDALTKHQALLPQCGETDSELSTQ-----ETGLQG-PV-GEDHQP---MEDPEEMS 1041  
ENSOARP000000021602\_Oari/1-1032 --NDALTKHQALLPQCGETDSELSTQ-----ETGLQG-PV-GEDHQP---MEDPEEMS 1005  
ENSHIP000000033853\_Chir/1-1085 --NDALTKHQALLPQCGETDSELSTQ-----ETGLQG-PV-SEDHQP---MEDPEEMS 1058  
ENSBTAP000000059078\_Btau/1-1085 --NDALTKHQALLPQCGETDSELSTQ-----ETGLQG-PV-GEDHQP---MEDPEEMS 1058  
ENSBIXP000000038534\_Bthy/1-1085 --NDALTKHQALLPQCGETDSELSTQ-----ETGLQG-PV-GEDHQP---MEDPEEMS 1058  
ENSBMUP000000019115\_Bmut/1-1081 --NDALTKHQALLPQCGETDSELSTQ-----ETGLQG-PV-GEDHQP---MEDPEEMS 1054  
ENSBIXP00000005030570\_Bihy/1-1085 --NDALTKHQALLPQCGETDSELSTQ-----ETGLQG-PV-GEDHQP---MEDPEEMS 1058  
ENSMUGP000000006365\_Mung/1-1080 --NDALSRHQALLPQCADTDSEMTIQ-----ETGLQG-PM-LGDHQP---MESPEEMS 1053  
ENSRNOP000000069629\_Rnor/1-1079 --NDTLGRHQALLPQCADSDSEMTIQ-----ETGLQG-PM-VGDHQP---MESPEEMS 1052  
MGP\_PahariEij\_P0043347\_Mpah/1-1003 --NDALNRHQALLPQCAEADSEMTIQ-----ETGLQG-PM-VGDHQP---MESADEMS 976  
MGP\_SPRETEiJ\_P0043347\_Mspr/1-1079 --NDTLNRHQALLPQCAEADSEMTIQ-----ETGLQG-PM-VGDHQP---IESPDEMS 1052  
ENSMUP000000069080\_Mmus/1-1079 --NDTLNRHQALLPQCAEADSEMTIQ-----ETGLQG-PM-VGDHQP---IESPDEMS 1052  
ENSMOCP000000010340\_Moch/1-1076 --NDTLRRHQALLPQCADTDSEMTQ-----ETGLQG-PM-VGDHQP---MESTEMS 1049  
ENSPMP000000029995\_Pmba/1-1076 --NDTLGRHQALLPQCADTDSEMTIQ-----E---TG-PM-VGDHQP---MESPEEMS 1049  
ENSCGRP00015024036\_Cgpi/1-1081 --NDTLRRHQALLPQCADTDSEMTIQ-----ETGLQG-PM-VGDHQP---MESPEEMS 1054  
ENSCGRP000000116053\_Cgch/1-1081 --NDTLRRHQALLPQCADTDSEMTIQ-----ETGLQG-PM-VGDHQP---MESPEEMS 1054  
ENSCGRP000000017369\_Cgcr/1-1081 --NDTLRRHQALLPQCADTDSEMTIQ-----ETGLQG-PM-VGDHQP---MESPEEMS 1054  
ENSDORP00000002959\_Dord/1-1078 --HEALTRHQALLPLPCEDTSELSTQ-----EPGKGG-GFAGGDCQPE---MEDPEEMS 1051  
ENSTSP00000002643\_Csyr/1-1015 --NDTLRRHQALLPQCGETDSELSTQ-----DPGLQG-PV-GGDHQP---MEDPEEMS 988  
ENSMLUP000000008249\_Mluc/1-1075 --NDTLTRHQALLPQCGETDSELSTQ-----ETGLQG-PV-GGDHQP---AEDPEEMS 1048  
ENSECAP000000022285\_Ecab/1-1084 --NDTLTRHQALLPQRGEIDSELSTQ-----ETGLQG-PA-VGDRQPE---RRNPEEMS 1057  
ENSEASP00000002676\_Eaas/1-1094 --NDTLTRHQALLPQRGEIDSELSTQ-----ETGLQG-PA-VGDRQPE---RRNPEEMS 1067  
ENSCAFP000000017381\_Cfam/1-1075 --PEPPARPQALLPQGGDDAELPAQ-----EPGLQG-PG-GADRRPE---MRDPEELS 1048  
ENSCAFP000000020007154\_Cldi/1-1075 --PEPPARPQALLPQGGDDAELPAQ-----EPGLQG-PG-GADRRPE---MRDPEELS 1048  
ENSVVUP000000030826\_Vvul/1-1075 --PEPPARPQALLPQGGDDAELPAQ-----EPGLQG-PG-GADRRPE---MRDPEELS 1048  
ENSFACAP000000008080\_Fvac/1-1081 --NETLTRHQALLPQCGETDSELSTQ-----ERGLQG-PV-DGDFRPE---MEDPEEMS 1054  
ENSPRP000000023800\_Ppar/1-1081 --NETLTRHQALLPQCGETDSELSTQ-----ERGLQG-PV-DGDFRPE---MEDPEEMS 1054  
ENSPPTIP00000015042\_Ptal/1-1081 --NETLTRHQALLPQCGETDSELSTQ-----ERGLQG-PV-DGDFRPE---MEDPEEMS 1054  
ENSMUP000000004759\_Mpfu/1-1082 --NETLSRHQALLPQCGETDSELSTQ-----ETGLQG-PV-GGDHRPE---TEDPEEMS 1055  
ENSNVIP00000018564\_Nvis/1-1092 --NETLSRHQALLPQCGETDSELSTQ-----EAGLQG-PG-GGDHRPE---TEDPEEMS 1065  
ENSUMAP000000035085\_Umar/1-1071 ----TLTRHQALLPQCREIDSLTQ-----ETGLQG-PV-GGDHRPE---TEDPEEMS 1044  
ENSUAMP000000035930\_Uame/1-1079 --NETLTRHQALLPQCCEIDSLTQ-----ETGLQG-PV-GGDHRPE---TEDPEEMS 1052  
ENSAMEP00000015060\_Amel/1-1089 --NETLTRHQALLPQCCEIDSLTQ-----ETGLQG-PV-GGDHRPE---TEDPEEMS 1062  
ENSSDAP000000007437\_Sdau/1-1079 --SDALTRHQALLPQCGETDSELSTQ-----ETGLQG-PM-AGAHQPE---MEDPEEMS 1052  
ENSSTOP000000003945\_Itri/1-1070 --SDALTRHQALLPQCGETDSELSTQ-----ETGLQG-PM-AGAHQPE---MEDPEEMS 1043  
ENSMMP00000015298\_Mmma/1-1083 --SDALTRHQALLPQCGETDSELSTQ-----ETGLQG-PM-AGAHQPE---MEDPEEMS 1056  
ENSUPAP00010025947\_Upar/1-1086 --SDALTRHQALLPQCGETDSELSTQ-----ETGLQG-PM-AGAHQPE---MEDPEEMS 1059  
ENSSBOP000000036416\_Sbbo/1-1078 --SDTLTRHQALLPQCGETDSELSTQ-----ETGLQG-SV-GADHRPE---VEDPEELS 1051  
ENSANAP000000028404\_Anan/1-1078 --SDTLTRHQALLPQCGETDSELSTQ-----ETGLQG-PV-GGDHRPE---VEDPEELS 1051  
ENSCCAP000000024327\_Ccap/1-1077 --SDTLTRHQALLPQCGETDSELSTQ-----ETGLQG-PV-GGDHRPE---VEDPEELS 1050  
ENSCJAP000000062854\_Cjac/1-1089 --SDTLTRHQALLPQCGETDSELSTQ-----ETGLQG-PV-GGDHRPE---VEDPEELS 1062  
ENSNLEP000000003336\_Nleu/1-1088 --SDTLTRHQALLPQCGETDSELSTQ-----ETGLQG-PV-GGDHRPE---VEDPEELS 1061  
ENSPYP000000015087\_Pabe/1-1078 --SDTLTRHQALLPQCGETDSELSTQ-----ETGLQG-PV-GGDHRPE---VEDPEELS 1051  
ENSP000000420194\_Hsap/1-1088 --SDTLTRHQALLPQCGETDSELSTQ-----ETGLQG-PV-GGDHRPE---VEDPEELS 1061  
ENSGGQP000000020287\_Ggor/1-1078 --SDTLTRHQALLPQCGETDSELSTQ-----ETGLQG-PV-GGDHRPE---VEDPEELS 1051  
ENSPFAP000000026371\_Ppan/1-1078 --SDTLTRHQALLPQCGETDSELSTQ-----ETGLQG-PV-GGDHRPE---VEDPEELS 1051  
ENSPTRP000000043346\_Ptro/1-1078 --SDTLTRHQALLPQCGETDSELSTQ-----ETGLQG-PV-GGDHRPE---VEDPEELS 1051  
ENSCSAP000000003635\_Csab/1-882 --SDTLTRHQALLPQCCEADSLSVQ-----ETGLQG-PV-GGDHRPE---VEDPEELS 855  
ENSMMP000000061002\_Mmul/1-1078 --SDTLARHQALLPQCCEADSLSVQ-----ETGLQG-PV-GGDHRPE---VEDPEELS 1051  
ENSPANP0000000004316\_Panu/1-1081 --SDTLARHQALLPQCCEADSLSVQ-----ETGLQG-PV-GGDHRPE---VEDPEELS 1054

ENSCATP00000028615\_Caty/1-1078 --SDTLARHQALLPQCGEADSDLSVQ-----ETGLQG-FV-GGDHRPE--VEVPEELS 1051
ENSMFAP00000042132\_Mfas/1-1078 --SDTLARHQALLPQCGEADSDLSVQ-----ETGLQG-FV-GGDHRPE--VEVPEELS 1051
ENSMNEP00000024602\_Mnem/1-1078 --SDTLARHQALLPQCGEADSDLSVQ-----ETGLQG-FV-GGDHRPE--VEVPEELS 1051
ENSMLEP00000008744\_Mleu/1-1088 --SDTLARHQALLPQCGEADSDLSVQ-----ETGLQG-FV-GGDHRPE--VEVPEELS 1061
ENSTGEP00000008766\_Tgel/1-1088 --SDTLARHQALLPQCGEADSDLSVQ-----ETGLQG-FV-GGDHRPE--VEVPEELS 1061
ENSCANP00000040262\_Capa/1-1088 --SDTLTRHQALLPQCCEVSDSDLSVQ-----ETGLQG-FV-GGDHRPE--MEDPEELS 1061
ENSPTEP00000016080\_Ptep/1-1088 --SDTLTRHQALLPQCCEVSDSDLSVQ-----ETGLQG-FV-GGDHRPE--VEDPEELS 1061
ENSRBIP00000006831\_Rbie/1-1078 --SDTLTRHQALLPQCCEVSDSDLSVQ-----ETGLQG-FV-GGDHRPE--VEDPEELS 1051
ENSRROP00000007818\_Rrox/1-1088 --SDTLTRHQALLPQCCEVSDSDLSVQ-----ETGLQG-FV-GGDHRPE--VEDPEELS 1061
ENSOGAP00000002850\_Ogar/1-1077 --NDTLTRHQALLPQCGETDSELTIQ-----ETGLQG-PG-GGDHQR--REDPEEMS 1050
ENSMICP000000050654\_Mmur/1-1075 --SDTLSRHQALLPQCGETDPDPTAQ-----DAGLQG-PG-GGDLPE--MEGPEEMS 1048
ENSPCOP00000009624\_Pcoq/1-1076 --NDALSRHQALLPQCGETDSELMIQ-----DTGLQG-PG-GGDHPPE--MEDPEEMS 1049
ENSPSPM00000007909\_Psim/1-1084 --SDPLGRHQALLPQCGETDSELTVP-----DTGLQG-PG-GGDHPPE--MEDPEEMS 1057

ENSMEUP00000013310\_Neug/1-956 ----- 956
ENSTBEP00000002487\_Tbel/1-914 PALVVSNSRSFVVISGGSTGTENILHS----- 914
ENSPCAP00000000755\_Pcap/1-1085 PALVVSQSFSFVISGGGTGQRNVNS----- 1085
ENSCPOP00000011907\_Chof/1-954 ----- 954
ENSVAP000000001982\_Vpac/1-1087 PALVVSNSRSFVVISGGSTVTENMLHS----- 1087
ENSEEUP00000009670\_Eeur/1-946 PALVVSNAHSFVISRGGSTITENILHL----- 946
ENSOANP00000015961\_Oana/1-1083 PALLVFNARSFVISGXXXXXXXXXXXXXXXXX---- 1083
ENSOPRP00000000261\_Opri/1-1082 PGLVVSNSRSFVVISGGGSAVAENRLHS----- 1082
ENSJJAP00000004721\_Jjac/1-1084 PALVMSKSGSFVISGGGSAVTEVDLRSQSQKSS 1084
ENSPCIP000000034747\_Pcin/1-1018 PGLVVSNSRGFVISGGGSAITEKKIHS----- 1018
ENSMODP000000022810\_Mdom/1-1069 PALVVSNSRGFVISGGGSAITEKKLHS----- 1069
ENSVURP00010007344\_Vurs/1-1070 PALVVSNSRGFVISGGGSAVTEKKIHS----- 1070
ENSSHAP00000014890\_Shar/1-1072 PALVVSNSRGFVISGGGSAVTEKKIHS----- 1072
ENSMAP000000005394\_Maur/1-954 PCMVLE-----GHGAFSK----- 954
ENSOCUP000000025672\_Ocun/1-1063 P----- 1063
ENSPVAP00000011981\_Pvam/1-1085 PALVVSNSRSFVVISGGSTVTENILHS----- 1085
ENSETEP000000011160\_Etel/1-1024 PTLVVSTRSLVISGGGSAARENPNPS----- 1024
ENSFDAP00000010532\_Fdam/1-1108 PTLVMAKRSFVISGGASTAKESSPHSQ----- 1108
ENSODEP00000013257\_Odeg/1-1070 QAFVVSQSQGFVVIKNIWHS----- 1070
ENSHGLP000000002019\_Hgfe/1-1108 PALVMSKRSFVISGGGSTVTENILHS----- 1108
ENSCLAP000000021334\_Clan/1-1114 PAFVVSQSQGFVISGGGSAVTENILHT----- 1114
ENSCAPP00000014352\_Cape/1-1068 PAFVMSKSQGFVFSGGGSTVTENILHS----- 1068
ENSCPOP000000011705\_Cpor/1-1071 PAFVMSKSQGFVFSGGGSTVTENILHS----- 1071
ENSSARP00000006151\_Sara/1-1085 PALVVSNSRSFVISGAGSTVTENIMHS----- 1085
ENSLAFP00000018459\_Lafr/1-1090 PALVVSNSRSFVISGGGSTVTENIPNS----- 1090
ENSDNOP000000011819\_Dnov/1-1075 PALMVNSRSGFVISGGGSTVTENMLRS----- 1075
ENSSSCP000000041077\_Sscr/1-1089 PALVMSNSRSFVISGGGSTVTENMLHS----- 1089
ENSTTRP00000001326\_Ttru/1-1091 PALVVSNSRSFVISGGGSTVTENMLRS----- 1091
ENSBEP000000002858\_Bbbi/1-1068 PALVVSNSRSFVISGGGSTVTENMLRS----- 1068
ENSOARP000000021602\_Oari/1-1032 PALVVSNSRSFVISGGGSTVTENMLRS----- 1032
ENSCHIP000000033385\_Chir/1-1085 PALVVSNSRSFVISGGGSTVTENMLRS----- 1085
ENSBTAP000000059078\_Btau/1-1085 PALVVSNSRSFVISGGGSTVTENMLRS----- 1085
ENSBIXP000000038534\_Bthy/1-1085 PALVVSNSRSFVISGGGSTVTENMLRS----- 1085
ENSBMUP000000019115\_Bmut/1-1081 PALVVSNSRSFVISGGGSTVTENMLRS----- 1081
ENSBIXP00000005030570\_Bihy/1-1085 PALVVSNSRSFVISGGGSTVTENMLRS----- 1085
ENSMUGP000000006365\_Mung/1-1080 PALVVSTRSFSFVISGGSSVTENILHS----- 1080
ENSRNOP000000069629\_Nrong/1-1079 PALVMSTRSFSFVISGGSSVTENVLHS----- 1079
MGP\_PahariEiJ\_P0028852\_Mpah/1-1003 PALVMSTRSFSFVISGGSSMSENILHS----- 1003
MGP\_SPRETEiJ\_P0043347\_Mspr/1-1079 PALVMSTRSFSFVISGGSSVTENILHS----- 1079
ENSMUSP000000069080\_Mmus/1-1079 PALVMSTRSFSFVISGGSSVTENILHS----- 1079
ENSMOCP00000010340\_Moch/1-1076 PALVMSTRSFSFVISGGSSVTENILHS----- 1076
ENSPEMP000000029995\_Pmba/1-1076 PALVVSTRSFSFVISGGSSVTENILHS----- 1076
ENSCGRP00015024036\_Cgpi/1-1081 PALVVSTRSFSFVISGGSSVTENILHS----- 1081
ENSCGRP00001016053\_Cgch/1-1081 PALVVSTRSFSFVISGGSSVTENILHS----- 1081
ENSCGRP00000017369\_Cgcr/1-1081 PALVVSTRSFSFVISGGSSVTENILHS----- 1081
ENSDORP000000002959\_Dord/1-1078 PALVMSKRSFVISGGGSTVTENILHS----- 1078
ENSTSY000000002643\_Csyr/1-1015 PARVVSNSRSFVISGGGSTVTENILHS----- 1015
ENSMMLUP000000008249\_Mluc/1-1075 PALVVSNSRSFVISGGGSTVTENILHS----- 1075
ENSECAP000000022285\_Ecab/1-1084 PTLVVSNSRSFVISGGGSTVTENILHS----- 1084
ENSEASP000000022676\_Eaas/1-1094 PTLVVSNSRSFVISGGGSTVTENILHS----- 1094
ENSCAFP00000017381\_Cfam/1-1075 PALVVSNSRSFVISGGGSTVTENILHS----- 1075
ENSCAFP000200007154\_Cldi/1-1075 PALVVSNSRSFVISGGGSTVTENILHS----- 1075
ENSVVUP000000030826\_Vvul/1-1075 PALVVSNSRSFVISGGGSTVTENILHS----- 1075
ENSFAP000000008080\_Fcat/1-1081 PALVVSNSRSFVISGGGSTVTENILHS----- 1081
ENSPRP0000000023800\_Ppar/1-1081 PALVVSNSRSFVISGGGSTVTENILHS----- 1081
ENSPPIP00000015042\_Ptal/1-1081 PALVVSNSRSFVISGGGSTVTENILHS----- 1081
ENSMUP000000004759\_Mpfu/1-1082 PALVVSNSRSFVISGGGSTVTENILHS----- 1082
ENSNVIP000000018564\_Nvis/1-1092 PALVVSNSRSFVISGGGSTVTENILHS----- 1092
ENSUMAP000000035085\_Umar/1-1071 PALVVSNSRSFVISGGGSTVTENILHS----- 1071
ENSUAMP000000035930\_Uame/1-1079 PALVVSNSRSFVISGGGSTVTENILHS----- 1079
ENSAMEP000000015060\_Amel/1-1089 PALVVSNSRSFVISGGGSTVTENILHS----- 1089
ENSSDAP000000007437\_Sdau/1-1079 PALVVSNSRSFVISGGGSTVTENILHS----- 1079
ENSSTOP000000003945\_Itri/1-1070 PALVVSNSRSFVISGGGSTVTENILHS----- 1070
ENSMMP000000015298\_Mmma/1-1083 PALVVSNSRSFVISGGGSTVTENILHS----- 1083
ENSUPAP00010025947\_Upar/1-1086 PALVVSNSRSFVISGGGSTVTENILHS----- 1086
ENSSBOP000000036416\_Sbbo/1-1078 PALVVSNSRSFVISGGGSTVTENVLHS----- 1078
ENSANAP000000028404\_Anan/1-1078 PALVVSNSRSFVISGGGSTVTENVLHS----- 1078
ENSCCAP000000024327\_Ccap/1-1077 PALVVSNSRSFVISGGGSTVTENVLHS----- 1077
ENSCJAP000000062854\_Cjac/1-1089 PALVVSNSRSFVISGGGSTVTENVLHS----- 1089
ENSNLEP000000000336\_Nleu/1-1088 PALVVSNSRSFVISGGGSTVTENVLNS----- 1088
ENSPYP00000015087\_Pabe/1-1078 PALVVSNSRSFVISGGGSTVTENVLNS----- 1078
ENSP00000420194\_Hsap/1-1088 PALVVSNSRSFVISGGGSTVTENVVNS----- 1088
ENSGOP000000020287\_Ggor/1-1078 PALVVSNSRSFVISGGGSTVTENVLNS----- 1078



|                                 |                                  |      |
|---------------------------------|----------------------------------|------|
| ENSPPAP00000026371_Ppan/1-1078  | PALVVSSSQSFVISGGGSTVTENVLNS----- | 1078 |
| ENSPTRP00000043342_Ptro/1-1078  | PALVVSSSQSFVISGGGSTVTENVLNS----- | 1078 |
| ENSCSAP00000003635_Csab/1-882   | PALVVSSSQSFVISGGGSTVTENVLHS----- | 882  |
| ENSMMP000000061002_Mmul/1-1078  | PALVVSSSQSFVISGGGSTVTENVLHS----- | 1078 |
| ENSPANP00000004316_Panu/1-1081  | PALVVSSSQSFVISGGGSTVTENVLHS----- | 1081 |
| ENSCATP000000028615_Caty/1-1078 | PALVVSSSQSFVISGGGSTVTENVLHS----- | 1078 |
| ENSMFAP00000042132_Mfas/1-1078  | PALVVSSSQSFVISGGGSTVTENVLHS----- | 1078 |
| ENSMNEP000000024602_Mnem/1-1078 | PALVVSSSQSFVISGGGSTVTENVLHS----- | 1078 |
| ENSMLEP000000008744_Mleu/1-1088 | PALVVSSSQSFVISGGGSTVTENVLHS----- | 1088 |
| ENSTGEP000000008766_Tgel/1-1088 | PALVVSSSQSFVISGGGSTVTENVLHS----- | 1088 |
| ENSCANP000000040262_Capa/1-1088 | PALVVSSSQSFVISGGGSTVTENVLHS----- | 1088 |
| ENSPTEP000000016080_Ptep/1-1088 | PGLVVSSSQSFVISGGGSTVTENVLHS----- | 1088 |
| ENSRBIP000000006831_Rbie/1-1078 | PALVVSSSQSFVISGGGSTVTENVLHS----- | 1078 |
| ENSRROP000000007818_Rrox/1-1088 | PALVVSSSQSFVISGGGSTVTENVLHS----- | 1088 |
| ENSOGAP000000002850_Ogar/1-1077 | PALVVSNSRSFVISGGGSTVTENVLHL----- | 1077 |
| ENSMICP000000050654_Mmur/1-1075 | PALVVSSRSFVISGGGSTVTENVLHL-----  | 1075 |
| ENSPCOP000000009624_Pcoq/1-1076 | PALVVSNSRSFVISGGGSTVTENVLHL----- | 1076 |
| ENSPSMP000000007909_Psim/1-1084 | PALVVPNSRSFVISGGGSTVTENVLHL----- | 1084 |

**Supplementary Figure 3: Mammalian CaSR multiple sequence alignment including the residue 91 (red arrows). The alignment was generated using the Clustal Omega server [1].**

*In vitro* screening of 159 predicted kokumi-active compounds on cCaSR

| Compound ID                                                             | CAS number   | EC <sub>50</sub> Ago (M) | EC <sub>50</sub> PAM (M) |
|-------------------------------------------------------------------------|--------------|--------------------------|--------------------------|
| (1R)-(+)-(1-Amino-2-methylpropyl)phosphonic acid                        | 66254-56-6   | -                        | -                        |
| (S)- $\alpha$ -Methylaspartic acid                                      | 3227-17-6    | -                        | -                        |
| 1,4,8,11-tetraazacyclotetradecane                                       | 295-37-4     | 0.000773242              | -                        |
| 1-isopropyl-2,3,4,9-tetrahydro-1H-pyrido[3,4-b]indole-3-carboxylic acid | 436811-11-9  | -                        | -                        |
| 1s,3s-1-aminocyclobutane-1,3-dicarboxylic acid                          | 73550-55-7   | > 0.01                   | -                        |
| 2,6-Diaminopimelic acid                                                 | 583-93-7     | -                        | -                        |
| 2-Amino-4-phosphonobutyric acid                                         | 20263-07-4   | > 0.01                   | -                        |
| 2-aminododecanedioic acid                                               | 3721-90-2    | -                        | -                        |
| 2-Aminopimelic acid                                                     | 627-76-9     | -                        | -                        |
| 2S,4S-g-Hydroxy-L-glutamic acid                                         | 3913-68-6    | > 0.01                   | -                        |
| 3,5-Dimethyl-4-methoxybenzoylacetone nitrile                            | 884504-21-6  | -                        | -                        |
| 3-Glutathionyl-S-methylindole                                           | 101038-93-1  | 0.003746383              | -                        |
| 3-O-Methyl-D-glucopyranose                                              | 13224-94-7   | -                        | -                        |
| 4-Fluoro-DL-glutamic acid                                               | 2708-77-2    | > 0.01                   | -                        |
| 9H-pyrido[3,4-b]indole-3-carboxylic acid                                | 42438-90-4   | -                        | -                        |
| AC-265347                                                               | 1253901-26-6 | -                        | 5.11238E-08              |
| Antibiotic G418                                                         | 49863-47-0   | -                        | -                        |
| BaCl <sub>2</sub>                                                       | 10361-37-2   | 0.001172392              | -                        |
| CaCl <sub>2</sub>                                                       | 10035-04-8   | 0.001622123              | -                        |
| Cadaverine                                                              | 462-94-2     | -                        | -                        |
| Calcium Ionophore                                                       | 58801-34-6   | -                        | -                        |
| Calhex 231                                                              | 2387505-78-2 | -                        | -                        |
| Calindol                                                                | 729610-18-8  | -                        | 2.96569E-07              |
| Cerium(III) carbonate                                                   | 54451-25-1   | -                        | -                        |
| ChemBridge CORE Library - 7126534                                       | N/A          | -                        | 3.99941E-06              |
| ChemBridge CORE Library - 7156222                                       | N/A          | -                        | 3.68478E-06              |
| Cinacalcet                                                              | 226256-56-0  | -                        | 7.46105E-07              |
| Cystine (disulfide)                                                     | 56-89-3      | -                        | -                        |
| D-(+)-Glucose                                                           | 2280-44-6    | -                        | -                        |
| D-Arginine                                                              | 157-06-2     | -                        | -                        |
| D-Aspartic Acid                                                         | 1783-96-6    | -                        | -                        |
| D-Glutamic acid                                                         | 6893-26-1    | -                        | -                        |
| Dichloromethylenediphosphonic acid                                      | 22560-50-5   | -                        | -                        |
| DL-Aspartic acid alpha-methyl ester                                     | 65414-77-9   | > 0.01                   | -                        |
| D-Lysine                                                                | 923-27-3     | -                        | -                        |
| Enamine Screening - Z1362199910                                         | N/A          | -                        | 5.88796E-05              |
| Enamine Screening - Z1436888168                                         | N/A          | -                        | 4.57134E-05              |
| Enamine Screening - Z1437387381                                         | N/A          | -                        | 9.00814E-06              |
| Enamine Screening - Z1532507755                                         | N/A          | -                        | 8.68191E-06              |
| Enamine Screening - Z1563602968                                         | N/A          | -                        | -                        |
| Enamine Screening - Z1589915397                                         | N/A          | -                        | 0.000122222              |
| Enamine Screening - Z1592615858                                         | N/A          | -                        | 1.92068E-06              |

|                                              |            |             |             |
|----------------------------------------------|------------|-------------|-------------|
| Enamine Screening - Z1627256025              | N/A        | -           | 0.000796597 |
| Enamine Screening - Z1857407854              | N/A        | -           | 5.5023E-06  |
| Enamine Screening - Z317045236               | N/A        | -           | 2.41537E-06 |
| Enamine Screening - Z336933272               | N/A        | -           | 1.21254E-05 |
| Gd <sup>3+</sup>                             | 16056-77-2 | 0.000294595 | -           |
| Gentamicin                                   | 1403-66-3  | 0.000989847 | -           |
| Glutathione (γ-Glu-Cys-Gly)                  | 70-18-8    | 0.006396298 | -           |
| Glycine                                      | 56-40-6    | -           | -           |
| Hexamethylenetetramine                       | 100-97-0   | -           | -           |
| Hydroxyproline                               | 51-34-4    | -           | -           |
| Hygromycin B                                 | 31282-04-9 | -           | -           |
| InterBioScreen Screening - STOCK1N-20329     | N/A        | -           | 9.87677E-07 |
| InterBioScreen Screening - STOCK1N-29175     | N/A        | -           | 7.13774E-07 |
| InterBioScreen Screening - STOCK1N-29290     | N/A        | -           | 4.49052E-06 |
| InterBioScreen Screening - STOCK1N-32683     | N/A        | -           | 6.73283E-07 |
| InterBioScreen Screening - STOCK1N-32983     | N/A        | -           | 7.51716E-07 |
| InterBioScreen Screening - STOCK2S-09124     | N/A        | -           | 1.40781E-06 |
| InterBioScreen Screening - STOCK2S-10026     | N/A        | -           | 4.57282E-07 |
| InterBioScreen Screening - STOCK3S-12225     | N/A        | -           | 2.25131E-06 |
| InterBioScreen Screening - STOCK3S-57962     | N/A        | -           | 1.44874E-06 |
| InterBioScreen Screening - STOCK3S-69159     | N/A        | -           | 0.000135294 |
| InterBioScreen Screening - STOCK4S-85937     | N/A        | -           | 0.000114962 |
| InterBioScreen Screening - STOCK5S-00071     | N/A        | -           | 0.000171864 |
| Kanamycin solution                           | 25389-94-0 | -           | -           |
| L-(+)-2-Amino-3-phosphonopropionic acid      | 23052-80-4 | > 0.01      | -           |
| L-2-Amino-4-phosphonobutyric acid            | 20263-07-4 | -           | -           |
| L-2-Aminoadipic acid                         | 1118-90-7  | > 0.01      | -           |
| L-Alanine                                    | 56-41-7    | -           | -           |
| L-Arginine                                   | 74-79-3    | -           | -           |
| L-Arginine methyl ester                      | 2577-94-8  | -           | -           |
| L-Asparagine                                 | 70-47-3    | -           | -           |
| L-Aspartic acid                              | 56-84-8    | 0.004114576 | -           |
| L-Aspartic acid β-methyl ester hydrochloride | 16856-13-6 | > 0.01      | -           |
| L-Cysteic acid                               | 498-40-8   | 0.002339771 | -           |
| L-Cysteine                                   | 52-90-4    | -           | -           |
| L-Glutamic acid                              | 56-86-0    | 0.00915731  | -           |
| L-Glutamic Acid 5-Methyl Ester               | 1499-55-4  | -           | -           |
| L-Glutamine                                  | 56-85-9    | -           | -           |
| L-Histidine                                  | 71-00-1    | -           | -           |
| L-Homocysteic acid                           | 14857-77-3 | > 0.01      | -           |
| L-Homoserine                                 | 672-15-1   | -           | -           |
| L-Isoglutamine                               | 636-65-7   | > 0.01      | -           |
| L-Isoleucine                                 | 73-32-5    | -           | -           |
| L-Leucine                                    | 61-90-5    | -           | -           |
| L-Methionine                                 | 63-68-3    | -           | -           |
| L-Ornithine                                  | 70-26-8    | -           | -           |

|                                                                            |             |             |             |
|----------------------------------------------------------------------------|-------------|-------------|-------------|
| L-Proline                                                                  | 147-85-3    | -           | -           |
| L-Selenocystine monohydrate                                                | 29621-88-3  | -           | -           |
| L-Serine                                                                   | 56-45-1     | -           | -           |
| L-Taurine                                                                  | 107-35-7    | -           | -           |
| L-Threonine                                                                | 72-19-5     | -           | -           |
| L-Tyrosine                                                                 | 60-18-4     | -           | -           |
| L-Valine                                                                   | 72-18-4     | -           | -           |
| Methylenediphosphonic acid                                                 | 1984-15-2   | 0.001292506 | -           |
| Methylphosphonic acid                                                      | 993-13-5    | >0.01       | -           |
| Mg <sup>2+</sup>                                                           | 22537-22-0  | 0.006293176 | -           |
| N,N'-Bis(2-aminoethyl)-1,3-propanediamine                                  | 4741-99-5   | -           | -           |
| Neomycin                                                                   | 119-04-0    | 0.001868047 | -           |
| NG,NG-Dimethylarginine dihydrochloride                                     | 220805-22-1 | -           | -           |
| NG-methyl L Arginine                                                       | 53308-83-1  | -           | -           |
| NG-Nitro-L-Arginine Methyl Ester                                           | 2149-70-4   | -           | -           |
| NPS 2143                                                                   | 284035-33-2 | -           | -           |
| N $\omega$ -Nitro-L-arginine methyl ester hydrochloride                    | 51298-62-5  | -           | -           |
| O-Phospho-L-tyrosine                                                       | 21820-51-9  | > 0.01      | -           |
| Paromomycin sulfate salt                                                   | 1263-89-4   | 0.001084496 | -           |
| Poly-L-arginine                                                            | 26982-20-7  | 1.0135E-06  | -           |
| Poly-L-histidine                                                           | 26062-48-6  | -           | -           |
| Poly-L-lysine                                                              | 25988-63-0  | > 0.01      | -           |
| Poly-L-ornithine                                                           | 26982-21-8  | 0.000239862 | -           |
| Praseodymium(III) trifluoromethanesulfonate                                | 52093-27-3  | 0.000397784 | -           |
| Ribostamycin sulfate salt                                                  | 53797-35-6  | > 0.01      | -           |
| S-(2-Hydroxyethyl)glutathione                                              | 28747-20-8  | 0.002097055 | -           |
| S-1,1-dimethyl-2,3,4,9-tetrahydro-1H-pyrido[3,4-b]indole-3-carboxylic acid | N/A         | -           | -           |
| S-2,3-diaminopropanoic acid                                                | 4033-39-0   | -           | -           |
| Se-(Methyl)selenocysteine                                                  | 863394-07-4 | 0.004468107 | -           |
| Sisomicin sulfate salt                                                     | 53179-09-2  | 0.000299662 | -           |
| S-Lactoylglutathione                                                       | 25138-66-3  | 0.006084892 | -           |
| S-Methylglutathione                                                        | 2922-56-7   | 0.004418495 | -           |
| Sodium pyrophosphate tetrabasic decahydrate                                | 13472-36-1  | -           | -           |
| Spermidine                                                                 | 124-20-9    | 0.002495307 | -           |
| Spermine                                                                   | 71-44-3     | 0.012240719 | -           |
| S-piperazine-2-carboxylic acid                                             | 158663-69-5 | -           | -           |
| Sr <sup>2+</sup>                                                           | 22537-39-9  | >0.01       | -           |
| Sucralose                                                                  | 56038-13-2  | -           | -           |
| Sucrose                                                                    | 57-50-1     | -           | -           |
| Terbium(III) acetate hydrate                                               | 100587-92-6 | 0.000174627 | -           |
| Tobramycin                                                                 | 32986-56-4  | -           | 0.024201762 |
| Triethylenetetramine                                                       | 112-24-3    | -           | -           |
| Vitas M Labs Express Pick - STK530456                                      | N/A         | -           | 2.61244E-05 |
| $\beta$ -Asp-Ala                                                           | 13110-25-3  | > 0.01      | -           |
| $\beta$ -Asp-Gly                                                           | 3790-52-1   | > 0.01      | -           |

|                                    |             |             |   |
|------------------------------------|-------------|-------------|---|
| $\beta$ -Asp-Leu                   | 14650-26-1  | > 0.01      | - |
| $\beta$ -Asp-Lys                   | 56523-60-5  | -           | - |
| $\beta$ -Asp-Phe                   | 13433-10-8  | > 0.01      | - |
| $\gamma$ -Carboxy-DL-glutamic acid | 56271-99-9  | > 0.01      | - |
| $\gamma$ -D-Glu-Trp                | 66471-20-3  | 0.004204093 | - |
| $\gamma$ -Glu-Abu                  | 16869-42-4  | > 0.01      | - |
| $\gamma$ -Glu-Abu-Gly              | 495-27-2    | 0.002658678 | - |
| $\gamma$ -Glu-Ala                  | 5875-41-2   | > 0.01      | - |
| $\gamma$ -Glu-Cys                  | 636-58-8    | > 0.01      | - |
| $\gamma$ -Glu-Cys-Gly-Oet          | 92614-59-0  | -           | - |
| $\gamma$ -Glu-Gln                  | 10148-81-9  | > 0.01      | - |
| $\gamma$ -Glu-Glu                  | 1116-22-9   | 0.002064774 | - |
| $\gamma$ -Glu-Glu-Gln              | 211430-99-8 | > 0.01      | - |
| $\gamma$ -Glu-Glu-Glu              | 7446-63-1   | 0.002345792 | - |
| $\gamma$ -Glu-Gly                  | 1948-29-4   | > 0.01      | - |
| $\gamma$ -Glu-Gly-Gly              | 13640-39-6  | -           | - |
| $\gamma$ -Glu-His                  | 37460-15-4  | -           | - |
| $\gamma$ -Glu-Leu                  | 2566-39-4   | > 0.01      | - |
| $\gamma$ -Glu-Lys                  | 56523-60-5  | -           | - |
| $\gamma$ -Glu-Met                  | 17663-87-5  | > 0.01      | - |
| $\gamma$ -Glu-Phe                  | 13433-10-8  | 0.002316942 | - |
| $\gamma$ -Glu-Trp                  | 66471-20-3  | > 0.01      | - |
| $\gamma$ -Glu-Tyr                  | 7432-23-7   | 0.003877693 | - |
| $\gamma$ -Glu-Val                  | 2746-34-1   | 0.004518862 | - |
| $\gamma$ -Glu-Val-Gly              | 38837-70-6  | 0.004222828 | - |
| $\gamma$ -Glu- $\epsilon$ -Lys     | 17105-15-6  | -           | - |

**Supplementary Table I:** List of all 159 tested compounds on cCaSR using in vitro cellular assays. The table contains the EC<sub>50</sub> values for both agonists (EC<sub>50</sub> Ago(M)) and positive allosteric modulators (EC<sub>50</sub> PAM (M)). All compounds listed here were screened, using the HEK293/ T-REx/ natClytin cell line inducibly expressing cCaSR in an agonist assay. All measurements were repeated over at least three wells on the same assay plate. If the maximal response to a compound was not reached, the EC<sub>50</sub> value could not be determined and is expressed as an estimation at > 0.01 M. -: compounds that showed no activity on cCaSR in the specific testing parameters used.

**References:**

- 1 Sievers, F. *et al.* Fast, scalable generation of high-quality protein multiple sequence alignments using Clustal Omega. *Mol Syst Biol* **7**, 539, doi:10.1038/msb.2011.75 (2011).
